# Supplementary material for: Genome-wide identification of the CYP82 gene family in cucumber and functional characterization of CsCYP82D102 in regulating resistance to powdery mildew
Source: PeerJ. 2024 Mar 28;12:e17162. doi: 10.7717/peerj.17162 (PMC10981884; doi:10.7717/peerj.17162)
Supplement: Supplemental Information 10 [file peerj-12-17162-s010.xlsx]

## Sheet: Sheet1
Motif	E-value	sites	Width	Sequence
1	1.2e-263	12	41	ADAYGPIFTLRLGMHRALVVSNWEIAKECFTTNDRIFASRP
2	2.4e-250	10	50	PRESTEDCTIAGYHIPAGTRLIVNIQKJQRDPRVWEDPCEFKPERFLTSH
3	1.9e-227	12	50	RDFFELFGVFVPSDSFPFLSWLDLGGYEKAMKKTAKILDEVLDKWLEEHR
4	9.5e-216	10	50	QNPZLIPFGSGRRMCPGLSFALQMMHLALANLLHGFEIKRPSKELIDMEE
5	1.2e-229	10	50	NNEEALKKAQLELDEQVGRQRQVKESDIKNLVYLQAIVKETLRLYPAGPL
6	1.9e-180	11	41	KLVASKLLGYBYAMFGLSPYGPYWRHIRKIAMLELLSNHRL
7	1.6e-122	12	29	KVLVEMKKWFGDITLNTIFKMVIGKRFST
8	2.7e-100	12	21	PPEPGGAWPVIGHLHLLNASE
9	2.9e-94	11	35	LSLVDDDEZLSGYDADTVIKATCLALILGGTDTTT
10	8.9e-53	12	21	QLQHIRVSEVQTSIKELYELW
