# Supplementary material for: Genome-wide identification of the CYP82 gene family in cucumber and functional characterization of CsCYP82D102 in regulating resistance to powdery mildew
Source: PeerJ. 2024 Mar 28;12:e17162. doi: 10.7717/peerj.17162 (PMC10981884; doi:10.7717/peerj.17162)
Supplement: Supplemental Information 11 [file peerj-12-17162-s011.xls]

## Sheet: Sheet1
ITEM TO CHECK	IMPORTANCE	CHECKLIST
EXPERIMENTAL DESIGN
Definition of experimental and control groups	E	See Methods
Number within each group	E	See Methods
Assay carried out by core lab or investigator's lab?	D	Investigator's lab
Acknowledgement of authors' contributions	D	See Acknowledgedments
SAMPLE
Description	E	See Methods
Volume/mass of sample processed	D	See Methods
Microdissection or macrodissection	E	macrodissection
Processing procedure	E	All materials including roots, stems, and leaves were immediately frozen in liquid nitrogen and stored at -80℃ until total RNA isolation.
If frozen - how and how quickly?	E	All materials including roots, stems, and leaves were immediately frozen in liquid nitrogen and stored at -80℃ until total RNA isolation.
If fixed - with what, how quickly?	E	See Methods
Sample storage conditions and duration (especially for FFPE samples)	E	All materials including roots, stems, and leaves were immediately frozen in liquid nitrogen and stored at -80℃ until total RNA isolation.
NUCLEIC ACID EXTRACTION
Procedure and/or instrumentation	E	Total RNA was extracted from each samples using RNA pure Plant Kit (Cwbio, Beijing, China) according to the manufacturer’s instructions.
Name of kit and details of any modifications	E	No
Source of additional reagents used	D	See Methods
Details of DNase or RNAse treatment	E	See Methods
Contamination assessment (DNA or RNA)	E	The sample is processed by DNase.
Nucleic acid quantification	E	See Methods
Instrument and method	E	See Methods
Purity (A260/A280)	D
Yield	D
RNA integrity method/instrument	E	Gel electrophoresis
RIN/RQI or Cq of 3' and 5' transcripts	E	See Methods
Electrophoresis traces	D
Inhibition testing (Cq dilutions, spike or other)	E	See Methods
REVERSE TRANSCRIPTION
Complete reaction conditions	E	See Methods
Amount of RNA and reaction volume	E	See Methods
Priming oligonucleotide (if using GSP) and concentration	E	See Methods
Reverse transcriptase and concentration	E	See Methods
Temperature and time	E	See Methods
Manufacturer of reagents and catalogue numbers	D	See Methods
Cqs with and without RT	D*	See Methods
Storage conditions of cDNA	D	See Methods
qPCR TARGET INFORMATION
If multiplex, efficiency and LOD of each assay.	E	See Methods and Table S1.
Sequence accession number	E	See Methods and Table S1.
Location of amplicon	D	See Methods and Table S1.
Amplicon length	E	See Methods and Table S1.
In silico specificity screen (BLAST, etc)	E	See Methods and Table S1.
Pseudogenes, retropseudogenes or other homologs?	D	See Methods and Table S1.
Sequence alignment	D	See Methods and Table S1.
Secondary structure analysis of amplicon	D	See Methods and Table S1.
Location of each primer by exon or intron (if applicable)	E	See Methods and Table S1.
What splice variants are targeted?	E	See Methods and Table S1.
qPCR OLIGONUCLEOTIDES
Primer sequences	E	Table S1.
RTPrimerDB Identification Number	D
Probe sequences	D**
Location and identity of any modifications	E	Table S1.
Manufacturer of oligonucleotides	D
Purification method	D
qPCR PROTOCOL
Complete reaction conditions	E	See Methods
Reaction volume and amount of cDNA/DNA	E	See Methods
Primer, (probe), Mg++ and dNTP concentrations	E	See Methods
Polymerase identity and concentration	E	See Methods
Buffer/kit identity and manufacturer	E	See Methods
Exact chemical constitution of the buffer	D	See Methods
Additives (SYBR Green I, DMSO, etc.)	E	See Methods
Manufacturer of plates/tubes and catalog number	D	See Methods
Complete thermocycling parameters	E	See Methods
Reaction setup (manual/robotic)	D	See Methods
Manufacturer of qPCR instrument	E	See Methods
qPCR VALIDATION
Evidence of optimisation (from gradients)	D
Specificity (gel, sequence, melt, or digest)	E	See Methods
For SYBR Green I, Cq of the NTC	E	See Methods
Standard curves with slope and y-intercept	E	See Methods
PCR efficiency calculated from slope	E	See Methods
Confidence interval for PCR efficiency or standard error	D
r2 of standard curve	E	See Methods
Linear dynamic range	E	See Methods
Cq variation at lower limit	E	See Methods
Confidence intervals throughout range	D
Evidence for limit of detection	E	See Methods
If multiplex, efficiency and LOD of each assay.	E	See Methods
DATA ANALYSIS
qPCR analysis program (source, version)	E	See Methods
Cq method determination	E	See Methods
Outlier identification and disposition	E	See Methods
Results of NTCs	E	See Methods
Justification of number and choice of reference genes	E	See Methods
Description of normalisation method	E	See Methods
Number and concordance of biological replicates	D
Number and stage (RT or qPCR) of technical replicates	E	See Methods
Repeatability (intra-assay variation)	E	See Methods
Reproducibility (inter-assay variation, %CV)	D
Power analysis	D
Statistical methods for result significance	E	See Methods
Software (source, version)	E	See Methods
Cq or raw data submission using RDML	D
Table 1. MIQE checklist for authors, reviewers and editors. All essential information (E) must be submitted with the manuscript. Desirable
information (D) should be submitted if available. If using primers obtained from RTPrimerDB, information on qPCR target, oligonucleotides,
protocols and validation is available from that source.
*: Assessing the absence of DNA using a no RT assay is essential when first extracting RNA. Once the sample has been validated as
RDNA-free, inclusion of a no-RT control is desirable, but no longer essential.
**: Disclosure of the probe sequence is highly desirable and strongly encouraged. However, since not all commercial pre-designed assay
vendors provide this information, it cannot be an essential requirement. Use of such assays is advised against.
