# Supplementary material for: Genome-wide identification of the CYP82 gene family in cucumber and functional characterization of CsCYP82D102 in regulating resistance to powdery mildew
Source: PeerJ. 2024 Mar 28;12:e17162. doi: 10.7717/peerj.17162 (PMC10981884; doi:10.7717/peerj.17162)
Supplement: Supplemental Information 14 [file peerj-12-17162-s014.xlsx]

## Sheet: Sheet1
Csa3G852560.1	TCA-element	CCATCTTTTT	198	9	-	Nicotiana tabacum	cis-acting element involved in salicylic acid responsiveness
Csa3G852560.1	TCA-element	CCATCTTTTT	1609	9	+	Nicotiana tabacum	cis-acting element involved in salicylic acid responsiveness
Csa3G852560.1	MYC	CATTTG	215	6	+	Arabidopsis thaliana
Csa3G852560.1	MYC	CATGTG	650	6	-	Arabidopsis thaliana
Csa3G852560.1	MYC	CAATTG	1002	6	-	Arabidopsis thaliana
Csa3G852560.1	MYC	CATGTG	1185	6	-	Arabidopsis thaliana
Csa3G852560.1	MYC	CAATTG	1506	6	-	Arabidopsis thaliana
Csa3G852560.1	GT1-motif	GGTTAA	944	6	+	Arabidopsis thaliana	light responsive element
Csa3G852560.1	GT1-motif	GTGTGTGAA	994	9	-	Solanum tuberosum	light responsive element
Csa3G852560.1	GT1-motif	GGTTAAT	1056	7	-	Avena sativa	light responsive element
Csa3G852560.1	GT1-motif	GGTTAA	1057	6	-	Arabidopsis thaliana	light responsive element
Csa3G852560.1	ERE	ATTTTAAA	49	8	+	Nicotiana glutinos
Csa3G852560.1	ERE	ATTTTAAA	502	8	+	Nicotiana glutinos
Csa3G852560.1	ERE	ATTTTAAA	861	8	-	Nicotiana glutinos
Csa3G852560.1	MYB	TAACCA	205	6	-	Arabidopsis thaliana
Csa3G852560.1	MYB	CAACCA	741	6	-	Arabidopsis thaliana
Csa3G852560.1	MYB	TAACCA	943	6	-	Arabidopsis thaliana
Csa3G852560.1	MYB	TAACCA	1058	6	+	Arabidopsis thaliana
Csa3G852560.1	MYB	CAACCA	1126	6	+	Arabidopsis thaliana
Csa3G852560.1	MYB	CAACCA	1395	6	-	Arabidopsis thaliana
Csa3G852560.1	MYB	TAACCA	1738	6	-	Arabidopsis thaliana
Csa3G852560.1	AT~TATA-box	TATATA	1322	6	-	Arabidopsis thaliana
Csa3G852560.1	AT~TATA-box	TATATA	1324	6	-	Arabidopsis thaliana
Csa3G852560.1	AT~TATA-box	TATATA	1326	6	-	Arabidopsis thaliana
Csa3G852560.1	AT~TATA-box	TATATA	1328	6	-	Arabidopsis thaliana
Csa3G852560.1	AT~TATA-box	TATATA	1330	6	-	Arabidopsis thaliana
Csa3G852560.1	AT~TATA-box	TATATA	1332	6	-	Arabidopsis thaliana
Csa3G852560.1	Box 4	ATTAAT	296	6	+	Petroselinum crispum	part of a conserved DNA module involved in light responsiveness
Csa3G852560.1	Box 4	ATTAAT	1864	6	-	Petroselinum crispum	part of a conserved DNA module involved in light responsiveness
Csa3G852560.1	Box 4	ATTAAT	1868	6	-	Petroselinum crispum	part of a conserved DNA module involved in light responsiveness
Csa3G852560.1	CAAT-box	CAAT	2	4	-	Nicotiana glutinosa
Csa3G852560.1	CAAT-box	CAAAT	6	5	+	Pisum sativum	common cis-acting element in promoter and enhancer regions
Csa3G852560.1	CAAT-box	CAAT	15	4	+	Nicotiana glutinosa
Csa3G852560.1	CAAT-box	CAAT	114	4	+	Nicotiana glutinosa
Csa3G852560.1	CAAT-box	CAAAT	132	5	+	Pisum sativum	common cis-acting element in promoter and enhancer regions
Csa3G852560.1	CAAT-box	CCAAT	137	5	-	Arabidopsis thaliana	common cis-acting element in promoter and enhancer regions
Csa3G852560.1	CAAT-box	CCAAT	149	5	+	Arabidopsis thaliana	common cis-acting element in promoter and enhancer regions
Csa3G852560.1	CAAT-box	CAAT	150	4	+	Nicotiana glutinosa
Csa3G852560.1	CAAT-box	CAAAT	171	5	-	Pisum sativum	common cis-acting element in promoter and enhancer regions
Csa3G852560.1	CAAT-box	CAAAT	216	5	-	Pisum sativum	common cis-acting element in promoter and enhancer regions
Csa3G852560.1	CAAT-box	CAAT	231	4	-	Nicotiana glutinosa
Csa3G852560.1	CAAT-box	CAAT	275	4	-	Nicotiana glutinosa
Csa3G852560.1	CAAT-box	CAAT	286	4	+	Nicotiana glutinosa
Csa3G852560.1	CAAT-box	CAAT	307	4	+	Nicotiana glutinosa
Csa3G852560.1	CAAT-box	CAAAT	395	5	+	Pisum sativum	common cis-acting element in promoter and enhancer regions
Csa3G852560.1	CAAT-box	CAAT	417	4	-	Nicotiana glutinosa
Csa3G852560.1	CAAT-box	CAAAT	518	5	+	Pisum sativum	common cis-acting element in promoter and enhancer regions
Csa3G852560.1	CAAT-box	CAAAT	604	5	+	Pisum sativum	common cis-acting element in promoter and enhancer regions
Csa3G852560.1	CAAT-box	CCAAT	791	5	-	Arabidopsis thaliana	common cis-acting element in promoter and enhancer regions
Csa3G852560.1	CAAT-box	CAAT	879	4	-	Nicotiana glutinosa
Csa3G852560.1	CAAT-box	CAAT	901	4	-	Nicotiana glutinosa
Csa3G852560.1	CAAT-box	CAAT	906	4	-	Nicotiana glutinosa
Csa3G852560.1	CAAT-box	CAAT	936	4	+	Nicotiana glutinosa
Csa3G852560.1	CAAT-box	CAAT	959	4	+	Nicotiana glutinosa
Csa3G852560.1	CAAT-box	CAAT	977	4	-	Nicotiana glutinosa
Csa3G852560.1	CAAT-box	CAAT	1002	4	+	Nicotiana glutinosa
Csa3G852560.1	CAAT-box	CAAT	1004	4	-	Nicotiana glutinosa
Csa3G852560.1	CAAT-box	CAAT	1089	4	-	Nicotiana glutinosa
Csa3G852560.1	CAAT-box	CAAT	1230	4	+	Nicotiana glutinosa
Csa3G852560.1	CAAT-box	CAAT	1256	4	-	Nicotiana glutinosa
Csa3G852560.1	CAAT-box	CAAT	1378	4	-	Nicotiana glutinosa
Csa3G852560.1	CAAT-box	CAAAT	1392	5	-	Pisum sativum	common cis-acting element in promoter and enhancer regions
Csa3G852560.1	CAAT-box	CCAAT	1408	5	-	Arabidopsis thaliana	common cis-acting element in promoter and enhancer regions
Csa3G852560.1	CAAT-box	CCAAT	1428	5	-	Arabidopsis thaliana	common cis-acting element in promoter and enhancer regions
Csa3G852560.1	CAAT-box	CCAAT	1444	5	-	Arabidopsis thaliana	common cis-acting element in promoter and enhancer regions
Csa3G852560.1	CAAT-box	CAAAT	1452	5	-	Pisum sativum	common cis-acting element in promoter and enhancer regions
Csa3G852560.1	CAAT-box	CCAAT	1466	5	-	Arabidopsis thaliana	common cis-acting element in promoter and enhancer regions
Csa3G852560.1	CAAT-box	CCAAT	1483	5	+	Arabidopsis thaliana	common cis-acting element in promoter and enhancer regions
Csa3G852560.1	CAAT-box	CAAT	1484	4	+	Nicotiana glutinosa
Csa3G852560.1	CAAT-box	CAAAT	1486	5	-	Pisum sativum	common cis-acting element in promoter and enhancer regions
Csa3G852560.1	CAAT-box	CAAT	1506	4	+	Nicotiana glutinosa
Csa3G852560.1	CAAT-box	CCAAT	1508	5	-	Arabidopsis thaliana	common cis-acting element in promoter and enhancer regions
Csa3G852560.1	CAAT-box	CAAT	1540	4	-	Nicotiana glutinosa
Csa3G852560.1	CAAT-box	CAAAT	1689	5	+	Pisum sativum	common cis-acting element in promoter and enhancer regions
Csa3G852560.1	CAAT-box	CAAT	1860	4	+	Nicotiana glutinosa
Csa3G852560.1	CAAT-box	CAAT	1910	4	-	Nicotiana glutinosa
Csa3G852560.1	G-box	CACGAC	1156	6	-	Zea mays	cis-acting regulatory element involved in light responsiveness
Csa3G852560.1	ARE	AAACCA	121	6	+	Zea mays	cis-acting regulatory element essential for the anaerobic induction
Csa3G852560.1	ARE	AAACCA	1079	6	-	Zea mays	cis-acting regulatory element essential for the anaerobic induction
Csa3G852560.1	ARE	AAACCA	1678	6	-	Zea mays	cis-acting regulatory element essential for the anaerobic induction
Csa3G852560.1	TATA	TATAAAAT	333	8	+	Arabidopsis thaliana
Csa3G852560.1	TC-rich repeats	ATTCTCTAAC	1081	9	-	Nicotiana tabacum	cis-acting element involved in defense and stress responsiveness
Csa3G852560.1	TC-rich repeats	ATTCTCTAAC	1574	9	-	Nicotiana tabacum	cis-acting element involved in defense and stress responsiveness
Csa3G852560.1	TC-rich repeats	GTTTTCTTAC	1886	9	-	Nicotiana tabacum	cis-acting element involved in defense and stress responsiveness
Csa3G852560.1	MBS	CAACTG	1898	6	-	Arabidopsis thaliana	MYB binding site involved in drought-inducibility
Csa3G852560.1	MBSI	aaaAaaC(G/C)GTTA	199	10.5	+	Petunia hybrida	MYB binding site involved in flavonoid biosynthetic genes regulation
Csa3G852560.1	MBSI	aaaAaaC(G/C)GTTA	702	10.5	+	Petunia hybrida	MYB binding site involved in flavonoid biosynthetic genes regulation
Csa3G852560.1	Unnamed__1	CGTGG	1138	5	-	Zea mays
Csa3G852560.1	TCA	TCATCTTCAT	1745	9	+	Pisum sativum
Csa3G852560.1	TCA	TCATCTTCAT	1774	9	+	Pisum sativum
Csa3G852560.1	chs-CMA1a	TTACTTAA	268	8	+	Daucus carota	part of a light responsive element
Csa3G852560.1	MYB-like sequence	TAACCA	205	6	-	Arabidopsis thaliana
Csa3G852560.1	MYB-like sequence	TAACCA	943	6	-	Arabidopsis thaliana
Csa3G852560.1	MYB-like sequence	TAACCA	1058	6	+	Arabidopsis thaliana
Csa3G852560.1	MYB-like sequence	TAACCA	1738	6	-	Arabidopsis thaliana
Csa3G852560.1	AAGAA-motif	GAAAGAA	563	7	+	Avena sativa
Csa3G852560.1	AAGAA-motif	gGTAAAGAAA	620	9	+	Avena sativa
Csa3G852560.1	AAGAA-motif	gGTAAAGAAA	1616	9	-	Avena sativa
Csa3G852560.1	Myb	CAACTG	1898	6	-	Arabidopsis thaliana
Csa3G852560.1	TATA-box	ATATAA	9	6	+	Brassica oleracea	core promoter element around -30 of transcription start
Csa3G852560.1	TATA-box	TATA	10	4	+	Arabidopsis thaliana	core promoter element around -30 of transcription start
Csa3G852560.1	TATA-box	TATA	72	4	+	Arabidopsis thaliana	core promoter element around -30 of transcription start
Csa3G852560.1	TATA-box	ATATAT	108	6	+	Brassica napus	core promoter element around -30 of transcription start
Csa3G852560.1	TATA-box	TATA	109	4	+	Arabidopsis thaliana	core promoter element around -30 of transcription start
Csa3G852560.1	TATA-box	TATAA	162	5	-	Arabidopsis thaliana	core promoter element around -30 of transcription start
Csa3G852560.1	TATA-box	TATA	163	4	+	Arabidopsis thaliana	core promoter element around -30 of transcription start
Csa3G852560.1	TATA-box	TATAA	235	5	-	Arabidopsis thaliana	core promoter element around -30 of transcription start
Csa3G852560.1	TATA-box	TATA	236	4	+	Arabidopsis thaliana	core promoter element around -30 of transcription start
Csa3G852560.1	TATA-box	TATA	282	4	+	Arabidopsis thaliana	core promoter element around -30 of transcription start
Csa3G852560.1	TATA-box	TATA	333	4	+	Arabidopsis thaliana	core promoter element around -30 of transcription start
Csa3G852560.1	TATA-box	TACAAAA	372	7	+	Oryza sativa	core promoter element around -30 of transcription start
Csa3G852560.1	TATA-box	TATA	390	4	+	Arabidopsis thaliana	core promoter element around -30 of transcription start
Csa3G852560.1	TATA-box	TATA	427	4	+	Arabidopsis thaliana	core promoter element around -30 of transcription start
Csa3G852560.1	TATA-box	TATAA	469	5	-	Arabidopsis thaliana	core promoter element around -30 of transcription start
Csa3G852560.1	TATA-box	TATA	470	4	+	Arabidopsis thaliana	core promoter element around -30 of transcription start
Csa3G852560.1	TATA-box	TATA	477	4	+	Arabidopsis thaliana	core promoter element around -30 of transcription start
Csa3G852560.1	TATA-box	TATATTTATATTT	519	12	-	Avena sativa	core promoter element around -30 of transcription start
Csa3G852560.1	TATA-box	TATTTAAA	522	8	-	Arabidopsis thaliana	core promoter element around -30 of transcription start
Csa3G852560.1	TATA-box	ATATAT	527	6	+	Brassica napus	core promoter element around -30 of transcription start
Csa3G852560.1	TATA-box	TATA	528	4	+	Arabidopsis thaliana	core promoter element around -30 of transcription start
Csa3G852560.1	TATA-box	TATTTAAA	545	8	+	Arabidopsis thaliana	core promoter element around -30 of transcription start
Csa3G852560.1	TATA-box	TATAAA	659	6	-	Helianthus annuus	core promoter element around -30 of transcription start
Csa3G852560.1	TATA-box	TATAA	660	5	-	Arabidopsis thaliana	core promoter element around -30 of transcription start
Csa3G852560.1	TATA-box	TATA	661	4	+	Arabidopsis thaliana	core promoter element around -30 of transcription start
Csa3G852560.1	TATA-box	ccTATAAAaa	708	9	+	Arabidopsis thaliana	core promoter element around -30 of transcription start
Csa3G852560.1	TATA-box	TACAAAA	774	7	-	Oryza sativa	core promoter element around -30 of transcription start
Csa3G852560.1	TATA-box	TAAAGATT	799	8	-	Arabidopsis thaliana	core promoter element around -30 of transcription start
Csa3G852560.1	TATA-box	ATATAA	821	6	+	Brassica oleracea	core promoter element around -30 of transcription start
Csa3G852560.1	TATA-box	TATA	822	4	+	Arabidopsis thaliana	core promoter element around -30 of transcription start
Csa3G852560.1	TATA-box	TATA	955	4	+	Arabidopsis thaliana	core promoter element around -30 of transcription start
Csa3G852560.1	TATA-box	ATTATA	1108	6	+	Brassica napus	core promoter element around -30 of transcription start
Csa3G852560.1	TATA-box	TATAA	1109	5	-	Arabidopsis thaliana	core promoter element around -30 of transcription start
Csa3G852560.1	TATA-box	TATA	1110	4	-	Arabidopsis thaliana	core promoter element around -30 of transcription start
Csa3G852560.1	TATA-box	taTATAAAtc	1320	9	-	Arabidopsis thaliana	core promoter element around -30 of transcription start
Csa3G852560.1	TATA-box	ATATAT	1321	6	-	Brassica napus	core promoter element around -30 of transcription start
Csa3G852560.1	TATA-box	TATATA	1322	6	-	Arabidopsis thaliana	core promoter element around -30 of transcription start
Csa3G852560.1	TATA-box	ATATAT	1323	6	-	Brassica napus	core promoter element around -30 of transcription start
Csa3G852560.1	TATA-box	TATATA	1324	6	-	Arabidopsis thaliana	core promoter element around -30 of transcription start
Csa3G852560.1	TATA-box	ATATAT	1325	6	-	Brassica napus	core promoter element around -30 of transcription start
Csa3G852560.1	TATA-box	TATATA	1326	6	-	Arabidopsis thaliana	core promoter element around -30 of transcription start
Csa3G852560.1	TATA-box	ATATAT	1327	6	-	Brassica napus	core promoter element around -30 of transcription start
Csa3G852560.1	TATA-box	TATATA	1328	6	-	Arabidopsis thaliana	core promoter element around -30 of transcription start
Csa3G852560.1	TATA-box	ATATAT	1329	6	-	Brassica napus	core promoter element around -30 of transcription start
Csa3G852560.1	TATA-box	TATATA	1330	6	-	Arabidopsis thaliana	core promoter element around -30 of transcription start
Csa3G852560.1	TATA-box	ATATAT	1331	6	-	Brassica napus	core promoter element around -30 of transcription start
Csa3G852560.1	TATA-box	TATATA	1332	6	-	Arabidopsis thaliana	core promoter element around -30 of transcription start
Csa3G852560.1	TATA-box	ATATAT	1333	6	-	Brassica napus	core promoter element around -30 of transcription start
Csa3G852560.1	TATA-box	TATA	1334	4	-	Arabidopsis thaliana	core promoter element around -30 of transcription start
Csa3G852560.1	TATA-box	TATAAAA	1593	7	-	Pisum sativum	core promoter element around -30 of transcription start
Csa3G852560.1	TATA-box	TATAAA	1594	6	-	Helianthus annuus	core promoter element around -30 of transcription start
Csa3G852560.1	TATA-box	TATAA	1595	5	-	Arabidopsis thaliana	core promoter element around -30 of transcription start
Csa3G852560.1	TATA-box	TATA	1596	4	-	Arabidopsis thaliana	core promoter element around -30 of transcription start
Csa3G852560.1	TATA-box	TATA	1603	4	-	Arabidopsis thaliana	core promoter element around -30 of transcription start
Csa3G852560.1	TATA-box	TATAAGAA	1631	8	-	Zea mays	core promoter element around -30 of transcription start
Csa3G852560.1	TATA-box	TATAA	1634	5	-	Arabidopsis thaliana	core promoter element around -30 of transcription start
Csa3G852560.1	TATA-box	TATA	1635	4	-	Arabidopsis thaliana	core promoter element around -30 of transcription start
Csa3G852560.1	TATA-box	ATATAT	1725	6	-	Brassica napus	core promoter element around -30 of transcription start
Csa3G852560.1	TATA-box	TATA	1726	4	-	Arabidopsis thaliana	core promoter element around -30 of transcription start
Csa3G852560.1	TATA-box	TATA	1819	4	-	Arabidopsis thaliana	core promoter element around -30 of transcription start
Csa3G852560.1	AT-rich element	ATAGAAATCAA	1659	10	-	Glycine max	binding site of AT-rich DNA binding protein (ATBP-1)
Csa3G852560.1	chs-CMA2a	TCACTTGA	404	8	+	Petroselinum crispum	part of a light responsive element
Csa3G852560.1	Unnamed__4	CTCC	794	4	-	Petroselinum hortense
Csa3G852560.1	Unnamed__4	CTCC	1164	4	-	Petroselinum hortense
Csa3G852560.1	Unnamed__4	CTCC	1168	4	+	Petroselinum hortense
Csa3G852560.1	Unnamed__4	CTCC	1214	4	-	Petroselinum hortense
Csa3G852560.1	Unnamed__4	CTCC	1307	4	+	Petroselinum hortense
Csa3G852560.1	Unnamed__4	CTCC	1368	4	-	Petroselinum hortense
Csa3G852560.1	Unnamed__4	CTCC	1438	4	-	Petroselinum hortense
Csa3G852560.1	Unnamed__4	CTCC	1520	4	-	Petroselinum hortense
Csa3G852560.1	Unnamed__4	CTCC	1778	4	+	Petroselinum hortense
Csa3G852560.1	TGA-element	AACGAC	594	6	+	Brassica oleracea	auxin-responsive element
Csa3G852560.1	TGA-element	AACGAC	1893	6	+	Brassica oleracea	auxin-responsive element
Csa3G852560.1	TGA-element	AACGAC	1978	6	-	Brassica oleracea	auxin-responsive element
Csa3G852560.1	circadian	CAAAGATATC	1661	9	-	Lycopersicon esculentum	cis-acting regulatory element involved in circadian control
Csa3G852560.1	Unnamed__6	taTAAATATct	1319	10	-	Zea mays
Csa3G852560.1	TCT-motif	TCTTAC	266	6	+	Arabidopsis thaliana	part of a light responsive element
Csa3G852560.1	LTR	CCGAAA	1289	6	+	Hordeum vulgare	cis-acting element involved in low-temperature responsiveness
Csa3G852580.1	WUN-motif	AAATTTCCT	268	9	-	Brassica oleracea	wound-responsive element
Csa3G852580.1	WUN-motif	AAATTTCTT	271	9	+	Nicotiana glutinosa
Csa3G852580.1	WUN-motif	AAATTACT	452	8	-	Nicotiana glutinosa
Csa3G852580.1	STRE	AGGGG	1483	5	-	Arabidopsis thaliana
Csa3G852580.1	STRE	AGGGG	1581	5	-	Arabidopsis thaliana
Csa3G852580.1	STRE	AGGGG	1794	5	-	Arabidopsis thaliana
Csa3G852580.1	MYC	CATTTG	424	6	+	Arabidopsis thaliana
Csa3G852580.1	MYC	CAATTG	686	6	+	Arabidopsis thaliana
Csa3G852580.1	MYC	CATTTG	1540	6	-	Arabidopsis thaliana
Csa3G852580.1	MYC	CAATTG	1835	6	-	Arabidopsis thaliana
Csa3G852580.1	TCA-element	CCATCTTTTT	287	9	+	Nicotiana tabacum	cis-acting element involved in salicylic acid responsiveness
Csa3G852580.1	TCA-element	CCATCTTTTT	1320	9	+	Nicotiana tabacum	cis-acting element involved in salicylic acid responsiveness
Csa3G852580.1	AuxRR-core	GGTCCAT	1852	7	+	Nicotiana tabacum	cis-acting regulatory element involved in auxin responsiveness
Csa3G852580.1	CAAT-box	CAAAT	58	5	+	Pisum sativum	common cis-acting element in promoter and enhancer regions
Csa3G852580.1	CAAT-box	CAAAT	73	5	+	Pisum sativum	common cis-acting element in promoter and enhancer regions
Csa3G852580.1	CAAT-box	CAAAT	180	5	-	Pisum sativum	common cis-acting element in promoter and enhancer regions
Csa3G852580.1	CAAT-box	CAAAT	195	5	-	Pisum sativum	common cis-acting element in promoter and enhancer regions
Csa3G852580.1	CAAT-box	CAAAT	357	5	-	Pisum sativum	common cis-acting element in promoter and enhancer regions
Csa3G852580.1	CAAT-box	CAAT	366	4	-	Nicotiana glutinosa
Csa3G852580.1	CAAT-box	CAAAT	392	5	-	Pisum sativum	common cis-acting element in promoter and enhancer regions
Csa3G852580.1	CAAT-box	CAAAT	425	5	-	Pisum sativum	common cis-acting element in promoter and enhancer regions
Csa3G852580.1	CAAT-box	CAAT	629	4	-	Nicotiana glutinosa
Csa3G852580.1	CAAT-box	CAAT	686	4	+	Nicotiana glutinosa
Csa3G852580.1	CAAT-box	CAAT	688	4	-	Nicotiana glutinosa
Csa3G852580.1	CAAT-box	CCAAT	696	5	-	Arabidopsis thaliana	common cis-acting element in promoter and enhancer regions
Csa3G852580.1	CAAT-box	CAAT	769	4	-	Nicotiana glutinosa
Csa3G852580.1	CAAT-box	CAAT	877	4	+	Nicotiana glutinosa
Csa3G852580.1	CAAT-box	CCAAT	884	5	+	Arabidopsis thaliana	common cis-acting element in promoter and enhancer regions
Csa3G852580.1	CAAT-box	CAAT	885	4	+	Nicotiana glutinosa
Csa3G852580.1	CAAT-box	CAAT	917	4	+	Nicotiana glutinosa
Csa3G852580.1	CAAT-box	CAAT	934	4	+	Nicotiana glutinosa
Csa3G852580.1	CAAT-box	CAAT	943	4	-	Nicotiana glutinosa
Csa3G852580.1	CAAT-box	CAAT	951	4	+	Nicotiana glutinosa
Csa3G852580.1	CAAT-box	CAAT	989	4	+	Nicotiana glutinosa
Csa3G852580.1	CAAT-box	CAAAT	1058	5	+	Pisum sativum	common cis-acting element in promoter and enhancer regions
Csa3G852580.1	CAAT-box	CAAT	1067	4	+	Nicotiana glutinosa
Csa3G852580.1	CAAT-box	CCAAT	1077	5	+	Arabidopsis thaliana	common cis-acting element in promoter and enhancer regions
Csa3G852580.1	CAAT-box	CAAT	1078	4	+	Nicotiana glutinosa
Csa3G852580.1	CAAT-box	CAAT	1082	4	-	Nicotiana glutinosa
Csa3G852580.1	CAAT-box	CAAT	1095	4	+	Nicotiana glutinosa
Csa3G852580.1	CAAT-box	CAAAT	1127	5	-	Pisum sativum	common cis-acting element in promoter and enhancer regions
Csa3G852580.1	CAAT-box	CAAT	1162	4	-	Nicotiana glutinosa
Csa3G852580.1	CAAT-box	CAAT	1177	4	-	Nicotiana glutinosa
Csa3G852580.1	CAAT-box	CAAAT	1359	5	+	Pisum sativum	common cis-acting element in promoter and enhancer regions
Csa3G852580.1	CAAT-box	CAAAT	1540	5	+	Pisum sativum	common cis-acting element in promoter and enhancer regions
Csa3G852580.1	CAAT-box	CAAT	1576	4	-	Nicotiana glutinosa
Csa3G852580.1	CAAT-box	CAAT	1728	4	-	Nicotiana glutinosa
Csa3G852580.1	CAAT-box	CCAAT	1750	5	+	Arabidopsis thaliana	common cis-acting element in promoter and enhancer regions
Csa3G852580.1	CAAT-box	CAAT	1751	4	+	Nicotiana glutinosa
Csa3G852580.1	CAAT-box	CAAAT	1753	5	-	Pisum sativum	common cis-acting element in promoter and enhancer regions
Csa3G852580.1	CAAT-box	CAAT	1779	4	-	Nicotiana glutinosa
Csa3G852580.1	CAAT-box	CCAAT	1803	5	+	Arabidopsis thaliana	common cis-acting element in promoter and enhancer regions
Csa3G852580.1	CAAT-box	CAAT	1804	4	+	Nicotiana glutinosa
Csa3G852580.1	CAAT-box	CAAAT	1806	5	-	Pisum sativum	common cis-acting element in promoter and enhancer regions
Csa3G852580.1	CAAT-box	CAAT	1835	4	+	Nicotiana glutinosa
Csa3G852580.1	CAAT-box	CAAT	1837	4	-	Nicotiana glutinosa
Csa3G852580.1	CAAT-box	CAAT	1862	4	-	Nicotiana glutinosa
Csa3G852580.1	CAAT-box	CCAAT	1941	5	+	Arabidopsis thaliana	common cis-acting element in promoter and enhancer regions
Csa3G852580.1	CAAT-box	CAAT	1942	4	+	Nicotiana glutinosa
Csa3G852580.1	CAAT-box	CCAAT	1976	5	-	Arabidopsis thaliana	common cis-acting element in promoter and enhancer regions
Csa3G852580.1	AT~TATA-box	TATATA	786	6	+	Arabidopsis thaliana
Csa3G852580.1	AT~TATA-box	TATATA	893	6	+	Arabidopsis thaliana
Csa3G852580.1	AT~TATA-box	TATATA	1012	6	-	Arabidopsis thaliana
Csa3G852580.1	AT~TATA-box	TATATA	1152	6	-	Arabidopsis thaliana
Csa3G852580.1	Box 4	ATTAAT	667	6	+	Petroselinum crispum	part of a conserved DNA module involved in light responsiveness
Csa3G852580.1	Box 4	ATTAAT	1914	6	-	Petroselinum crispum	part of a conserved DNA module involved in light responsiveness
Csa3G852580.1	MYB	TAACCA	507	6	-	Arabidopsis thaliana
Csa3G852580.1	MYB	CAACAG	535	6	-	Arabidopsis thaliana
Csa3G852580.1	MYB	CAACCA	1597	6	+	Arabidopsis thaliana
Csa3G852580.1	MYB	TAACCA	1938	6	+	Arabidopsis thaliana
Csa3G852580.1	GT1-motif	GGTTAA	508	6	+	Arabidopsis thaliana	light responsive element
Csa3G852580.1	ERE	ATTTTAAA	523	8	+	Nicotiana glutinos
Csa3G852580.1	ERE	ATTTTAAA	1139	8	-	Nicotiana glutinos
Csa3G852580.1	ERE	ATTTTAAA	1376	8	-	Nicotiana glutinos
Csa3G852580.1	ERE	ATTTTAAA	1399	8	+	Nicotiana glutinos
Csa3G852580.1	ERE	ATTTTAAA	1867	8	-	Nicotiana glutinos
Csa3G852580.1	TGA-box	TGACGTAA	1530	8	+	Glycine max	part of an auxin-responsive element
Csa3G852580.1	AT~ABRE	TACGTGTC	1662	8	+	Arabidopsis thaliana
Csa3G852580.1	AT~ABRE	TACGTGTC	1677	8	+	Arabidopsis thaliana
Csa3G852580.1	ABRE3a	TACGTG	1662	6	+	Zea mays
Csa3G852580.1	ABRE3a	TACGTG	1677	6	+	Zea mays
Csa3G852580.1	AT-rich sequence	TAAAATACT	1388	9	+	Pisum sativum	element for maximal elicitor-mediated activation (2copies)
Csa3G852580.1	AT-rich sequence	TAAAATACT	1467	9	+	Pisum sativum	element for maximal elicitor-mediated activation (2copies)
Csa3G852580.1	ABRE4	CACGTA	1662	6	-	Zea mays
Csa3G852580.1	ABRE4	CACGTA	1677	6	-	Zea mays
Csa3G852580.1	Myb-binding site	CAACAG	535	6	-	Nicotiana tabacum
Csa3G852580.1	G-box	CACGAC	1314	6	+	Zea mays	cis-acting regulatory element involved in light responsiveness
Csa3G852580.1	G-box	TACGTG	1662	6	+	Arabidopsis thaliana	cis-acting regulatory element involved in light responsiveness
Csa3G852580.1	G-box	TACGTG	1677	6	+	Arabidopsis thaliana	cis-acting regulatory element involved in light responsiveness
Csa3G852580.1	MBSI	TTTTTACGGTTA	974	11	-	Petunia hybrida	MYB binding site involved in flavonoid biosynthetic genes regulation
Csa3G852580.1	MBS	CAACTG	1950	6	+	Arabidopsis thaliana	MYB binding site involved in drought-inducibility
Csa3G852580.1	TATA	TATAAAAT	1429	8	+	Arabidopsis thaliana
Csa3G852580.1	TC-rich repeats	GTTTTCTTAC	1562	9	-	Nicotiana tabacum	cis-acting element involved in defense and stress responsiveness
Csa3G852580.1	ARE	AAACCA	321	6	-	Zea mays	cis-acting regulatory element essential for the anaerobic induction
Csa3G852580.1	ARE	AAACCA	407	6	-	Zea mays	cis-acting regulatory element essential for the anaerobic induction
Csa3G852580.1	ARE	AAACCA	1774	6	+	Zea mays	cis-acting regulatory element essential for the anaerobic induction
Csa3G852580.1	ARE	AAACCA	1884	6	+	Zea mays	cis-acting regulatory element essential for the anaerobic induction
Csa3G852580.1	as-1	TGACG	1530	5	+	Arabidopsis thaliana
Csa3G852580.1	as-1	TGACG	1615	5	-	Arabidopsis thaliana
Csa3G852580.1	as-1	TGACG	1904	5	+	Arabidopsis thaliana
Csa3G852580.1	CGTCA-motif	CGTCA	1530	5	-	Hordeum vulgare	cis-acting regulatory element involved in the MeJA-responsiveness
Csa3G852580.1	CGTCA-motif	CGTCA	1615	5	+	Hordeum vulgare	cis-acting regulatory element involved in the MeJA-responsiveness
Csa3G852580.1	CGTCA-motif	CGTCA	1904	5	-	Hordeum vulgare	cis-acting regulatory element involved in the MeJA-responsiveness
Csa3G852580.1	TGACG-motif	TGACG	1530	5	+	Hordeum vulgare	cis-acting regulatory element involved in the MeJA-responsiveness
Csa3G852580.1	TGACG-motif	TGACG	1615	5	-	Hordeum vulgare	cis-acting regulatory element involved in the MeJA-responsiveness
Csa3G852580.1	TGACG-motif	TGACG	1904	5	+	Hordeum vulgare	cis-acting regulatory element involved in the MeJA-responsiveness
Csa3G852580.1	TCCC-motif	TCTCCCT	1898	7	+	Spinacia oleracea	part of a light responsive element
Csa3G852580.1	chs-CMA1a	TTACTTAA	851	8	+	Daucus carota	part of a light responsive element
Csa3G852580.1	Gap-box	CAAATGAA(A/G)A	420	9.5	-	Arabidopsis thaliana	part of a light responsive element
Csa3G852580.1	MYB-like sequence	TAACCA	507	6	-	Arabidopsis thaliana
Csa3G852580.1	MYB-like sequence	TAACCA	1938	6	+	Arabidopsis thaliana
Csa3G852580.1	AAGAA-motif	gGTAAAGAAA	1449	10	+	Avena sativa
Csa3G852580.1	AAGAA-motif	GAAAGAA	1562	7	+	Avena sativa
Csa3G852580.1	Unnamed__4	CTCC	135	4	+	Petroselinum hortense
Csa3G852580.1	Unnamed__4	CTCC	174	4	-	Petroselinum hortense
Csa3G852580.1	Unnamed__4	CTCC	543	4	-	Petroselinum hortense
Csa3G852580.1	Unnamed__4	CTCC	606	4	-	Petroselinum hortense
Csa3G852580.1	Unnamed__4	CTCC	656	4	-	Petroselinum hortense
Csa3G852580.1	Unnamed__4	CTCC	673	4	-	Petroselinum hortense
Csa3G852580.1	Unnamed__4	CTCC	1644	4	+	Petroselinum hortense
Csa3G852580.1	Unnamed__4	CTCC	1842	4	+	Petroselinum hortense
Csa3G852580.1	Unnamed__4	CTCC	1899	4	+	Petroselinum hortense
Csa3G852580.1	Unnamed__4	CCCACAGGC	1986	9	+	Zea mays
Csa3G852580.1	Sp1	GGGCGG	572	6	+	Oryza sativa	light responsive element
Csa3G852580.1	TATA-box	TATA	1	4	+	Arabidopsis thaliana	core promoter element around -30 of transcription start
Csa3G852580.1	TATA-box	TATA	192	4	+	Arabidopsis thaliana	core promoter element around -30 of transcription start
Csa3G852580.1	TATA-box	ATTATA	784	6	+	Brassica napus	core promoter element around -30 of transcription start
Csa3G852580.1	TATA-box	TATATAA	785	7	-	Arabidopsis thaliana	core promoter element around -30 of transcription start
Csa3G852580.1	TATA-box	TATATA	786	6	+	Arabidopsis thaliana	core promoter element around -30 of transcription start
Csa3G852580.1	TATA-box	ATATAA	787	6	+	Brassica oleracea	core promoter element around -30 of transcription start
Csa3G852580.1	TATA-box	TATA	788	4	+	Arabidopsis thaliana	core promoter element around -30 of transcription start
Csa3G852580.1	TATA-box	TATA	888	4	+	Arabidopsis thaliana	core promoter element around -30 of transcription start
Csa3G852580.1	TATA-box	TATATA	893	6	+	Arabidopsis thaliana	core promoter element around -30 of transcription start
Csa3G852580.1	TATA-box	ATATAA	894	6	+	Brassica oleracea	core promoter element around -30 of transcription start
Csa3G852580.1	TATA-box	TATA	895	4	+	Arabidopsis thaliana	core promoter element around -30 of transcription start
Csa3G852580.1	TATA-box	ATATAT	983	6	+	Brassica napus	core promoter element around -30 of transcription start
Csa3G852580.1	TATA-box	TATA	984	4	+	Arabidopsis thaliana	core promoter element around -30 of transcription start
Csa3G852580.1	TATA-box	TATATA	1012	6	-	Arabidopsis thaliana	core promoter element around -30 of transcription start
Csa3G852580.1	TATA-box	ATATAA	1013	6	+	Brassica oleracea	core promoter element around -30 of transcription start
Csa3G852580.1	TATA-box	TATA	1014	4	-	Arabidopsis thaliana	core promoter element around -30 of transcription start
Csa3G852580.1	TATA-box	TATTTAAA	1022	8	+	Arabidopsis thaliana	core promoter element around -30 of transcription start
Csa3G852580.1	TATA-box	TACAAAA	1034	7	-	Oryza sativa	core promoter element around -30 of transcription start
Csa3G852580.1	TATA-box	TATA	1043	4	-	Arabidopsis thaliana	core promoter element around -30 of transcription start
Csa3G852580.1	TATA-box	ATATAT	1113	6	-	Brassica napus	core promoter element around -30 of transcription start
Csa3G852580.1	TATA-box	TATA	1114	4	-	Arabidopsis thaliana	core promoter element around -30 of transcription start
Csa3G852580.1	TATA-box	TATA	1124	4	-	Arabidopsis thaliana	core promoter element around -30 of transcription start
Csa3G852580.1	TATA-box	TATATAA	1151	7	-	Arabidopsis thaliana	core promoter element around -30 of transcription start
Csa3G852580.1	TATA-box	TATATA	1152	6	-	Arabidopsis thaliana	core promoter element around -30 of transcription start
Csa3G852580.1	TATA-box	TATA	1154	4	-	Arabidopsis thaliana	core promoter element around -30 of transcription start
Csa3G852580.1	TATA-box	TATAAAT	1186	7	-	Brassica juncea	core promoter element around -30 of transcription start
Csa3G852580.1	TATA-box	TATAAA	1187	6	-	Helianthus annuus	core promoter element around -30 of transcription start
Csa3G852580.1	TATA-box	TATAA	1188	5	-	Arabidopsis thaliana	core promoter element around -30 of transcription start
Csa3G852580.1	TATA-box	TATA	1189	4	-	Arabidopsis thaliana	core promoter element around -30 of transcription start
Csa3G852580.1	TATA-box	TACATAAA	1215	8	-	Oryza sativa	core promoter element around -30 of transcription start
Csa3G852580.1	TATA-box	ATATAT	1245	6	-	Brassica napus	core promoter element around -30 of transcription start
Csa3G852580.1	TATA-box	TATA	1246	4	-	Arabidopsis thaliana	core promoter element around -30 of transcription start
Csa3G852580.1	TATA-box	ATATAA	1252	6	+	Brassica oleracea	core promoter element around -30 of transcription start
Csa3G852580.1	TATA-box	TATA	1253	4	-	Arabidopsis thaliana	core promoter element around -30 of transcription start
Csa3G852580.1	TATA-box	TATA	1305	4	-	Arabidopsis thaliana	core promoter element around -30 of transcription start
Csa3G852580.1	TATA-box	TATAAAA	1326	7	-	Pisum sativum	core promoter element around -30 of transcription start
Csa3G852580.1	TATA-box	TATAAA	1327	6	-	Helianthus annuus	core promoter element around -30 of transcription start
Csa3G852580.1	TATA-box	TATAA	1328	5	-	Arabidopsis thaliana	core promoter element around -30 of transcription start
Csa3G852580.1	TATA-box	TATA	1329	4	-	Arabidopsis thaliana	core promoter element around -30 of transcription start
Csa3G852580.1	TATA-box	TATTTAAA	1374	8	+	Arabidopsis thaliana	core promoter element around -30 of transcription start
Csa3G852580.1	TATA-box	TATAAATA	1425	8	-	Daucus carota	core promoter element around -30 of transcription start
Csa3G852580.1	TATA-box	TATAAAT	1426	7	-	Brassica juncea	core promoter element around -30 of transcription start
Csa3G852580.1	TATA-box	TATAAA	1427	6	-	Helianthus annuus	core promoter element around -30 of transcription start
Csa3G852580.1	TATA-box	TATAA	1428	5	-	Arabidopsis thaliana	core promoter element around -30 of transcription start
Csa3G852580.1	TATA-box	TATA	1429	4	-	Arabidopsis thaliana	core promoter element around -30 of transcription start
Csa3G852580.1	TATA-box	TATA	1846	4	-	Arabidopsis thaliana	core promoter element around -30 of transcription start
Csa3G852580.1	AT-rich element	ATAGAAATCAA	1260	10	+	Glycine max	binding site of AT-rich DNA binding protein (ATBP-1)
Csa3G852580.1	Myb	CAACTG	1950	6	+	Arabidopsis thaliana
Csa3G852580.1	ABRE	TACGTGTC	1662	8	+	Oryza sativa	cis-acting element involved in the abscisic acid responsiveness
Csa3G852580.1	ABRE	ACGTG	1663	5	+	Arabidopsis thaliana	cis-acting element involved in the abscisic acid responsiveness
Csa3G852580.1	ABRE	TACGTGTC	1677	8	+	Oryza sativa	cis-acting element involved in the abscisic acid responsiveness
Csa3G852580.1	ABRE	ACGTG	1678	5	+	Arabidopsis thaliana	cis-acting element involved in the abscisic acid responsiveness
Csa3G852580.1	Unnamed__6	taTAAATATct	788	10	+	Zea mays
Csa3G852580.1	TCT-motif	TCTTAC	777	6	-	Arabidopsis thaliana	part of a light responsive element
Csa3G852580.1	circadian	CAAAGATATC	922	9	-	Lycopersicon esculentum	cis-acting regulatory element involved in circadian control
Csa3G852580.1	circadian	CAAAGATATC	1920	9	-	Lycopersicon esculentum	cis-acting regulatory element involved in circadian control
Csa3G852590.1	MYB	TAACCA	944	6	-	Arabidopsis thaliana
Csa3G852590.1	MYB	TAACCA	994	6	+	Arabidopsis thaliana
Csa3G852590.1	MYB	CAACCA	1372	6	-	Arabidopsis thaliana
Csa3G852590.1	MYB	CAACCA	1902	6	-	Arabidopsis thaliana
Csa3G852590.1	Box 4	ATTAAT	81	6	+	Petroselinum crispum	part of a conserved DNA module involved in light responsiveness
Csa3G852590.1	Box 4	ATTAAT	280	6	+	Petroselinum crispum	part of a conserved DNA module involved in light responsiveness
Csa3G852590.1	Box 4	ATTAAT	389	6	+	Petroselinum crispum	part of a conserved DNA module involved in light responsiveness
Csa3G852590.1	Box 4	ATTAAT	1100	6	-	Petroselinum crispum	part of a conserved DNA module involved in light responsiveness
Csa3G852590.1	Box 4	ATTAAT	1314	6	-	Petroselinum crispum	part of a conserved DNA module involved in light responsiveness
Csa3G852590.1	Box 4	ATTAAT	1694	6	-	Petroselinum crispum	part of a conserved DNA module involved in light responsiveness
Csa3G852590.1	AT~TATA-box	TATATAAA	690	8	-	Arabidopsis thaliana
Csa3G852590.1	AT~TATA-box	TATATA	692	6	+	Arabidopsis thaliana
Csa3G852590.1	AT~TATA-box	TATATA	694	6	+	Arabidopsis thaliana
Csa3G852590.1	AT~TATA-box	TATATA	707	6	+	Arabidopsis thaliana
Csa3G852590.1	CAAT-box	CAAT	126	4	-	Nicotiana glutinosa
Csa3G852590.1	CAAT-box	CAAT	136	4	-	Nicotiana glutinosa
Csa3G852590.1	CAAT-box	CAAT	367	4	+	Nicotiana glutinosa
Csa3G852590.1	CAAT-box	CAAAT	372	5	-	Pisum sativum	common cis-acting element in promoter and enhancer regions
Csa3G852590.1	CAAT-box	CAAT	415	4	-	Nicotiana glutinosa
Csa3G852590.1	CAAT-box	CAAT	424	4	-	Nicotiana glutinosa
Csa3G852590.1	CAAT-box	CAAT	464	4	-	Nicotiana glutinosa
Csa3G852590.1	CAAT-box	CAAT	469	4	-	Nicotiana glutinosa
Csa3G852590.1	CAAT-box	CAAT	473	4	-	Nicotiana glutinosa
Csa3G852590.1	CAAT-box	CAAT	538	4	+	Nicotiana glutinosa
Csa3G852590.1	CAAT-box	CAAAT	542	5	+	Pisum sativum	common cis-acting element in promoter and enhancer regions
Csa3G852590.1	CAAT-box	CAAAT	716	5	+	Pisum sativum	common cis-acting element in promoter and enhancer regions
Csa3G852590.1	CAAT-box	CAAAT	777	5	+	Pisum sativum	common cis-acting element in promoter and enhancer regions
Csa3G852590.1	CAAT-box	CAAT	793	4	-	Nicotiana glutinosa
Csa3G852590.1	CAAT-box	CAAAT	812	5	+	Pisum sativum	common cis-acting element in promoter and enhancer regions
Csa3G852590.1	CAAT-box	CCAAT	847	5	-	Arabidopsis thaliana	common cis-acting element in promoter and enhancer regions
Csa3G852590.1	CAAT-box	CCAAT	855	5	+	Arabidopsis thaliana	common cis-acting element in promoter and enhancer regions
Csa3G852590.1	CAAT-box	CAAT	856	4	+	Nicotiana glutinosa
Csa3G852590.1	CAAT-box	CAAAT	863	5	+	Pisum sativum	common cis-acting element in promoter and enhancer regions
Csa3G852590.1	CAAT-box	CAAAT	920	5	-	Pisum sativum	common cis-acting element in promoter and enhancer regions
Csa3G852590.1	CAAT-box	CAAAT	941	5	-	Pisum sativum	common cis-acting element in promoter and enhancer regions
Csa3G852590.1	CAAT-box	CAAT	954	4	-	Nicotiana glutinosa
Csa3G852590.1	CAAT-box	CAAAT	964	5	+	Pisum sativum	common cis-acting element in promoter and enhancer regions
Csa3G852590.1	CAAT-box	CCAAT	978	5	-	Arabidopsis thaliana	common cis-acting element in promoter and enhancer regions
Csa3G852590.1	CAAT-box	CAAAT	998	5	+	Pisum sativum	common cis-acting element in promoter and enhancer regions
Csa3G852590.1	CAAT-box	CAAT	1021	4	+	Nicotiana glutinosa
Csa3G852590.1	CAAT-box	CAAAT	1045	5	-	Pisum sativum	common cis-acting element in promoter and enhancer regions
Csa3G852590.1	CAAT-box	CCAAT	1097	5	+	Arabidopsis thaliana	common cis-acting element in promoter and enhancer regions
Csa3G852590.1	CAAT-box	CAAT	1098	4	+	Nicotiana glutinosa
Csa3G852590.1	CAAT-box	CCAAT	1104	5	-	Arabidopsis thaliana	common cis-acting element in promoter and enhancer regions
Csa3G852590.1	CAAT-box	CAAT	1111	4	-	Nicotiana glutinosa
Csa3G852590.1	CAAT-box	CAAT	1138	4	-	Nicotiana glutinosa
Csa3G852590.1	CAAT-box	CAAT	1171	4	-	Nicotiana glutinosa
Csa3G852590.1	CAAT-box	CAAT	1225	4	+	Nicotiana glutinosa
Csa3G852590.1	CAAT-box	CAAT	1240	4	+	Nicotiana glutinosa
Csa3G852590.1	CAAT-box	CAAAT	1295	5	+	Pisum sativum	common cis-acting element in promoter and enhancer regions
Csa3G852590.1	CAAT-box	CAAT	1358	4	-	Nicotiana glutinosa
Csa3G852590.1	CAAT-box	CAAT	1382	4	-	Nicotiana glutinosa
Csa3G852590.1	CAAT-box	CAAT	1420	4	+	Nicotiana glutinosa
Csa3G852590.1	CAAT-box	CCAAT	1478	5	+	Arabidopsis thaliana	common cis-acting element in promoter and enhancer regions
Csa3G852590.1	CAAT-box	CAAT	1479	4	+	Nicotiana glutinosa
Csa3G852590.1	CAAT-box	CAAT	1544	4	-	Nicotiana glutinosa
Csa3G852590.1	CAAT-box	CAAT	1559	4	-	Nicotiana glutinosa
Csa3G852590.1	CAAT-box	CAAT	1668	4	+	Nicotiana glutinosa
Csa3G852590.1	CAAT-box	CCAAT	1670	5	-	Arabidopsis thaliana	common cis-acting element in promoter and enhancer regions
Csa3G852590.1	CAAT-box	CAAT	1684	4	-	Nicotiana glutinosa
Csa3G852590.1	CAAT-box	CAAAT	1701	5	+	Pisum sativum	common cis-acting element in promoter and enhancer regions
Csa3G852590.1	CAAT-box	CAAT	1752	4	-	Nicotiana glutinosa
Csa3G852590.1	CAAT-box	CAAT	1791	4	-	Nicotiana glutinosa
Csa3G852590.1	CAAT-box	CAAT	1805	4	-	Nicotiana glutinosa
Csa3G852590.1	CAAT-box	CAAT	1824	4	+	Nicotiana glutinosa
Csa3G852590.1	CAAT-box	CAAT	1848	4	+	Nicotiana glutinosa
Csa3G852590.1	CAAT-box	CAAT	1886	4	-	Nicotiana glutinosa
Csa3G852590.1	CAAT-box	CAAAT	1897	5	-	Pisum sativum	common cis-acting element in promoter and enhancer regions
Csa3G852590.1	CAAT-box	CAAT	1915	4	-	Nicotiana glutinosa
Csa3G852590.1	CAAT-box	CCAAT	1954	5	+	Arabidopsis thaliana	common cis-acting element in promoter and enhancer regions
Csa3G852590.1	CAAT-box	CAAT	1955	4	+	Nicotiana glutinosa
Csa3G852590.1	ERE	ATTTTAAA	449	8	+	Nicotiana glutinos
Csa3G852590.1	ERE	ATTTTAAA	1023	8	+	Nicotiana glutinos
Csa3G852590.1	ERE	ATTTTAAA	1517	8	+	Nicotiana glutinos
Csa3G852590.1	ERE	ATTTTAAA	1519	8	-	Nicotiana glutinos
Csa3G852590.1	GT1-motif	GGTTAA	993	6	-	Arabidopsis thaliana	light responsive element
Csa3G852590.1	STRE	AGGGG	566	5	+	Arabidopsis thaliana
Csa3G852590.1	P-box	CCTTTTG	646	7	-	Oryza sativa	gibberellin-responsive element
Csa3G852590.1	O2-site	GTTGACGTGA	1904	10	+	Zea mays	cis-acting regulatory element involved in zein metabolism regulation
Csa3G852590.1	MYC	CATTTG	777	6	-	Arabidopsis thaliana
Csa3G852590.1	MYC	CATTTG	919	6	+	Arabidopsis thaliana
Csa3G852590.1	MYC	CAATTG	1668	6	-	Arabidopsis thaliana
Csa3G852590.1	CGTCA-motif	CGTCA	1906	5	-	Hordeum vulgare	cis-acting regulatory element involved in the MeJA-responsiveness
Csa3G852590.1	TGACG-motif	TGACG	1906	5	+	Hordeum vulgare	cis-acting regulatory element involved in the MeJA-responsiveness
Csa3G852590.1	as-1	TGACG	1906	5	+	Arabidopsis thaliana
Csa3G852590.1	ARE	AAACCA	1214	6	-	Zea mays	cis-acting regulatory element essential for the anaerobic induction
Csa3G852590.1	ARE	AAACCA	1951	6	+	Zea mays	cis-acting regulatory element essential for the anaerobic induction
Csa3G852590.1	TC-rich repeats	ATTCTCTAAC	441	10	-	Nicotiana tabacum	cis-acting element involved in defense and stress responsiveness
Csa3G852590.1	TC-rich repeats	ATTCTCTAAC	556	9	-	Nicotiana tabacum	cis-acting element involved in defense and stress responsiveness
Csa3G852590.1	TC-rich repeats	GTTTTCTTAC	629	9	-	Nicotiana tabacum	cis-acting element involved in defense and stress responsiveness
Csa3G852590.1	TATA	TATAAAAT	1983	8	-	Arabidopsis thaliana
Csa3G852590.1	AACA_motif	TAACAAACTCCA	1384	11	-	Oryza sativa	involved in endosperm-specific negative expression
Csa3G852590.1	MRE	AACCTAA	1273	7	+	Petroselinum crispum	MYB binding site involved in light responsiveness
Csa3G852590.1	G-box	CACGTC	1907	6	-	Zea mays	cis-acting regulatory element involved in light responsiveness
Csa3G852590.1	MYB-like sequence	TAACCA	944	6	-	Arabidopsis thaliana
Csa3G852590.1	MYB-like sequence	TAACCA	994	6	+	Arabidopsis thaliana
Csa3G852590.1	AAGAA-motif	GAAAGAA	139	7	+	Avena sativa
Csa3G852590.1	GATA-motif	AAGATAAGATT	311	10	-	Arabidopsis thaliana	part of a light responsive element
Csa3G852590.1	GATA-motif	AAGATAAGATT	316	10	-	Arabidopsis thaliana	part of a light responsive element
Csa3G852590.1	GATA-motif	AAGGATAAGG	1812	9	+	Solanum tuberosum	part of a light responsive element
Csa3G852590.1	chs-CMA1a	TTACTTAA	179	8	-	Daucus carota	part of a light responsive element
Csa3G852590.1	Unnamed__1	GAATTTAATTAA	510	11	+	Glycine max	60K protein binding site
Csa3G852590.1	W box	TTGACC	1359	6	+	Arabidopsis thaliana
Csa3G852590.1	ABRE	ACGTG	1908	5	+	Arabidopsis thaliana	cis-acting element involved in the abscisic acid responsiveness
Csa3G852590.1	I-box	AGATAAGG	1814	8	+	Triticum aestivum	part of a light responsive element
Csa3G852590.1	TGA-element	AACGAC	1834	6	-	Brassica oleracea	auxin-responsive element
Csa3G852590.1	Unnamed__6	taTAAATATct	405	10	-	Zea mays
Csa3G852590.1	Unnamed__6	taTAAATATct	1699	10	+	Zea mays
Csa3G852590.1	TCT-motif	TCTTAC	629	6	-	Arabidopsis thaliana	part of a light responsive element
Csa3G852590.1	TCT-motif	TCTTAC	1617	6	+	Arabidopsis thaliana	part of a light responsive element
Csa3G852590.1	Unnamed__4	CTCC	31	4	+	Petroselinum hortense
Csa3G852590.1	Unnamed__4	CTCC	242	4	+	Petroselinum hortense
Csa3G852590.1	Unnamed__4	CTCC	271	4	+	Petroselinum hortense
Csa3G852590.1	Unnamed__4	CTCC	593	4	-	Petroselinum hortense
Csa3G852590.1	Unnamed__4	CTCC	684	4	-	Petroselinum hortense
Csa3G852590.1	Unnamed__4	CTCC	1622	4	+	Petroselinum hortense
Csa3G852590.1	Unnamed__4	CTCC	1710	4	-	Petroselinum hortense
Csa3G852590.1	Unnamed__4	CTCC	1993	4	+	Petroselinum hortense
Csa3G852590.1	TATA-box	ATTATA	87	6	+	Brassica napus	core promoter element around -30 of transcription start
Csa3G852590.1	TATA-box	TATAA	88	5	-	Arabidopsis thaliana	core promoter element around -30 of transcription start
Csa3G852590.1	TATA-box	TATA	89	4	+	Arabidopsis thaliana	core promoter element around -30 of transcription start
Csa3G852590.1	TATA-box	ATTATA	100	6	+	Brassica napus	core promoter element around -30 of transcription start
Csa3G852590.1	TATA-box	TATAA	101	5	-	Arabidopsis thaliana	core promoter element around -30 of transcription start
Csa3G852590.1	TATA-box	TATA	102	4	+	Arabidopsis thaliana	core promoter element around -30 of transcription start
Csa3G852590.1	TATA-box	ATTATA	118	6	+	Brassica napus	core promoter element around -30 of transcription start
Csa3G852590.1	TATA-box	TATAA	119	5	-	Arabidopsis thaliana	core promoter element around -30 of transcription start
Csa3G852590.1	TATA-box	TATA	120	4	+	Arabidopsis thaliana	core promoter element around -30 of transcription start
Csa3G852590.1	TATA-box	TATA	187	4	+	Arabidopsis thaliana	core promoter element around -30 of transcription start
Csa3G852590.1	TATA-box	taTATAAAtc	218	9	+	Arabidopsis thaliana	core promoter element around -30 of transcription start
Csa3G852590.1	TATA-box	TATAAATA	408	8	-	Daucus carota	core promoter element around -30 of transcription start
Csa3G852590.1	TATA-box	TATAAAT	409	7	-	Brassica juncea	core promoter element around -30 of transcription start
Csa3G852590.1	TATA-box	TATAAA	410	6	-	Helianthus annuus	core promoter element around -30 of transcription start
Csa3G852590.1	TATA-box	TATAA	411	5	-	Arabidopsis thaliana	core promoter element around -30 of transcription start
Csa3G852590.1	TATA-box	TATA	412	4	+	Arabidopsis thaliana	core promoter element around -30 of transcription start
Csa3G852590.1	TATA-box	ccTATAAAaa	482	10	+	Arabidopsis thaliana	core promoter element around -30 of transcription start
Csa3G852590.1	TATA-box	TATA	484	4	+	Arabidopsis thaliana	core promoter element around -30 of transcription start
Csa3G852590.1	TATA-box	TATAA	639	5	-	Arabidopsis thaliana	core promoter element around -30 of transcription start
Csa3G852590.1	TATA-box	TATA	640	4	+	Arabidopsis thaliana	core promoter element around -30 of transcription start
Csa3G852590.1	TATA-box	TATA	680	4	+	Arabidopsis thaliana	core promoter element around -30 of transcription start
Csa3G852590.1	TATA-box	TATAAAA	689	7	-	Pisum sativum	core promoter element around -30 of transcription start
Csa3G852590.1	TATA-box	TATAAA	690	6	-	Helianthus annuus	core promoter element around -30 of transcription start
Csa3G852590.1	TATA-box	TATATAA	691	7	-	Arabidopsis thaliana	core promoter element around -30 of transcription start
Csa3G852590.1	TATA-box	TATATA	692	6	+	Arabidopsis thaliana	core promoter element around -30 of transcription start
Csa3G852590.1	TATA-box	ATATAT	693	6	+	Brassica napus	core promoter element around -30 of transcription start
Csa3G852590.1	TATA-box	TATATA	694	6	+	Arabidopsis thaliana	core promoter element around -30 of transcription start
Csa3G852590.1	TATA-box	TATA	696	4	+	Arabidopsis thaliana	core promoter element around -30 of transcription start
Csa3G852590.1	TATA-box	TATA	701	4	+	Arabidopsis thaliana	core promoter element around -30 of transcription start
Csa3G852590.1	TATA-box	ATATAT	706	6	+	Brassica napus	core promoter element around -30 of transcription start
Csa3G852590.1	TATA-box	TATATA	707	6	+	Arabidopsis thaliana	core promoter element around -30 of transcription start
Csa3G852590.1	TATA-box	ATATAA	708	6	+	Brassica oleracea	core promoter element around -30 of transcription start
Csa3G852590.1	TATA-box	TATA	709	4	+	Arabidopsis thaliana	core promoter element around -30 of transcription start
Csa3G852590.1	TATA-box	TATA	730	4	+	Arabidopsis thaliana	core promoter element around -30 of transcription start
Csa3G852590.1	TATA-box	TATA	762	4	+	Arabidopsis thaliana	core promoter element around -30 of transcription start
Csa3G852590.1	TATA-box	ATATAT	789	6	+	Brassica napus	core promoter element around -30 of transcription start
Csa3G852590.1	TATA-box	TATA	790	4	+	Arabidopsis thaliana	core promoter element around -30 of transcription start
Csa3G852590.1	TATA-box	ATATAA	815	6	+	Brassica oleracea	core promoter element around -30 of transcription start
Csa3G852590.1	TATA-box	TATA	816	4	+	Arabidopsis thaliana	core promoter element around -30 of transcription start
Csa3G852590.1	TATA-box	TATAAAA	883	7	-	Pisum sativum	core promoter element around -30 of transcription start
Csa3G852590.1	TATA-box	TATAAA	884	6	-	Helianthus annuus	core promoter element around -30 of transcription start
Csa3G852590.1	TATA-box	TATAA	885	5	-	Arabidopsis thaliana	core promoter element around -30 of transcription start
Csa3G852590.1	TATA-box	TATA	886	4	+	Arabidopsis thaliana	core promoter element around -30 of transcription start
Csa3G852590.1	TATA-box	TACAAAA	948	7	+	Oryza sativa	core promoter element around -30 of transcription start
Csa3G852590.1	TATA-box	ATATAA	967	6	+	Brassica oleracea	core promoter element around -30 of transcription start
Csa3G852590.1	TATA-box	TATA	968	4	+	Arabidopsis thaliana	core promoter element around -30 of transcription start
Csa3G852590.1	TATA-box	ATATAA	1001	6	+	Brassica oleracea	core promoter element around -30 of transcription start
Csa3G852590.1	TATA-box	TATA	1002	4	-	Arabidopsis thaliana	core promoter element around -30 of transcription start
Csa3G852590.1	TATA-box	TATAAGAA	1408	8	-	Zea mays	core promoter element around -30 of transcription start
Csa3G852590.1	TATA-box	TATAA	1411	5	-	Arabidopsis thaliana	core promoter element around -30 of transcription start
Csa3G852590.1	TATA-box	TATA	1412	4	-	Arabidopsis thaliana	core promoter element around -30 of transcription start
Csa3G852590.1	TATA-box	TACAAAA	1423	7	+	Oryza sativa	core promoter element around -30 of transcription start
Csa3G852590.1	TATA-box	TATAAA	1496	6	-	Helianthus annuus	core promoter element around -30 of transcription start
Csa3G852590.1	TATA-box	TATAA	1497	5	-	Arabidopsis thaliana	core promoter element around -30 of transcription start
Csa3G852590.1	TATA-box	TATA	1498	4	-	Arabidopsis thaliana	core promoter element around -30 of transcription start
Csa3G852590.1	TATA-box	TACAAAA	1511	7	-	Oryza sativa	core promoter element around -30 of transcription start
Csa3G852590.1	TATA-box	TATA	1731	4	-	Arabidopsis thaliana	core promoter element around -30 of transcription start
Csa3G852590.1	TATA-box	TACAAAA	1763	7	+	Oryza sativa	core promoter element around -30 of transcription start
Csa3G852590.1	TATA-box	TATAAAT	1769	7	-	Brassica juncea	core promoter element around -30 of transcription start
Csa3G852590.1	TATA-box	TATAAA	1770	6	-	Helianthus annuus	core promoter element around -30 of transcription start
Csa3G852590.1	TATA-box	TATAA	1771	5	-	Arabidopsis thaliana	core promoter element around -30 of transcription start
Csa3G852590.1	TATA-box	TATA	1772	4	-	Arabidopsis thaliana	core promoter element around -30 of transcription start
Csa3G852590.1	TATA-box	TATAAA	1779	6	-	Helianthus annuus	core promoter element around -30 of transcription start
Csa3G852590.1	TATA-box	TATAA	1780	5	-	Arabidopsis thaliana	core promoter element around -30 of transcription start
Csa3G852590.1	TATA-box	TATA	1781	4	-	Arabidopsis thaliana	core promoter element around -30 of transcription start
Csa3G852590.1	TATA-box	TATAAAA	1984	7	-	Pisum sativum	core promoter element around -30 of transcription start
Csa3G852590.1	TATA-box	TATAAA	1985	6	-	Helianthus annuus	core promoter element around -30 of transcription start
Csa3G852590.1	TATA-box	TATAA	1986	5	-	Arabidopsis thaliana	core promoter element around -30 of transcription start
Csa3G852590.1	TATA-box	TATA	1987	4	-	Arabidopsis thaliana	core promoter element around -30 of transcription start
Csa3G852600.1	TATC-box	TATCCCA	1419	7	-	Oryza sativa	cis-acting element involved in gibberellin-responsiveness
Csa3G852600.1	G-Box	CACGTG	460	6	+	Pisum sativum	cis-acting regulatory element involved in light responsiveness
Csa3G852600.1	G-Box	CACGTT	1392	6	+	Pisum sativum	cis-acting regulatory element involved in light responsiveness
Csa3G852600.1	MBS	CAACTG	272	6	-	Arabidopsis thaliana	MYB binding site involved in drought-inducibility
Csa3G852600.1	MBS	CAACTG	612	6	-	Arabidopsis thaliana	MYB binding site involved in drought-inducibility
Csa3G852600.1	MBS	CAACTG	1248	6	-	Arabidopsis thaliana	MYB binding site involved in drought-inducibility
Csa3G852600.1	AC-I	GCTTACCTACCA	1262	11	-	Arabidopsis thaliana
Csa3G852600.1	AC-I	(T/C)C(T/C)(C/T)ACC(T/C)ACC	1263	8.5	-	Phaseolus vulgaris
Csa3G852600.1	TGACG-motif	TGACG	84	5	-	Hordeum vulgare	cis-acting regulatory element involved in the MeJA-responsiveness
Csa3G852600.1	TGACG-motif	TGACG	288	5	+	Hordeum vulgare	cis-acting regulatory element involved in the MeJA-responsiveness
Csa3G852600.1	TGACG-motif	TGACG	511	5	+	Hordeum vulgare	cis-acting regulatory element involved in the MeJA-responsiveness
Csa3G852600.1	CGTCA-motif	CGTCA	84	5	+	Hordeum vulgare	cis-acting regulatory element involved in the MeJA-responsiveness
Csa3G852600.1	CGTCA-motif	CGTCA	288	5	-	Hordeum vulgare	cis-acting regulatory element involved in the MeJA-responsiveness
Csa3G852600.1	CGTCA-motif	CGTCA	511	5	-	Hordeum vulgare	cis-acting regulatory element involved in the MeJA-responsiveness
Csa3G852600.1	as-1	TGACG	84	5	-	Arabidopsis thaliana
Csa3G852600.1	as-1	TGACG	288	5	+	Arabidopsis thaliana
Csa3G852600.1	as-1	TGACG	511	5	+	Arabidopsis thaliana
Csa3G852600.1	ARE	AAACCA	200	6	+	Zea mays	cis-acting regulatory element essential for the anaerobic induction
Csa3G852600.1	ARE	AAACCA	440	6	+	Zea mays	cis-acting regulatory element essential for the anaerobic induction
Csa3G852600.1	ARE	AAACCA	801	6	+	Zea mays	cis-acting regulatory element essential for the anaerobic induction
Csa3G852600.1	ARE	AAACCA	1031	6	+	Zea mays	cis-acting regulatory element essential for the anaerobic induction
Csa3G852600.1	ARE	AAACCA	1178	6	-	Zea mays	cis-acting regulatory element essential for the anaerobic induction
Csa3G852600.1	ATC-motif	AGTAATCT	594	8	+	Spinacia oleracea	part of a conserved DNA module involved in light responsiveness
Csa3G852600.1	Myc	TCTCTTA	166	7	-	Arabidopsis thaliana
Csa3G852600.1	G-box	CACGTC	289	6	-	Zea mays	cis-acting regulatory element involved in light responsiveness
Csa3G852600.1	G-box	CACGTG	460	6	+	Arabidopsis thaliana	cis-acting regulatory element involved in light responsiveness
Csa3G852600.1	Myb-binding site	CAACAG	1254	6	-	Nicotiana tabacum
Csa3G852600.1	CAAT-box	CAAT	10	4	+	Nicotiana glutinosa
Csa3G852600.1	CAAT-box	CAAAT	70	5	-	Pisum sativum	common cis-acting element in promoter and enhancer regions
Csa3G852600.1	CAAT-box	TGCCAAC	101	7	+	Petunia hybrida	common cis-acting element in promoter and enhancer regions
Csa3G852600.1	CAAT-box	CAAT	122	4	+	Nicotiana glutinosa
Csa3G852600.1	CAAT-box	CAAAT	208	5	+	Pisum sativum	common cis-acting element in promoter and enhancer regions
Csa3G852600.1	CAAT-box	CAAAT	284	5	+	Pisum sativum	common cis-acting element in promoter and enhancer regions
Csa3G852600.1	CAAT-box	CCAAT	319	5	+	Arabidopsis thaliana	common cis-acting element in promoter and enhancer regions
Csa3G852600.1	CAAT-box	CAAT	320	4	+	Nicotiana glutinosa
Csa3G852600.1	CAAT-box	CAAT	328	4	-	Nicotiana glutinosa
Csa3G852600.1	CAAT-box	CAAT	556	4	+	Nicotiana glutinosa
Csa3G852600.1	CAAT-box	CAAAT	569	5	-	Pisum sativum	common cis-acting element in promoter and enhancer regions
Csa3G852600.1	CAAT-box	CAAT	630	4	+	Nicotiana glutinosa
Csa3G852600.1	CAAT-box	CAAAT	650	5	+	Pisum sativum	common cis-acting element in promoter and enhancer regions
Csa3G852600.1	CAAT-box	CAAAT	664	5	+	Pisum sativum	common cis-acting element in promoter and enhancer regions
Csa3G852600.1	CAAT-box	CAAT	712	4	+	Nicotiana glutinosa
Csa3G852600.1	CAAT-box	CAAAT	736	5	+	Pisum sativum	common cis-acting element in promoter and enhancer regions
Csa3G852600.1	CAAT-box	CAAT	767	4	-	Nicotiana glutinosa
Csa3G852600.1	CAAT-box	CAAT	882	4	+	Nicotiana glutinosa
Csa3G852600.1	CAAT-box	CAAT	906	4	+	Nicotiana glutinosa
Csa3G852600.1	CAAT-box	CAAAT	908	5	-	Pisum sativum	common cis-acting element in promoter and enhancer regions
Csa3G852600.1	CAAT-box	CCAAT	936	5	+	Arabidopsis thaliana	common cis-acting element in promoter and enhancer regions
Csa3G852600.1	CAAT-box	CAAT	937	4	+	Nicotiana glutinosa
Csa3G852600.1	CAAT-box	CAAT	1016	4	+	Nicotiana glutinosa
Csa3G852600.1	CAAT-box	CAAAT	1167	5	-	Pisum sativum	common cis-acting element in promoter and enhancer regions
Csa3G852600.1	CAAT-box	CAAT	1191	4	+	Nicotiana glutinosa
Csa3G852600.1	CAAT-box	CAAT	1214	4	-	Nicotiana glutinosa
Csa3G852600.1	CAAT-box	CCAAT	1218	5	-	Arabidopsis thaliana	common cis-acting element in promoter and enhancer regions
Csa3G852600.1	CAAT-box	CCAAT	1260	5	-	Arabidopsis thaliana	common cis-acting element in promoter and enhancer regions
Csa3G852600.1	CAAT-box	CAAT	1360	4	+	Nicotiana glutinosa
Csa3G852600.1	CAAT-box	CAAT	1411	4	-	Nicotiana glutinosa
Csa3G852600.1	CAAT-box	CAAT	1441	4	+	Nicotiana glutinosa
Csa3G852600.1	CAAT-box	CAAAT	1478	5	+	Pisum sativum	common cis-acting element in promoter and enhancer regions
Csa3G852600.1	CAAT-box	CAAT	1522	4	+	Nicotiana glutinosa
Csa3G852600.1	CAAT-box	CAAT	1570	4	+	Nicotiana glutinosa
Csa3G852600.1	CAAT-box	CAAT	1638	4	+	Nicotiana glutinosa
Csa3G852600.1	CAAT-box	CAAT	1640	4	-	Nicotiana glutinosa
Csa3G852600.1	CAAT-box	CAAT	1737	4	+	Nicotiana glutinosa
Csa3G852600.1	CAAT-box	CAAT	1749	4	+	Nicotiana glutinosa
Csa3G852600.1	CAAT-box	CAAT	1751	4	-	Nicotiana glutinosa
Csa3G852600.1	CAAT-box	CAAAT	1855	5	+	Pisum sativum	common cis-acting element in promoter and enhancer regions
Csa3G852600.1	CAAT-box	CAAT	1940	4	+	Nicotiana glutinosa
Csa3G852600.1	CAAT-box	CAACCAACTCC	1958	10	+	Arabidopsis thaliana	common cis-acting element in promoter and enhancer regions
Csa3G852600.1	CAAT-box	CAAAT	1962	5	+	Pisum sativum	common cis-acting element in promoter and enhancer regions
Csa3G852600.1	CAAT-box	CAAAT	1979	5	+	Pisum sativum	common cis-acting element in promoter and enhancer regions
Csa3G852600.1	Box 4	ATTAAT	793	6	+	Petroselinum crispum	part of a conserved DNA module involved in light responsiveness
Csa3G852600.1	Box 4	ATTAAT	1982	6	-	Petroselinum crispum	part of a conserved DNA module involved in light responsiveness
Csa3G852600.1	MYB	CAACCA	73	6	-	Arabidopsis thaliana
Csa3G852600.1	MYB	CAACCA	204	6	+	Arabidopsis thaliana
Csa3G852600.1	MYB	CAACCA	218	6	+	Arabidopsis thaliana
Csa3G852600.1	MYB	CAACAG	1254	6	-	Arabidopsis thaliana
Csa3G852600.1	MYB	TAACCA	1388	6	+	Arabidopsis thaliana
Csa3G852600.1	MYB	CAACCA	1958	6	+	Arabidopsis thaliana
Csa3G852600.1	AT~TATA-box	TATATA	818	6	+	Arabidopsis thaliana
Csa3G852600.1	AT~TATA-box	TATATA	820	6	+	Arabidopsis thaliana
Csa3G852600.1	AT~TATA-box	TATATA	822	6	+	Arabidopsis thaliana
Csa3G852600.1	AT~TATA-box	TATATA	824	6	+	Arabidopsis thaliana
Csa3G852600.1	AT~TATA-box	TATATA	826	6	+	Arabidopsis thaliana
Csa3G852600.1	AT~TATA-box	TATATA	978	6	+	Arabidopsis thaliana
Csa3G852600.1	AT~TATA-box	TATATA	1868	6	-	Arabidopsis thaliana
Csa3G852600.1	ERE	ATTTTAAA	1463	8	-	Nicotiana glutinos
Csa3G852600.1	GT1-motif	GGTTAAT	884	7	-	Avena sativa	light responsive element
Csa3G852600.1	GT1-motif	GGTTAA	885	6	-	Arabidopsis thaliana	light responsive element
Csa3G852600.1	ACE	CTAACGTATT	964	10	+	Petroselinum crispum	cis-acting element involved in light responsiveness
Csa3G852600.1	STRE	AGGGG	427	5	-	Arabidopsis thaliana
Csa3G852600.1	STRE	AGGGG	681	5	+	Arabidopsis thaliana
Csa3G852600.1	GA-motif	ATAGATAA	467	8	+	Arabidopsis thaliana	part of a light responsive element
Csa3G852600.1	GA-motif	ATAGATAA	981	8	+	Arabidopsis thaliana	part of a light responsive element
Csa3G852600.1	TCA-element	CCATCTTTTT	1195	9	-	Nicotiana tabacum	cis-acting element involved in salicylic acid responsiveness
Csa3G852600.1	MYC	CATTTG	69	6	+	Arabidopsis thaliana
Csa3G852600.1	MYC	CATGTG	159	6	+	Arabidopsis thaliana
Csa3G852600.1	MYC	CATTTG	284	6	-	Arabidopsis thaliana
Csa3G852600.1	MYC	CATTTG	650	6	-	Arabidopsis thaliana
Csa3G852600.1	MYC	CATTTG	664	6	-	Arabidopsis thaliana
Csa3G852600.1	MYC	CAATTG	1638	6	-	Arabidopsis thaliana
Csa3G852600.1	MYC	CAATTG	1749	6	-	Arabidopsis thaliana
Csa3G852600.1	MYC	CATGTG	1797	6	-	Arabidopsis thaliana
Csa3G852600.1	WRE3	CCACCT	311	6	-	Pisum sativum
Csa3G852600.1	ABRE	ACGTG	290	5	+	Arabidopsis thaliana	cis-acting element involved in the abscisic acid responsiveness
Csa3G852600.1	ABRE	CACGTG	460	6	+	Arabidopsis thaliana	cis-acting element involved in the abscisic acid responsiveness
Csa3G852600.1	ABRE	ACGTG	461	5	+	Arabidopsis thaliana	cis-acting element involved in the abscisic acid responsiveness
Csa3G852600.1	ABRE	ACGTG	1392	5	-	Arabidopsis thaliana	cis-acting element involved in the abscisic acid responsiveness
Csa3G852600.1	TCT-motif	TCTTAC	165	6	-	Arabidopsis thaliana	part of a light responsive element
Csa3G852600.1	Unnamed__4	CTCC	258	4	+	Petroselinum hortense
Csa3G852600.1	Unnamed__4	CTCC	309	4	-	Petroselinum hortense
Csa3G852600.1	Unnamed__4	CTCC	376	4	+	Petroselinum hortense
Csa3G852600.1	Unnamed__4	CTCC	384	4	-	Petroselinum hortense
Csa3G852600.1	Unnamed__4	CTCC	425	4	+	Petroselinum hortense
Csa3G852600.1	Unnamed__4	CTCC	435	4	+	Petroselinum hortense
Csa3G852600.1	Unnamed__4	CTCC	457	4	+	Petroselinum hortense
Csa3G852600.1	Unnamed__4	CTCC	481	4	-	Petroselinum hortense
Csa3G852600.1	Unnamed__4	CTCC	506	4	-	Petroselinum hortense
Csa3G852600.1	Unnamed__4	CTCC	619	4	-	Petroselinum hortense
Csa3G852600.1	Unnamed__4	CTCC	1111	4	-	Petroselinum hortense
Csa3G852600.1	Unnamed__4	CTCC	1591	4	+	Petroselinum hortense
Csa3G852600.1	Unnamed__4	CTCC	1686	4	-	Petroselinum hortense
Csa3G852600.1	Unnamed__4	CTCC	1852	4	+	Petroselinum hortense
Csa3G852600.1	AT-rich element	ATAGAAATCAA	1511	10	-	Glycine max	binding site of AT-rich DNA binding protein (ATBP-1)
Csa3G852600.1	TATA-box	ATTATA	749	6	+	Brassica napus	core promoter element around -30 of transcription start
Csa3G852600.1	TATA-box	TATAA	750	5	-	Arabidopsis thaliana	core promoter element around -30 of transcription start
Csa3G852600.1	TATA-box	TATA	751	4	+	Arabidopsis thaliana	core promoter element around -30 of transcription start
Csa3G852600.1	TATA-box	ATATAT	817	6	+	Brassica napus	core promoter element around -30 of transcription start
Csa3G852600.1	TATA-box	TATATA	818	6	+	Arabidopsis thaliana	core promoter element around -30 of transcription start
Csa3G852600.1	TATA-box	ATATAT	819	6	+	Brassica napus	core promoter element around -30 of transcription start
Csa3G852600.1	TATA-box	TATATA	820	6	+	Arabidopsis thaliana	core promoter element around -30 of transcription start
Csa3G852600.1	TATA-box	ATATAT	821	6	+	Brassica napus	core promoter element around -30 of transcription start
Csa3G852600.1	TATA-box	TATATA	822	6	+	Arabidopsis thaliana	core promoter element around -30 of transcription start
Csa3G852600.1	TATA-box	ATATAT	823	6	+	Brassica napus	core promoter element around -30 of transcription start
Csa3G852600.1	TATA-box	TATATA	824	6	+	Arabidopsis thaliana	core promoter element around -30 of transcription start
Csa3G852600.1	TATA-box	ATATAT	825	6	+	Brassica napus	core promoter element around -30 of transcription start
Csa3G852600.1	TATA-box	TATATA	826	6	+	Arabidopsis thaliana	core promoter element around -30 of transcription start
Csa3G852600.1	TATA-box	ATATAT	827	6	+	Brassica napus	core promoter element around -30 of transcription start
Csa3G852600.1	TATA-box	TATA	828	4	+	Arabidopsis thaliana	core promoter element around -30 of transcription start
Csa3G852600.1	TATA-box	ATTATA	842	6	+	Brassica napus	core promoter element around -30 of transcription start
Csa3G852600.1	TATA-box	TATAA	843	5	-	Arabidopsis thaliana	core promoter element around -30 of transcription start
Csa3G852600.1	TATA-box	TATA	844	4	+	Arabidopsis thaliana	core promoter element around -30 of transcription start
Csa3G852600.1	TATA-box	ATATAT	977	6	+	Brassica napus	core promoter element around -30 of transcription start
Csa3G852600.1	TATA-box	TATATA	978	6	+	Arabidopsis thaliana	core promoter element around -30 of transcription start
Csa3G852600.1	TATA-box	TATA	980	4	+	Arabidopsis thaliana	core promoter element around -30 of transcription start
Csa3G852600.1	TATA-box	ATATAA	1007	6	+	Brassica oleracea	core promoter element around -30 of transcription start
Csa3G852600.1	TATA-box	TATA	1008	4	-	Arabidopsis thaliana	core promoter element around -30 of transcription start
Csa3G852600.1	TATA-box	ATTATA	1051	6	+	Brassica napus	core promoter element around -30 of transcription start
Csa3G852600.1	TATA-box	TATAA	1052	5	-	Arabidopsis thaliana	core promoter element around -30 of transcription start
Csa3G852600.1	TATA-box	TATA	1053	4	-	Arabidopsis thaliana	core promoter element around -30 of transcription start
Csa3G852600.1	TATA-box	TACAAAA	1063	7	+	Oryza sativa	core promoter element around -30 of transcription start
Csa3G852600.1	TATA-box	ccTATAAAaa	1098	9	-	Arabidopsis thaliana	core promoter element around -30 of transcription start
Csa3G852600.1	TATA-box	TATTTAAA	1397	8	+	Arabidopsis thaliana	core promoter element around -30 of transcription start
Csa3G852600.1	TATA-box	TATTTAAA	1399	8	-	Arabidopsis thaliana	core promoter element around -30 of transcription start
Csa3G852600.1	TATA-box	ATATAT	1423	6	-	Brassica napus	core promoter element around -30 of transcription start
Csa3G852600.1	TATA-box	TATA	1424	4	-	Arabidopsis thaliana	core promoter element around -30 of transcription start
Csa3G852600.1	TATA-box	ccTATAAAaa	1446	9	-	Arabidopsis thaliana	core promoter element around -30 of transcription start
Csa3G852600.1	TATA-box	TATAA	1498	5	-	Arabidopsis thaliana	core promoter element around -30 of transcription start
Csa3G852600.1	TATA-box	TATA	1499	4	-	Arabidopsis thaliana	core promoter element around -30 of transcription start
Csa3G852600.1	TATA-box	TATA	1541	4	-	Arabidopsis thaliana	core promoter element around -30 of transcription start
Csa3G852600.1	TATA-box	ccTATAAAaa	1555	9	-	Arabidopsis thaliana	core promoter element around -30 of transcription start
Csa3G852600.1	TATA-box	ATTATA	1557	6	+	Brassica napus	core promoter element around -30 of transcription start
Csa3G852600.1	TATA-box	TATAA	1558	5	-	Arabidopsis thaliana	core promoter element around -30 of transcription start
Csa3G852600.1	TATA-box	TATA	1559	4	-	Arabidopsis thaliana	core promoter element around -30 of transcription start
Csa3G852600.1	TATA-box	TACAAAA	1579	7	-	Oryza sativa	core promoter element around -30 of transcription start
Csa3G852600.1	TATA-box	TATAA	1833	5	-	Arabidopsis thaliana	core promoter element around -30 of transcription start
Csa3G852600.1	TATA-box	TATA	1834	4	-	Arabidopsis thaliana	core promoter element around -30 of transcription start
Csa3G852600.1	TATA-box	ATTATA	1858	6	+	Brassica napus	core promoter element around -30 of transcription start
Csa3G852600.1	TATA-box	TATAA	1859	5	-	Arabidopsis thaliana	core promoter element around -30 of transcription start
Csa3G852600.1	TATA-box	TATA	1860	4	-	Arabidopsis thaliana	core promoter element around -30 of transcription start
Csa3G852600.1	TATA-box	ATATAT	1867	6	-	Brassica napus	core promoter element around -30 of transcription start
Csa3G852600.1	TATA-box	TATATA	1868	6	-	Arabidopsis thaliana	core promoter element around -30 of transcription start
Csa3G852600.1	TATA-box	ATATAT	1869	6	-	Brassica napus	core promoter element around -30 of transcription start
Csa3G852600.1	TATA-box	TATA	1870	4	-	Arabidopsis thaliana	core promoter element around -30 of transcription start
Csa3G852600.1	TATA-box	ccTATAAAaa	1922	10	+	Arabidopsis thaliana	core promoter element around -30 of transcription start
Csa3G852600.1	TATA-box	TATA	1924	4	-	Arabidopsis thaliana	core promoter element around -30 of transcription start
Csa3G852600.1	Myb	CAACTG	272	6	-	Arabidopsis thaliana
Csa3G852600.1	Myb	CAACTG	612	6	-	Arabidopsis thaliana
Csa3G852600.1	Myb	CAACTG	1248	6	-	Arabidopsis thaliana
Csa3G852600.1	AAGAA-motif	GAAAGAA	778	7	-	Avena sativa
Csa3G852600.1	MYB-like sequence	TAACCA	1388	6	+	Arabidopsis thaliana
Csa3G852600.1	AE-box	AGAAACAA	625	8	+	Arabidopsis thaliana	part of a module for light response
Csa3G852600.1	AE-box	AGAAACTT	727	8	+	Arabidopsis thaliana	part of a module for light response
Csa3G852600.1	chs-CMA1a	TTACTTAA	1367	8	+	Daucus carota	part of a light responsive element
Csa3G852600.1	TCCC-motif	TCTCCCT	382	7	-	Spinacia oleracea	part of a light responsive element
Csa3G852600.1	TCCC-motif	TCTCCCT	1590	7	+	Spinacia oleracea	part of a light responsive element
Csa3G852600.1	Unnamed__1	CGTGG	459	5	-	Zea mays
Csa3G852600.1	Unnamed__1	CGTGG	804	5	-	Zea mays
Csa3G852600.1	Unnamed__1	CGTGG	1287	5	+	Zea mays
Csa3G852600.1	Unnamed__1	CGTGG	1391	5	-	Zea mays
Csa3G852600.1	Unnamed__1	CGTGG	1417	5	+	Zea mays
Csa3G852610.1	MBS	CAACTG	493	6	-	Arabidopsis thaliana	MYB binding site involved in drought-inducibility
Csa3G852610.1	as-1	TGACG	219	5	+	Arabidopsis thaliana
Csa3G852610.1	as-1	TGACG	434	5	-	Arabidopsis thaliana
Csa3G852610.1	as-1	TGACG	561	5	+	Arabidopsis thaliana
Csa3G852610.1	as-1	TGACG	929	5	+	Arabidopsis thaliana
Csa3G852610.1	CGTCA-motif	CGTCA	219	5	-	Hordeum vulgare	cis-acting regulatory element involved in the MeJA-responsiveness
Csa3G852610.1	CGTCA-motif	CGTCA	434	5	+	Hordeum vulgare	cis-acting regulatory element involved in the MeJA-responsiveness
Csa3G852610.1	CGTCA-motif	CGTCA	561	5	-	Hordeum vulgare	cis-acting regulatory element involved in the MeJA-responsiveness
Csa3G852610.1	CGTCA-motif	CGTCA	929	5	-	Hordeum vulgare	cis-acting regulatory element involved in the MeJA-responsiveness
Csa3G852610.1	TGACG-motif	TGACG	219	5	+	Hordeum vulgare	cis-acting regulatory element involved in the MeJA-responsiveness
Csa3G852610.1	TGACG-motif	TGACG	434	5	-	Hordeum vulgare	cis-acting regulatory element involved in the MeJA-responsiveness
Csa3G852610.1	TGACG-motif	TGACG	561	5	+	Hordeum vulgare	cis-acting regulatory element involved in the MeJA-responsiveness
Csa3G852610.1	TGACG-motif	TGACG	929	5	+	Hordeum vulgare	cis-acting regulatory element involved in the MeJA-responsiveness
Csa3G852610.1	TATA	TATAAAAT	354	8	-	Arabidopsis thaliana
Csa3G852610.1	Myc	TCTCTTA	1945	7	-	Arabidopsis thaliana
Csa3G852610.1	MRE	AACCTAA	1800	7	+	Petroselinum crispum	MYB binding site involved in light responsiveness
Csa3G852610.1	G-box	CACGAC	154	6	+	Zea mays	cis-acting regulatory element involved in light responsiveness
Csa3G852610.1	MYB	CAACCA	437	6	+	Arabidopsis thaliana
Csa3G852610.1	MYB	CAACCA	1603	6	+	Arabidopsis thaliana
Csa3G852610.1	Box 4	ATTAAT	660	6	+	Petroselinum crispum	part of a conserved DNA module involved in light responsiveness
Csa3G852610.1	CAAT-box	CAAT	19	4	-	Nicotiana glutinosa
Csa3G852610.1	CAAT-box	CCAAT	121	5	+	Arabidopsis thaliana	common cis-acting element in promoter and enhancer regions
Csa3G852610.1	CAAT-box	CAAT	122	4	+	Nicotiana glutinosa
Csa3G852610.1	CAAT-box	CCAAT	134	5	-	Arabidopsis thaliana	common cis-acting element in promoter and enhancer regions
Csa3G852610.1	CAAT-box	CAAAT	316	5	-	Pisum sativum	common cis-acting element in promoter and enhancer regions
Csa3G852610.1	CAAT-box	CAAAT	371	5	+	Pisum sativum	common cis-acting element in promoter and enhancer regions
Csa3G852610.1	CAAT-box	CAAAT	386	5	-	Pisum sativum	common cis-acting element in promoter and enhancer regions
Csa3G852610.1	CAAT-box	CAAAT	403	5	-	Pisum sativum	common cis-acting element in promoter and enhancer regions
Csa3G852610.1	CAAT-box	CAAAT	446	5	+	Pisum sativum	common cis-acting element in promoter and enhancer regions
Csa3G852610.1	CAAT-box	CAAAT	457	5	+	Pisum sativum	common cis-acting element in promoter and enhancer regions
Csa3G852610.1	CAAT-box	CAAT	531	4	-	Nicotiana glutinosa
Csa3G852610.1	CAAT-box	CAAAT	608	5	-	Pisum sativum	common cis-acting element in promoter and enhancer regions
Csa3G852610.1	CAAT-box	CAAAT	816	5	+	Pisum sativum	common cis-acting element in promoter and enhancer regions
Csa3G852610.1	CAAT-box	CAAT	846	4	-	Nicotiana glutinosa
Csa3G852610.1	CAAT-box	CCAAT	858	5	-	Arabidopsis thaliana	common cis-acting element in promoter and enhancer regions
Csa3G852610.1	CAAT-box	CAAAT	925	5	+	Pisum sativum	common cis-acting element in promoter and enhancer regions
Csa3G852610.1	CAAT-box	CAAAT	992	5	-	Pisum sativum	common cis-acting element in promoter and enhancer regions
Csa3G852610.1	CAAT-box	CAAT	1006	4	+	Nicotiana glutinosa
Csa3G852610.1	CAAT-box	CAAAT	1049	5	-	Pisum sativum	common cis-acting element in promoter and enhancer regions
Csa3G852610.1	CAAT-box	CCAAT	1056	5	-	Arabidopsis thaliana	common cis-acting element in promoter and enhancer regions
Csa3G852610.1	CAAT-box	CAAAT	1245	5	+	Pisum sativum	common cis-acting element in promoter and enhancer regions
Csa3G852610.1	CAAT-box	CAAAT	1275	5	+	Pisum sativum	common cis-acting element in promoter and enhancer regions
Csa3G852610.1	CAAT-box	CAAT	1295	4	-	Nicotiana glutinosa
Csa3G852610.1	CAAT-box	CCCAATTT	1392	8	+	Arabidopsis thaliana	common cis-acting element in promoter and enhancer regions
Csa3G852610.1	CAAT-box	CCAAT	1393	5	+	Arabidopsis thaliana	common cis-acting element in promoter and enhancer regions
Csa3G852610.1	CAAT-box	CAAT	1394	4	+	Nicotiana glutinosa
Csa3G852610.1	CAAT-box	CAAT	1569	4	-	Nicotiana glutinosa
Csa3G852610.1	CAAT-box	CAAT	1648	4	+	Nicotiana glutinosa
Csa3G852610.1	CAAT-box	CAAT	1655	4	-	Nicotiana glutinosa
Csa3G852610.1	CAAT-box	CAAT	1869	4	+	Nicotiana glutinosa
Csa3G852610.1	CAAT-box	CAAAT	1879	5	+	Pisum sativum	common cis-acting element in promoter and enhancer regions
Csa3G852610.1	CAAT-box	CAAT	1933	4	+	Nicotiana glutinosa
Csa3G852610.1	ERE	ATTTTAAA	665	8	-	Nicotiana glutinos
Csa3G852610.1	STRE	AGGGG	1631	5	+	Arabidopsis thaliana
Csa3G852610.1	DRE core	GCCGAC	1572	6	-	Arabidopsis thaliana
Csa3G852610.1	WRE3	CCACCT	128	6	-	Pisum sativum
Csa3G852610.1	MYC	CATGTG	246	6	-	Arabidopsis thaliana
Csa3G852610.1	MYC	CATTTG	446	6	-	Arabidopsis thaliana
Csa3G852610.1	MYC	CATTTG	925	6	-	Arabidopsis thaliana
Csa3G852610.1	MYC	CATTTG	1048	6	+	Arabidopsis thaliana
Csa3G852610.1	MYC	CATGTG	1099	6	+	Arabidopsis thaliana
Csa3G852610.1	O2-site	GTTGACGTGA	431	9	-	Zea mays	cis-acting regulatory element involved in zein metabolism regulation
Csa3G852610.1	circadian	CAAAGATATC	1896	9	+	Lycopersicon esculentum	cis-acting regulatory element involved in circadian control
Csa3G852610.1	Unnamed__6	taTAAATATct	1256	10	-	Zea mays
Csa3G852610.1	Sp1	GGGCGG	788	6	-	Oryza sativa	light responsive element
Csa3G852610.1	Unnamed__4	CTCC	119	4	+	Petroselinum hortense
Csa3G852610.1	Unnamed__4	CTCC	167	4	+	Petroselinum hortense
Csa3G852610.1	Unnamed__4	CTCC	179	4	+	Petroselinum hortense
Csa3G852610.1	Unnamed__4	CTCC	238	4	-	Petroselinum hortense
Csa3G852610.1	Unnamed__4	CTCC	390	4	-	Petroselinum hortense
Csa3G852610.1	Unnamed__4	CTCC	407	4	-	Petroselinum hortense
Csa3G852610.1	Unnamed__4	CTCC	753	4	+	Petroselinum hortense
Csa3G852610.1	Unnamed__4	CTCC	813	4	+	Petroselinum hortense
Csa3G852610.1	Unnamed__4	CTCC	865	4	-	Petroselinum hortense
Csa3G852610.1	Unnamed__4	CTCC	897	4	-	Petroselinum hortense
Csa3G852610.1	Unnamed__4	CTCC	975	4	-	Petroselinum hortense
Csa3G852610.1	Unnamed__4	CTCC	1516	4	+	Petroselinum hortense
Csa3G852610.1	Unnamed__4	CTCC	1737	4	+	Petroselinum hortense
Csa3G852610.1	Unnamed__4	CTCC	1814	4	-	Petroselinum hortense
Csa3G852610.1	Myb	CAACTG	493	6	-	Arabidopsis thaliana
Csa3G852610.1	TATA-box	TATA	275	4	+	Arabidopsis thaliana	core promoter element around -30 of transcription start
Csa3G852610.1	TATA-box	ccTATAAAaa	354	9	-	Arabidopsis thaliana	core promoter element around -30 of transcription start
Csa3G852610.1	TATA-box	TATAAAA	355	7	-	Pisum sativum	core promoter element around -30 of transcription start
Csa3G852610.1	TATA-box	TATAAA	356	6	-	Helianthus annuus	core promoter element around -30 of transcription start
Csa3G852610.1	TATA-box	TATAA	357	5	-	Arabidopsis thaliana	core promoter element around -30 of transcription start
Csa3G852610.1	TATA-box	TATA	358	4	+	Arabidopsis thaliana	core promoter element around -30 of transcription start
Csa3G852610.1	TATA-box	TATAA	616	5	-	Arabidopsis thaliana	core promoter element around -30 of transcription start
Csa3G852610.1	TATA-box	TATA	617	4	+	Arabidopsis thaliana	core promoter element around -30 of transcription start
Csa3G852610.1	TATA-box	TACATAAA	626	8	+	Oryza sativa	core promoter element around -30 of transcription start
Csa3G852610.1	TATA-box	ATATAA	1137	6	+	Brassica oleracea	core promoter element around -30 of transcription start
Csa3G852610.1	TATA-box	TATA	1138	4	-	Arabidopsis thaliana	core promoter element around -30 of transcription start
Csa3G852610.1	TATA-box	ATATAA	1164	6	+	Brassica oleracea	core promoter element around -30 of transcription start
Csa3G852610.1	TATA-box	TATA	1165	4	-	Arabidopsis thaliana	core promoter element around -30 of transcription start
Csa3G852610.1	TATA-box	TATAA	1182	5	-	Arabidopsis thaliana	core promoter element around -30 of transcription start
Csa3G852610.1	TATA-box	TATA	1183	4	-	Arabidopsis thaliana	core promoter element around -30 of transcription start
Csa3G852610.1	TATA-box	TATA	1198	4	-	Arabidopsis thaliana	core promoter element around -30 of transcription start
Csa3G852610.1	TATA-box	ccTATAAAaa	1219	9	-	Arabidopsis thaliana	core promoter element around -30 of transcription start
Csa3G852610.1	TATA-box	TACAAAA	1252	7	+	Oryza sativa	core promoter element around -30 of transcription start
Csa3G852610.1	TATA-box	TATAAATA	1259	8	-	Daucus carota	core promoter element around -30 of transcription start
Csa3G852610.1	TATA-box	TATAAAT	1260	7	-	Brassica juncea	core promoter element around -30 of transcription start
Csa3G852610.1	TATA-box	TATAAA	1261	6	-	Helianthus annuus	core promoter element around -30 of transcription start
Csa3G852610.1	TATA-box	TATAA	1262	5	-	Arabidopsis thaliana	core promoter element around -30 of transcription start
Csa3G852610.1	TATA-box	TATA	1263	4	-	Arabidopsis thaliana	core promoter element around -30 of transcription start
Csa3G852610.1	TATA-box	TATA	1270	4	-	Arabidopsis thaliana	core promoter element around -30 of transcription start
Csa3G852610.1	TATA-box	TATACA	1302	6	-	Helianthus annuus	core promoter element around -30 of transcription start
Csa3G852610.1	TATA-box	TATA	1304	4	-	Arabidopsis thaliana	core promoter element around -30 of transcription start
Csa3G852610.1	TATA-box	TATAA	1346	5	-	Arabidopsis thaliana	core promoter element around -30 of transcription start
Csa3G852610.1	TATA-box	TATA	1347	4	-	Arabidopsis thaliana	core promoter element around -30 of transcription start
Csa3G852610.1	TATA-box	TATTTAAA	1354	8	-	Arabidopsis thaliana	core promoter element around -30 of transcription start
Csa3G852610.1	TATA-box	TATAAAA	1478	7	-	Pisum sativum	core promoter element around -30 of transcription start
Csa3G852610.1	TATA-box	TATAAA	1479	6	-	Helianthus annuus	core promoter element around -30 of transcription start
Csa3G852610.1	TATA-box	TATAA	1480	5	-	Arabidopsis thaliana	core promoter element around -30 of transcription start
Csa3G852610.1	TATA-box	TATA	1481	4	-	Arabidopsis thaliana	core promoter element around -30 of transcription start
Csa3G852610.1	TATA-box	TATA	1622	4	-	Arabidopsis thaliana	core promoter element around -30 of transcription start
Csa3G852610.1	TATA-box	TATACA	1672	6	-	Helianthus annuus	core promoter element around -30 of transcription start
Csa3G852610.1	TATA-box	TATA	1674	4	-	Arabidopsis thaliana	core promoter element around -30 of transcription start
Csa3G852610.1	TATA-box	ccTATAAAaa	1700	9	-	Arabidopsis thaliana	core promoter element around -30 of transcription start
Csa3G852610.1	TATA-box	TATAAAT	1701	7	-	Brassica juncea	core promoter element around -30 of transcription start
Csa3G852610.1	TATA-box	TATAAA	1702	6	-	Helianthus annuus	core promoter element around -30 of transcription start
Csa3G852610.1	TATA-box	TATAA	1703	5	-	Arabidopsis thaliana	core promoter element around -30 of transcription start
Csa3G852610.1	TATA-box	TATA	1704	4	-	Arabidopsis thaliana	core promoter element around -30 of transcription start
Csa3G852610.1	TATA-box	ATTATA	1723	6	+	Brassica napus	core promoter element around -30 of transcription start
Csa3G852610.1	TATA-box	TATAA	1724	5	-	Arabidopsis thaliana	core promoter element around -30 of transcription start
Csa3G852610.1	TATA-box	TATA	1725	4	-	Arabidopsis thaliana	core promoter element around -30 of transcription start
Csa3G852610.1	TATA-box	TATTTAAA	1794	8	+	Arabidopsis thaliana	core promoter element around -30 of transcription start
Csa3G852610.1	TATA-box	ATATAT	1843	6	-	Brassica napus	core promoter element around -30 of transcription start
Csa3G852610.1	TATA-box	TATA	1844	4	-	Arabidopsis thaliana	core promoter element around -30 of transcription start
Csa3G852610.1	TATA-box	TATA	1943	4	-	Arabidopsis thaliana	core promoter element around -30 of transcription start
Csa3G852610.1	GCN4_motif	TGAGTCA	1637	7	+	Oryza sativa	cis-regulatory element involved in endosperm expression
Csa3G852610.1	SARE	TTCGACCATCTT	758	11	+	Nicotiana tabacum	cis-acting element involved in salicylic acid responsiveness
Csa3G852610.1	GATA-motif	GATAGGA	1810	7	+	Arabidopsis thaliana	part of a light responsive element
Csa3G852610.1	TCCC-motif	TCTCCCT	1515	7	+	Spinacia oleracea	part of a light responsive element
Csa3G852620.1	TCT-motif	TCTTAC	562	6	-	Arabidopsis thaliana	part of a light responsive element
Csa3G852620.1	TCT-motif	TCTTAC	577	6	+	Arabidopsis thaliana	part of a light responsive element
Csa3G852620.1	TATA-box	TATACA	49	6	-	Helianthus annuus	core promoter element around -30 of transcription start
Csa3G852620.1	TATA-box	TATA	51	4	+	Arabidopsis thaliana	core promoter element around -30 of transcription start
Csa3G852620.1	TATA-box	TATA	118	4	+	Arabidopsis thaliana	core promoter element around -30 of transcription start
Csa3G852620.1	TATA-box	ATATAA	255	6	+	Brassica oleracea	core promoter element around -30 of transcription start
Csa3G852620.1	TATA-box	TATA	256	4	+	Arabidopsis thaliana	core promoter element around -30 of transcription start
Csa3G852620.1	TATA-box	TATAA	262	5	-	Arabidopsis thaliana	core promoter element around -30 of transcription start
Csa3G852620.1	TATA-box	TATA	263	4	+	Arabidopsis thaliana	core promoter element around -30 of transcription start
Csa3G852620.1	TATA-box	ATATAA	287	6	+	Brassica oleracea	core promoter element around -30 of transcription start
Csa3G852620.1	TATA-box	TATA	288	4	+	Arabidopsis thaliana	core promoter element around -30 of transcription start
Csa3G852620.1	TATA-box	ATATAT	294	6	+	Brassica napus	core promoter element around -30 of transcription start
Csa3G852620.1	TATA-box	TATA	295	4	+	Arabidopsis thaliana	core promoter element around -30 of transcription start
Csa3G852620.1	TATA-box	TATA	704	4	+	Arabidopsis thaliana	core promoter element around -30 of transcription start
Csa3G852620.1	TATA-box	TATAAAT	871	7	-	Brassica juncea	core promoter element around -30 of transcription start
Csa3G852620.1	TATA-box	TATAAA	872	6	-	Helianthus annuus	core promoter element around -30 of transcription start
Csa3G852620.1	TATA-box	TATAA	873	5	-	Arabidopsis thaliana	core promoter element around -30 of transcription start
Csa3G852620.1	TATA-box	TATA	874	4	+	Arabidopsis thaliana	core promoter element around -30 of transcription start
Csa3G852620.1	TATA-box	ATTATA	950	6	+	Brassica napus	core promoter element around -30 of transcription start
Csa3G852620.1	TATA-box	TATAA	951	5	-	Arabidopsis thaliana	core promoter element around -30 of transcription start
Csa3G852620.1	TATA-box	TATA	952	4	+	Arabidopsis thaliana	core promoter element around -30 of transcription start
Csa3G852620.1	TATA-box	ATTATA	1006	6	+	Brassica napus	core promoter element around -30 of transcription start
Csa3G852620.1	TATA-box	TATATAA	1007	7	-	Arabidopsis thaliana	core promoter element around -30 of transcription start
Csa3G852620.1	TATA-box	TATATA	1008	6	-	Arabidopsis thaliana	core promoter element around -30 of transcription start
Csa3G852620.1	TATA-box	ATATAT	1009	6	-	Brassica napus	core promoter element around -30 of transcription start
Csa3G852620.1	TATA-box	TATATA	1010	6	-	Arabidopsis thaliana	core promoter element around -30 of transcription start
Csa3G852620.1	TATA-box	ATATAA	1011	6	+	Brassica oleracea	core promoter element around -30 of transcription start
Csa3G852620.1	TATA-box	TATA	1012	4	-	Arabidopsis thaliana	core promoter element around -30 of transcription start
Csa3G852620.1	TATA-box	ATATAA	1039	6	+	Brassica oleracea	core promoter element around -30 of transcription start
Csa3G852620.1	TATA-box	TATA	1040	4	-	Arabidopsis thaliana	core promoter element around -30 of transcription start
Csa3G852620.1	TATA-box	TATTTAAA	1102	8	+	Arabidopsis thaliana	core promoter element around -30 of transcription start
Csa3G852620.1	TATA-box	TATA	1217	4	-	Arabidopsis thaliana	core promoter element around -30 of transcription start
Csa3G852620.1	TATA-box	TATA	1258	4	-	Arabidopsis thaliana	core promoter element around -30 of transcription start
Csa3G852620.1	TATA-box	TATAAAT	1292	7	-	Brassica juncea	core promoter element around -30 of transcription start
Csa3G852620.1	TATA-box	TATAAA	1293	6	-	Helianthus annuus	core promoter element around -30 of transcription start
Csa3G852620.1	TATA-box	TATAA	1294	5	-	Arabidopsis thaliana	core promoter element around -30 of transcription start
Csa3G852620.1	TATA-box	TATA	1295	4	-	Arabidopsis thaliana	core promoter element around -30 of transcription start
Csa3G852620.1	TATA-box	TATAAATA	1357	8	-	Daucus carota	core promoter element around -30 of transcription start
Csa3G852620.1	TATA-box	TATAAAT	1358	7	-	Brassica juncea	core promoter element around -30 of transcription start
Csa3G852620.1	TATA-box	TATAAA	1359	6	-	Helianthus annuus	core promoter element around -30 of transcription start
Csa3G852620.1	TATA-box	TATAA	1360	5	-	Arabidopsis thaliana	core promoter element around -30 of transcription start
Csa3G852620.1	TATA-box	TATA	1361	4	-	Arabidopsis thaliana	core promoter element around -30 of transcription start
Csa3G852620.1	TATA-box	TATA	1441	4	-	Arabidopsis thaliana	core promoter element around -30 of transcription start
Csa3G852620.1	TATA-box	ccTATAAAaa	1458	9	+	Arabidopsis thaliana	core promoter element around -30 of transcription start
Csa3G852620.1	TATA-box	ATATAT	1833	6	-	Brassica napus	core promoter element around -30 of transcription start
Csa3G852620.1	TATA-box	TATA	1834	4	-	Arabidopsis thaliana	core promoter element around -30 of transcription start
Csa3G852620.1	TATA-box	TACAAAA	1892	7	-	Oryza sativa	core promoter element around -30 of transcription start
Csa3G852620.1	ATCT-motif	AATCTAATCC	25	9	+	Pisum sativum	part of a conserved DNA module involved in light responsiveness
Csa3G852620.1	Myb	CAACTG	1528	6	+	Arabidopsis thaliana
Csa3G852620.1	Unnamed__4	CTCC	271	4	+	Petroselinum hortense
Csa3G852620.1	Unnamed__4	CTCC	777	4	-	Petroselinum hortense
Csa3G852620.1	Unnamed__4	CTCC	884	4	+	Petroselinum hortense
Csa3G852620.1	Unnamed__4	CTCC	1143	4	+	Petroselinum hortense
Csa3G852620.1	Unnamed__4	CTCC	1170	4	+	Petroselinum hortense
Csa3G852620.1	Unnamed__4	CTCC	1193	4	-	Petroselinum hortense
Csa3G852620.1	Unnamed__4	CTCC	1229	4	-	Petroselinum hortense
Csa3G852620.1	Unnamed__4	CTCC	1233	4	-	Petroselinum hortense
Csa3G852620.1	Unnamed__4	CTCC	1481	4	+	Petroselinum hortense
Csa3G852620.1	Unnamed__4	CTCC	1544	4	-	Petroselinum hortense
Csa3G852620.1	Unnamed__4	CTCC	1555	4	+	Petroselinum hortense
Csa3G852620.1	Unnamed__4	CTCC	1751	4	-	Petroselinum hortense
Csa3G852620.1	Unnamed__4	CTCC	1877	4	+	Petroselinum hortense
Csa3G852620.1	Unnamed__4	CTCC	1958	4	+	Petroselinum hortense
Csa3G852620.1	MYB recognition site	CCGTTG	1619	6	+	Arabidopsis thaliana
Csa3G852620.1	RY-element	CATGCATG	1741	8	-	Helianthus annuus	cis-acting regulatory element involved in seed-specific regulation
Csa3G852620.1	MYB-like sequence	TAACCA	987	6	+	Arabidopsis thaliana
Csa3G852620.1	MYB-like sequence	TAACCA	1269	6	+	Arabidopsis thaliana
Csa3G852620.1	MYB-like sequence	TAACCA	1372	6	-	Arabidopsis thaliana
Csa3G852620.1	MYB-like sequence	TAACCA	1489	6	+	Arabidopsis thaliana
Csa3G852620.1	W box	TTGACC	225	6	+	Arabidopsis thaliana
Csa3G852620.1	W box	TTGACC	429	6	-	Arabidopsis thaliana
Csa3G852620.1	Unnamed__1	CGTGG	588	5	+	Zea mays
Csa3G852620.1	Unnamed__1	GAATTTAATTAA	1334	11	-	Glycine max	60K protein binding site
Csa3G852620.1	CAT-box	GCCACT	439	6	-	Arabidopsis thaliana	cis-acting regulatory element related to meristem expression
Csa3G852620.1	as-1	TGACG	380	5	+	Arabidopsis thaliana
Csa3G852620.1	as-1	TGACG	1532	5	+	Arabidopsis thaliana
Csa3G852620.1	CCAAT-box	CAACGG	1619	6	-	Hordeum vulgare	MYBHv1 binding site
Csa3G852620.1	ARE	AAACCA	1503	6	-	Zea mays	cis-acting regulatory element essential for the anaerobic induction
Csa3G852620.1	ARE	AAACCA	1695	6	-	Zea mays	cis-acting regulatory element essential for the anaerobic induction
Csa3G852620.1	TGACG-motif	TGACG	380	5	+	Hordeum vulgare	cis-acting regulatory element involved in the MeJA-responsiveness
Csa3G852620.1	TGACG-motif	TGACG	1532	5	+	Hordeum vulgare	cis-acting regulatory element involved in the MeJA-responsiveness
Csa3G852620.1	CGTCA-motif	CGTCA	380	5	-	Hordeum vulgare	cis-acting regulatory element involved in the MeJA-responsiveness
Csa3G852620.1	CGTCA-motif	CGTCA	1532	5	-	Hordeum vulgare	cis-acting regulatory element involved in the MeJA-responsiveness
Csa3G852620.1	MBS	CAACTG	1528	6	+	Arabidopsis thaliana	MYB binding site involved in drought-inducibility
Csa3G852620.1	G-box	CACGAC	586	6	-	Zea mays	cis-acting regulatory element involved in light responsiveness
Csa3G852620.1	MRE	AACCTAA	914	7	+	Petroselinum crispum	MYB binding site involved in light responsiveness
Csa3G852620.1	AACA_motif	TAACAAACTCCA	1870	11	+	Oryza sativa	involved in endosperm-specific negative expression
Csa3G852620.1	Unnamed__2	AACCTAACCT	189	9	+	Petroselinum hortense
Csa3G852620.1	Unnamed__2	AACCTAACCT	914	9	+	Petroselinum hortense
Csa3G852620.1	GT1-motif	GGTTAAT	840	7	+	Avena sativa	light responsive element
Csa3G852620.1	GT1-motif	GGTTAAT	1267	7	-	Avena sativa	light responsive element
Csa3G852620.1	GT1-motif	GGTTAA	1268	6	-	Arabidopsis thaliana	light responsive element
Csa3G852620.1	GT1-motif	GGTTAAT	1373	7	+	Avena sativa	light responsive element
Csa3G852620.1	ERE	ATTTCATA	1341	8	+	Nicotiana glutinos
Csa3G852620.1	CAAT-box	CAAT	5	4	-	Nicotiana glutinosa
Csa3G852620.1	CAAT-box	CCAAT	33	5	+	Arabidopsis thaliana	common cis-acting element in promoter and enhancer regions
Csa3G852620.1	CAAT-box	CAAT	34	4	+	Nicotiana glutinosa
Csa3G852620.1	CAAT-box	CAAT	55	4	-	Nicotiana glutinosa
Csa3G852620.1	CAAT-box	CAAT	131	4	+	Nicotiana glutinosa
Csa3G852620.1	CAAT-box	CAAT	140	4	+	Nicotiana glutinosa
Csa3G852620.1	CAAT-box	CAAT	160	4	+	Nicotiana glutinosa
Csa3G852620.1	CAAT-box	CAAAT	221	5	+	Pisum sativum	common cis-acting element in promoter and enhancer regions
Csa3G852620.1	CAAT-box	CAAT	224	4	-	Nicotiana glutinosa
Csa3G852620.1	CAAT-box	CAAT	244	4	+	Nicotiana glutinosa
Csa3G852620.1	CAAT-box	CAAAT	432	5	+	Pisum sativum	common cis-acting element in promoter and enhancer regions
Csa3G852620.1	CAAT-box	CAAT	538	4	-	Nicotiana glutinosa
Csa3G852620.1	CAAT-box	CAAT	642	4	-	Nicotiana glutinosa
Csa3G852620.1	CAAT-box	CAAT	664	4	-	Nicotiana glutinosa
Csa3G852620.1	CAAT-box	CCAAT	751	5	+	Arabidopsis thaliana	common cis-acting element in promoter and enhancer regions
Csa3G852620.1	CAAT-box	CAAT	752	4	+	Nicotiana glutinosa
Csa3G852620.1	CAAT-box	CAAAT	812	5	+	Pisum sativum	common cis-acting element in promoter and enhancer regions
Csa3G852620.1	CAAT-box	CAAT	822	4	+	Nicotiana glutinosa
Csa3G852620.1	CAAT-box	CAAT	857	4	+	Nicotiana glutinosa
Csa3G852620.1	CAAT-box	CAAAT	941	5	+	Pisum sativum	common cis-acting element in promoter and enhancer regions
Csa3G852620.1	CAAT-box	CAAAT	970	5	-	Pisum sativum	common cis-acting element in promoter and enhancer regions
Csa3G852620.1	CAAT-box	CAAT	1059	4	+	Nicotiana glutinosa
Csa3G852620.1	CAAT-box	CCAAT	1061	5	-	Arabidopsis thaliana	common cis-acting element in promoter and enhancer regions
Csa3G852620.1	CAAT-box	CAAT	1077	4	+	Nicotiana glutinosa
Csa3G852620.1	CAAT-box	CAAT	1176	4	-	Nicotiana glutinosa
Csa3G852620.1	CAAT-box	CAAT	1188	4	-	Nicotiana glutinosa
Csa3G852620.1	CAAT-box	CAAAT	1205	5	+	Pisum sativum	common cis-acting element in promoter and enhancer regions
Csa3G852620.1	CAAT-box	CAAAT	1213	5	+	Pisum sativum	common cis-acting element in promoter and enhancer regions
Csa3G852620.1	CAAT-box	CAAT	1277	4	-	Nicotiana glutinosa
Csa3G852620.1	CAAT-box	CAAAT	1283	5	-	Pisum sativum	common cis-acting element in promoter and enhancer regions
Csa3G852620.1	CAAT-box	CAAAT	1289	5	+	Pisum sativum	common cis-acting element in promoter and enhancer regions
Csa3G852620.1	CAAT-box	CAAT	1303	4	+	Nicotiana glutinosa
Csa3G852620.1	CAAT-box	CAAAT	1326	5	+	Pisum sativum	common cis-acting element in promoter and enhancer regions
Csa3G852620.1	CAAT-box	CAAT	1396	4	+	Nicotiana glutinosa
Csa3G852620.1	CAAT-box	CAAAT	1398	5	-	Pisum sativum	common cis-acting element in promoter and enhancer regions
Csa3G852620.1	CAAT-box	CCAAT	1458	5	+	Arabidopsis thaliana	common cis-acting element in promoter and enhancer regions
Csa3G852620.1	CAAT-box	CAAT	1459	4	+	Nicotiana glutinosa
Csa3G852620.1	CAAT-box	CAAT	1468	4	+	Nicotiana glutinosa
Csa3G852620.1	CAAT-box	CAAAT	1493	5	+	Pisum sativum	common cis-acting element in promoter and enhancer regions
Csa3G852620.1	CAAT-box	CAAAT	1499	5	+	Pisum sativum	common cis-acting element in promoter and enhancer regions
Csa3G852620.1	CAAT-box	CAAT	1627	4	-	Nicotiana glutinosa
Csa3G852620.1	CAAT-box	CAAT	1657	4	-	Nicotiana glutinosa
Csa3G852620.1	CAAT-box	CAAT	1687	4	-	Nicotiana glutinosa
Csa3G852620.1	CAAT-box	CCAAT	1762	5	-	Arabidopsis thaliana	common cis-acting element in promoter and enhancer regions
Csa3G852620.1	CAAT-box	CCAAT	1781	5	+	Arabidopsis thaliana	common cis-acting element in promoter and enhancer regions
Csa3G852620.1	CAAT-box	CAAT	1782	4	+	Nicotiana glutinosa
Csa3G852620.1	CAAT-box	CAAAT	1805	5	-	Pisum sativum	common cis-acting element in promoter and enhancer regions
Csa3G852620.1	CAAT-box	CAAAT	1823	5	+	Pisum sativum	common cis-acting element in promoter and enhancer regions
Csa3G852620.1	CAAT-box	CAAAT	1830	5	+	Pisum sativum	common cis-acting element in promoter and enhancer regions
Csa3G852620.1	Box 4	ATTAAT	1337	6	-	Petroselinum crispum	part of a conserved DNA module involved in light responsiveness
Csa3G852620.1	AT~TATA-box	TATATA	1008	6	-	Arabidopsis thaliana
Csa3G852620.1	AT~TATA-box	TATATA	1010	6	-	Arabidopsis thaliana
Csa3G852620.1	MYB	TAACCA	987	6	+	Arabidopsis thaliana
Csa3G852620.1	MYB	TAACCA	1269	6	+	Arabidopsis thaliana
Csa3G852620.1	MYB	TAACCA	1372	6	-	Arabidopsis thaliana
Csa3G852620.1	MYB	CAACCA	1455	6	+	Arabidopsis thaliana
Csa3G852620.1	MYB	TAACCA	1489	6	+	Arabidopsis thaliana
Csa3G852620.1	MYB	CAACCA	1791	6	+	Arabidopsis thaliana
Csa3G852620.1	TCA-element	CCATCTTTTT	1861	9	+	Nicotiana tabacum	cis-acting element involved in salicylic acid responsiveness
Csa3G852620.1	MYC	CATTTG	812	6	-	Arabidopsis thaliana
Csa3G852620.1	MYC	CAATTG	1059	6	-	Arabidopsis thaliana
Csa3G852620.1	MYC	CATTTG	1205	6	-	Arabidopsis thaliana
Csa3G852620.1	MYC	CATTTG	1282	6	+	Arabidopsis thaliana
Csa3G852620.1	MYC	CATTTG	1499	6	-	Arabidopsis thaliana
Csa3G852620.1	MYC	CATGTG	1665	6	-	Arabidopsis thaliana
Csa3G852620.1	WUN-motif	AAATTTCCT	1415	9	+	Brassica oleracea	wound-responsive element
Csa3G852620.1	STRE	AGGGG	487	5	+	Arabidopsis thaliana
Csa3G852620.1	STRE	AGGGG	886	5	-	Arabidopsis thaliana
Csa3G852620.1	ACE	CTAACGTATT	192	9	+	Petroselinum crispum	cis-acting element involved in light responsiveness
Csa3G852620.1	DRE core	GCCGAC	405	6	-	Arabidopsis thaliana
Csa3G852630.1	Unnamed__1	CGTGG	892	5	-	Zea mays
Csa3G852630.1	MYB-like sequence	TAACCA	604	6	+	Arabidopsis thaliana
Csa3G852630.1	AAGAA-motif	GAAAGAA	1739	7	+	Avena sativa
Csa3G852630.1	Unnamed__4	CTCC	266	4	-	Petroselinum hortense
Csa3G852630.1	Unnamed__4	CTCC	294	4	-	Petroselinum hortense
Csa3G852630.1	Unnamed__4	CTCC	351	4	-	Petroselinum hortense
Csa3G852630.1	Unnamed__4	CTCC	596	4	+	Petroselinum hortense
Csa3G852630.1	Unnamed__4	CTCC	990	4	+	Petroselinum hortense
Csa3G852630.1	Unnamed__4	CTCC	1596	4	+	Petroselinum hortense
Csa3G852630.1	Unnamed__4	CTCC	1838	4	+	Petroselinum hortense
Csa3G852630.1	Unnamed__4	CTCC	1938	4	+	Petroselinum hortense
Csa3G852630.1	ATCT-motif	AATCTAATCC	931	9	+	Pisum sativum	part of a conserved DNA module involved in light responsiveness
Csa3G852630.1	F-box	CTATTCTCATT	872	10	+	Lycopersicon esculentum
Csa3G852630.1	TATA-box	ATTATA	26	6	+	Brassica napus	core promoter element around -30 of transcription start
Csa3G852630.1	TATA-box	TATAA	27	5	-	Arabidopsis thaliana	core promoter element around -30 of transcription start
Csa3G852630.1	TATA-box	TATA	28	4	+	Arabidopsis thaliana	core promoter element around -30 of transcription start
Csa3G852630.1	TATA-box	ATATAT	116	6	+	Brassica napus	core promoter element around -30 of transcription start
Csa3G852630.1	TATA-box	TATA	117	4	+	Arabidopsis thaliana	core promoter element around -30 of transcription start
Csa3G852630.1	TATA-box	TATACA	150	6	-	Helianthus annuus	core promoter element around -30 of transcription start
Csa3G852630.1	TATA-box	TATA	152	4	+	Arabidopsis thaliana	core promoter element around -30 of transcription start
Csa3G852630.1	TATA-box	ATTATA	227	6	+	Brassica napus	core promoter element around -30 of transcription start
Csa3G852630.1	TATA-box	TATAA	228	5	-	Arabidopsis thaliana	core promoter element around -30 of transcription start
Csa3G852630.1	TATA-box	TATA	229	4	+	Arabidopsis thaliana	core promoter element around -30 of transcription start
Csa3G852630.1	TATA-box	taTATAAAtc	526	9	-	Arabidopsis thaliana	core promoter element around -30 of transcription start
Csa3G852630.1	TATA-box	ATATAA	533	6	+	Brassica oleracea	core promoter element around -30 of transcription start
Csa3G852630.1	TATA-box	TATA	534	4	+	Arabidopsis thaliana	core promoter element around -30 of transcription start
Csa3G852630.1	TATA-box	ATTATA	548	6	+	Brassica napus	core promoter element around -30 of transcription start
Csa3G852630.1	TATA-box	TATAA	549	5	-	Arabidopsis thaliana	core promoter element around -30 of transcription start
Csa3G852630.1	TATA-box	TATA	550	4	+	Arabidopsis thaliana	core promoter element around -30 of transcription start
Csa3G852630.1	TATA-box	ATATAA	667	6	+	Brassica oleracea	core promoter element around -30 of transcription start
Csa3G852630.1	TATA-box	TATA	668	4	+	Arabidopsis thaliana	core promoter element around -30 of transcription start
Csa3G852630.1	TATA-box	TACAAAA	996	7	-	Oryza sativa	core promoter element around -30 of transcription start
Csa3G852630.1	TATA-box	TATACA	999	6	-	Helianthus annuus	core promoter element around -30 of transcription start
Csa3G852630.1	TATA-box	TATA	1001	4	-	Arabidopsis thaliana	core promoter element around -30 of transcription start
Csa3G852630.1	TATA-box	TATAAATA	1003	8	-	Daucus carota	core promoter element around -30 of transcription start
Csa3G852630.1	TATA-box	TATAAAT	1004	7	-	Brassica juncea	core promoter element around -30 of transcription start
Csa3G852630.1	TATA-box	TATAAA	1005	6	-	Helianthus annuus	core promoter element around -30 of transcription start
Csa3G852630.1	TATA-box	TATAA	1006	5	-	Arabidopsis thaliana	core promoter element around -30 of transcription start
Csa3G852630.1	TATA-box	TATA	1007	4	-	Arabidopsis thaliana	core promoter element around -30 of transcription start
Csa3G852630.1	TATA-box	TATAAAT	1097	7	-	Brassica juncea	core promoter element around -30 of transcription start
Csa3G852630.1	TATA-box	TATAAA	1098	6	-	Helianthus annuus	core promoter element around -30 of transcription start
Csa3G852630.1	TATA-box	TATAA	1099	5	-	Arabidopsis thaliana	core promoter element around -30 of transcription start
Csa3G852630.1	TATA-box	TATA	1100	4	-	Arabidopsis thaliana	core promoter element around -30 of transcription start
Csa3G852630.1	TATA-box	TATTTAAA	1179	8	+	Arabidopsis thaliana	core promoter element around -30 of transcription start
Csa3G852630.1	TATA-box	TAAAGATT	1231	8	+	Arabidopsis thaliana	core promoter element around -30 of transcription start
Csa3G852630.1	TATA-box	ATATAA	1244	6	+	Brassica oleracea	core promoter element around -30 of transcription start
Csa3G852630.1	TATA-box	TATA	1245	4	-	Arabidopsis thaliana	core promoter element around -30 of transcription start
Csa3G852630.1	TATA-box	ATATAA	1274	6	+	Brassica oleracea	core promoter element around -30 of transcription start
Csa3G852630.1	TATA-box	TATA	1275	4	-	Arabidopsis thaliana	core promoter element around -30 of transcription start
Csa3G852630.1	TATA-box	TATA	1288	4	-	Arabidopsis thaliana	core promoter element around -30 of transcription start
Csa3G852630.1	TATA-box	ccTATAAAaa	1314	9	+	Arabidopsis thaliana	core promoter element around -30 of transcription start
Csa3G852630.1	TATA-box	TACAAAA	1316	7	+	Oryza sativa	core promoter element around -30 of transcription start
Csa3G852630.1	TATA-box	ATATAT	1356	6	-	Brassica napus	core promoter element around -30 of transcription start
Csa3G852630.1	TATA-box	TATA	1357	4	-	Arabidopsis thaliana	core promoter element around -30 of transcription start
Csa3G852630.1	TATA-box	ATATAT	1444	6	-	Brassica napus	core promoter element around -30 of transcription start
Csa3G852630.1	TATA-box	TATA	1445	4	-	Arabidopsis thaliana	core promoter element around -30 of transcription start
Csa3G852630.1	TATA-box	TATA	1615	4	-	Arabidopsis thaliana	core promoter element around -30 of transcription start
Csa3G852630.1	TATA-box	TACAAAA	1617	7	+	Oryza sativa	core promoter element around -30 of transcription start
Csa3G852630.1	TATA-box	TACAAAA	1699	7	-	Oryza sativa	core promoter element around -30 of transcription start
Csa3G852630.1	TATA-box	ATTATA	1726	6	+	Brassica napus	core promoter element around -30 of transcription start
Csa3G852630.1	TATA-box	TATAA	1727	5	-	Arabidopsis thaliana	core promoter element around -30 of transcription start
Csa3G852630.1	TATA-box	TATA	1728	4	-	Arabidopsis thaliana	core promoter element around -30 of transcription start
Csa3G852630.1	TATA-box	TACAAAA	1816	7	-	Oryza sativa	core promoter element around -30 of transcription start
Csa3G852630.1	TATA-box	ccTATAAAaa	1867	9	+	Arabidopsis thaliana	core promoter element around -30 of transcription start
Csa3G852630.1	TATA-box	ccTATAAAaa	1951	9	+	Arabidopsis thaliana	core promoter element around -30 of transcription start
Csa3G852630.1	AT-rich element	ATAGAAATCAA	2	10	+	Glycine max	binding site of AT-rich DNA binding protein (ATBP-1)
Csa3G852630.1	ABRE	GCCGCGTGGC	891	9	-	Oryza sativa	cis-acting element involved in the abscisic acid responsiveness
Csa3G852630.1	LTR	CCGAAA	752	6	+	Hordeum vulgare	cis-acting element involved in low-temperature responsiveness
Csa3G852630.1	TCT-motif	TCTTAC	984	6	-	Arabidopsis thaliana	part of a light responsive element
Csa3G852630.1	STRE	AGGGG	263	5	+	Arabidopsis thaliana
Csa3G852630.1	STRE	AGGGG	291	5	+	Arabidopsis thaliana
Csa3G852630.1	WUN-motif	CAATTACAT	44	9	-	Nicotiana glutinosa
Csa3G852630.1	WUN-motif	AAATTTCCT	1827	9	+	Brassica oleracea	wound-responsive element
Csa3G852630.1	WRE3	CCACCT	436	6	+	Pisum sativum
Csa3G852630.1	TCA-element	CCATCTTTTT	298	9	-	Nicotiana tabacum	cis-acting element involved in salicylic acid responsiveness
Csa3G852630.1	MYC	CATTTG	185	6	+	Arabidopsis thaliana
Csa3G852630.1	MYC	CATTTG	867	6	-	Arabidopsis thaliana
Csa3G852630.1	MYC	CATTTG	900	6	+	Arabidopsis thaliana
Csa3G852630.1	MYC	CATGTG	1454	6	+	Arabidopsis thaliana
Csa3G852630.1	O2-site	GATGA(C/T)(A/G)TG(A/G)	1432	8	-	Zea mays	cis-acting regulatory element involved in zein metabolism regulation
Csa3G852630.1	Box 4	ATTAAT	696	6	+	Petroselinum crispum	part of a conserved DNA module involved in light responsiveness
Csa3G852630.1	Box 4	ATTAAT	1296	6	-	Petroselinum crispum	part of a conserved DNA module involved in light responsiveness
Csa3G852630.1	Box 4	ATTAAT	1375	6	-	Petroselinum crispum	part of a conserved DNA module involved in light responsiveness
Csa3G852630.1	Box 4	ATTAAT	1607	6	-	Petroselinum crispum	part of a conserved DNA module involved in light responsiveness
Csa3G852630.1	MYB	TAACCA	604	6	+	Arabidopsis thaliana
Csa3G852630.1	MYB	CAACAG	793	6	+	Arabidopsis thaliana
Csa3G852630.1	MYB	CAACCA	904	6	-	Arabidopsis thaliana
Csa3G852630.1	CAAT-box	CAAAT	5	5	+	Pisum sativum	common cis-acting element in promoter and enhancer regions
Csa3G852630.1	CAAT-box	CAAT	49	4	-	Nicotiana glutinosa
Csa3G852630.1	CAAT-box	CAAAT	55	5	+	Pisum sativum	common cis-acting element in promoter and enhancer regions
Csa3G852630.1	CAAT-box	CAAAT	120	5	-	Pisum sativum	common cis-acting element in promoter and enhancer regions
Csa3G852630.1	CAAT-box	CAAAT	186	5	-	Pisum sativum	common cis-acting element in promoter and enhancer regions
Csa3G852630.1	CAAT-box	CAAT	215	4	+	Nicotiana glutinosa
Csa3G852630.1	CAAT-box	CAAAT	247	5	+	Pisum sativum	common cis-acting element in promoter and enhancer regions
Csa3G852630.1	CAAT-box	CAAT	329	4	+	Nicotiana glutinosa
Csa3G852630.1	CAAT-box	CAAAT	431	5	+	Pisum sativum	common cis-acting element in promoter and enhancer regions
Csa3G852630.1	CAAT-box	CAAAT	458	5	+	Pisum sativum	common cis-acting element in promoter and enhancer regions
Csa3G852630.1	CAAT-box	CAAT	472	4	-	Nicotiana glutinosa
Csa3G852630.1	CAAT-box	CAAAT	480	5	-	Pisum sativum	common cis-acting element in promoter and enhancer regions
Csa3G852630.1	CAAT-box	CAAAT	486	5	-	Pisum sativum	common cis-acting element in promoter and enhancer regions
Csa3G852630.1	CAAT-box	CAAT	523	4	-	Nicotiana glutinosa
Csa3G852630.1	CAAT-box	CAAT	615	4	+	Nicotiana glutinosa
Csa3G852630.1	CAAT-box	CAAAT	659	5	-	Pisum sativum	common cis-acting element in promoter and enhancer regions
Csa3G852630.1	CAAT-box	CAAT	764	4	-	Nicotiana glutinosa
Csa3G852630.1	CAAT-box	CAAT	830	4	-	Nicotiana glutinosa
Csa3G852630.1	CAAT-box	CAAAT	867	5	+	Pisum sativum	common cis-acting element in promoter and enhancer regions
Csa3G852630.1	CAAT-box	CAAAT	901	5	-	Pisum sativum	common cis-acting element in promoter and enhancer regions
Csa3G852630.1	CAAT-box	CAAT	947	4	+	Nicotiana glutinosa
Csa3G852630.1	CAAT-box	CCAAT	992	5	+	Arabidopsis thaliana	common cis-acting element in promoter and enhancer regions
Csa3G852630.1	CAAT-box	CAAT	993	4	+	Nicotiana glutinosa
Csa3G852630.1	CAAT-box	CAAAT	1111	5	+	Pisum sativum	common cis-acting element in promoter and enhancer regions
Csa3G852630.1	CAAT-box	CAAT	1222	4	+	Nicotiana glutinosa
Csa3G852630.1	CAAT-box	CAAT	1228	4	+	Nicotiana glutinosa
Csa3G852630.1	CAAT-box	CAAAT	1271	5	+	Pisum sativum	common cis-acting element in promoter and enhancer regions
Csa3G852630.1	CAAT-box	CAAT	1327	4	-	Nicotiana glutinosa
Csa3G852630.1	CAAT-box	CAAT	1354	4	+	Nicotiana glutinosa
Csa3G852630.1	CAAT-box	CCAAT	1441	5	+	Arabidopsis thaliana	common cis-acting element in promoter and enhancer regions
Csa3G852630.1	CAAT-box	CAAT	1442	4	+	Nicotiana glutinosa
Csa3G852630.1	CAAT-box	CAAAT	1471	5	+	Pisum sativum	common cis-acting element in promoter and enhancer regions
Csa3G852630.1	CAAT-box	CAAT	1485	4	-	Nicotiana glutinosa
Csa3G852630.1	CAAT-box	CAAT	1516	4	+	Nicotiana glutinosa
Csa3G852630.1	CAAT-box	CAAT	1529	4	+	Nicotiana glutinosa
Csa3G852630.1	CAAT-box	CCCAATTT	1544	8	+	Arabidopsis thaliana	common cis-acting element in promoter and enhancer regions
Csa3G852630.1	CAAT-box	CCAAT	1545	5	+	Arabidopsis thaliana	common cis-acting element in promoter and enhancer regions
Csa3G852630.1	CAAT-box	CAAT	1546	4	+	Nicotiana glutinosa
Csa3G852630.1	CAAT-box	CAAT	1564	4	-	Nicotiana glutinosa
Csa3G852630.1	CAAT-box	CAAT	1626	4	-	Nicotiana glutinosa
Csa3G852630.1	CAAT-box	CAAT	1677	4	-	Nicotiana glutinosa
Csa3G852630.1	CAAT-box	CAAT	1684	4	+	Nicotiana glutinosa
Csa3G852630.1	CAAT-box	CAAAT	1695	5	+	Pisum sativum	common cis-acting element in promoter and enhancer regions
Csa3G852630.1	CAAT-box	CAAT	1705	4	-	Nicotiana glutinosa
Csa3G852630.1	CAAT-box	CAAAT	1723	5	+	Pisum sativum	common cis-acting element in promoter and enhancer regions
Csa3G852630.1	CAAT-box	CAAT	1765	4	-	Nicotiana glutinosa
Csa3G852630.1	CAAT-box	CAAAT	1775	5	-	Pisum sativum	common cis-acting element in promoter and enhancer regions
Csa3G852630.1	CAAT-box	CAAT	1795	4	+	Nicotiana glutinosa
Csa3G852630.1	CAAT-box	CAAT	1809	4	-	Nicotiana glutinosa
Csa3G852630.1	CAAT-box	CAAAT	1904	5	+	Pisum sativum	common cis-acting element in promoter and enhancer regions
Csa3G852630.1	CAAT-box	CAAAT	1907	5	-	Pisum sativum	common cis-acting element in promoter and enhancer regions
Csa3G852630.1	CAAT-box	CAAT	1928	4	+	Nicotiana glutinosa
Csa3G852630.1	CAAT-box	CAAAT	1979	5	+	Pisum sativum	common cis-acting element in promoter and enhancer regions
Csa3G852630.1	CAAT-box	CAAAT	1988	5	+	Pisum sativum	common cis-acting element in promoter and enhancer regions
Csa3G852630.1	CAAT-box	CAAAT	1991	5	-	Pisum sativum	common cis-acting element in promoter and enhancer regions
Csa3G852630.1	GT1-motif	GGTTAAT	1015	7	+	Avena sativa	light responsive element
Csa3G852630.1	ERE	ATTTTAAA	77	8	+	Nicotiana glutinos
Csa3G852630.1	Myc	TCTCTTA	629	7	+	Arabidopsis thaliana
Csa3G852630.1	Myb-binding site	CAACAG	793	6	+	Nicotiana tabacum
Csa3G852630.1	ARE	AAACCA	93	6	+	Zea mays	cis-acting regulatory element essential for the anaerobic induction
Csa3G852630.1	as-1	TGACG	385	5	+	Arabidopsis thaliana
Csa3G852630.1	as-1	TGACG	1108	5	-	Arabidopsis thaliana
Csa3G852630.1	TGACG-motif	TGACG	385	5	+	Hordeum vulgare	cis-acting regulatory element involved in the MeJA-responsiveness
Csa3G852630.1	TGACG-motif	TGACG	1108	5	-	Hordeum vulgare	cis-acting regulatory element involved in the MeJA-responsiveness
Csa3G852630.1	CGTCA-motif	CGTCA	385	5	-	Hordeum vulgare	cis-acting regulatory element involved in the MeJA-responsiveness
Csa3G852630.1	CGTCA-motif	CGTCA	1108	5	+	Hordeum vulgare	cis-acting regulatory element involved in the MeJA-responsiveness
Csa3G852630.1	TATA	TATAAAAT	28	8	+	Arabidopsis thaliana
Csa3G852640.1	G-Box	CACGTG	207	6	+	Pisum sativum	cis-acting regulatory element involved in light responsiveness
Csa3G852640.1	G-Box	CACGTT	245	6	+	Pisum sativum	cis-acting regulatory element involved in light responsiveness
Csa3G852640.1	G-Box	CACGTG	1230	6	-	Pisum sativum	cis-acting regulatory element involved in light responsiveness
Csa3G852640.1	TATA	TATAAAAT	586	8	+	Arabidopsis thaliana
Csa3G852640.1	TATA	TATAAAAT	892	8	+	Arabidopsis thaliana
Csa3G852640.1	as-1	TGACG	527	5	+	Arabidopsis thaliana
Csa3G852640.1	ARE	AAACCA	1583	6	-	Zea mays	cis-acting regulatory element essential for the anaerobic induction
Csa3G852640.1	ARE	AAACCA	1609	6	-	Zea mays	cis-acting regulatory element essential for the anaerobic induction
Csa3G852640.1	TGACG-motif	TGACG	527	5	+	Hordeum vulgare	cis-acting regulatory element involved in the MeJA-responsiveness
Csa3G852640.1	CGTCA-motif	CGTCA	527	5	-	Hordeum vulgare	cis-acting regulatory element involved in the MeJA-responsiveness
Csa3G852640.1	G-box	ACACGTGT	206	8	+	Brassica napus	cis-acting regulatory element involved in light responsiveness
Csa3G852640.1	G-box	CACGTG	207	6	+	Arabidopsis thaliana	cis-acting regulatory element involved in light responsiveness
Csa3G852640.1	G-box	CACGTG	1230	6	-	Arabidopsis thaliana	cis-acting regulatory element involved in light responsiveness
Csa3G852640.1	CAAT-box	CAAAT	64	5	-	Pisum sativum	common cis-acting element in promoter and enhancer regions
Csa3G852640.1	CAAT-box	CAAAT	115	5	-	Pisum sativum	common cis-acting element in promoter and enhancer regions
Csa3G852640.1	CAAT-box	CAAT	162	4	-	Nicotiana glutinosa
Csa3G852640.1	CAAT-box	CAAAT	179	5	-	Pisum sativum	common cis-acting element in promoter and enhancer regions
Csa3G852640.1	CAAT-box	CAAT	332	4	-	Nicotiana glutinosa
Csa3G852640.1	CAAT-box	CAAAT	363	5	+	Pisum sativum	common cis-acting element in promoter and enhancer regions
Csa3G852640.1	CAAT-box	CAAT	374	4	+	Nicotiana glutinosa
Csa3G852640.1	CAAT-box	CAAT	376	4	-	Nicotiana glutinosa
Csa3G852640.1	CAAT-box	CCAAT	396	5	+	Arabidopsis thaliana	common cis-acting element in promoter and enhancer regions
Csa3G852640.1	CAAT-box	CAAT	397	4	+	Nicotiana glutinosa
Csa3G852640.1	CAAT-box	CAAAT	423	5	-	Pisum sativum	common cis-acting element in promoter and enhancer regions
Csa3G852640.1	CAAT-box	CCAAT	446	5	-	Arabidopsis thaliana	common cis-acting element in promoter and enhancer regions
Csa3G852640.1	CAAT-box	CAAAT	464	5	-	Pisum sativum	common cis-acting element in promoter and enhancer regions
Csa3G852640.1	CAAT-box	CAAAT	518	5	+	Pisum sativum	common cis-acting element in promoter and enhancer regions
Csa3G852640.1	CAAT-box	CAAT	521	4	-	Nicotiana glutinosa
Csa3G852640.1	CAAT-box	CAAAT	580	5	-	Pisum sativum	common cis-acting element in promoter and enhancer regions
Csa3G852640.1	CAAT-box	CAAAT	601	5	+	Pisum sativum	common cis-acting element in promoter and enhancer regions
Csa3G852640.1	CAAT-box	CAAT	641	4	+	Nicotiana glutinosa
Csa3G852640.1	CAAT-box	CAAT	877	4	-	Nicotiana glutinosa
Csa3G852640.1	CAAT-box	CAAT	1088	4	+	Nicotiana glutinosa
Csa3G852640.1	CAAT-box	CAAT	1142	4	+	Nicotiana glutinosa
Csa3G852640.1	CAAT-box	CAAT	1236	4	+	Nicotiana glutinosa
Csa3G852640.1	CAAT-box	CAAT	1311	4	-	Nicotiana glutinosa
Csa3G852640.1	CAAT-box	CAAT	1470	4	-	Nicotiana glutinosa
Csa3G852640.1	CAAT-box	CCAAT	1607	5	-	Arabidopsis thaliana	common cis-acting element in promoter and enhancer regions
Csa3G852640.1	CAAT-box	CAAAT	1667	5	-	Pisum sativum	common cis-acting element in promoter and enhancer regions
Csa3G852640.1	CAAT-box	CAAT	1677	4	+	Nicotiana glutinosa
Csa3G852640.1	CAAT-box	CAAAT	1710	5	-	Pisum sativum	common cis-acting element in promoter and enhancer regions
Csa3G852640.1	CAAT-box	CAAAT	1822	5	-	Pisum sativum	common cis-acting element in promoter and enhancer regions
Csa3G852640.1	CAAT-box	CAAT	1861	4	+	Nicotiana glutinosa
Csa3G852640.1	CAAT-box	CCAAT	1972	5	+	Arabidopsis thaliana	common cis-acting element in promoter and enhancer regions
Csa3G852640.1	CAAT-box	CAAT	1973	4	+	Nicotiana glutinosa
Csa3G852640.1	Box 4	ATTAAT	128	6	+	Petroselinum crispum	part of a conserved DNA module involved in light responsiveness
Csa3G852640.1	Box 4	ATTAAT	147	6	+	Petroselinum crispum	part of a conserved DNA module involved in light responsiveness
Csa3G852640.1	Box 4	ATTAAT	166	6	+	Petroselinum crispum	part of a conserved DNA module involved in light responsiveness
Csa3G852640.1	Box 4	ATTAAT	501	6	+	Petroselinum crispum	part of a conserved DNA module involved in light responsiveness
Csa3G852640.1	Box 4	ATTAAT	858	6	+	Petroselinum crispum	part of a conserved DNA module involved in light responsiveness
Csa3G852640.1	Box 4	ATTAAT	905	6	+	Petroselinum crispum	part of a conserved DNA module involved in light responsiveness
Csa3G852640.1	Box 4	ATTAAT	1212	6	-	Petroselinum crispum	part of a conserved DNA module involved in light responsiveness
Csa3G852640.1	AT~TATA-box	TATATA	768	6	+	Arabidopsis thaliana
Csa3G852640.1	AT~TATA-box	TATATA	1135	6	-	Arabidopsis thaliana
Csa3G852640.1	MYB	TAACCA	555	6	+	Arabidopsis thaliana
Csa3G852640.1	MYB	TAACCA	597	6	+	Arabidopsis thaliana
Csa3G852640.1	MYB	CAACCA	1616	6	+	Arabidopsis thaliana
Csa3G852640.1	MYB	TAACCA	1955	6	+	Arabidopsis thaliana
Csa3G852640.1	GT1-motif	GGTTAA	554	6	-	Arabidopsis thaliana	light responsive element
Csa3G852640.1	GT1-motif	GGTTAA	596	6	-	Arabidopsis thaliana	light responsive element
Csa3G852640.1	GT1-motif	GTGTGTGAA	1992	9	-	Solanum tuberosum	light responsive element
Csa3G852640.1	ERE	ATTTTAAA	758	8	+	Nicotiana glutinos
Csa3G852640.1	ERE	ATTTTAAA	1055	8	+	Nicotiana glutinos
Csa3G852640.1	ERE	ATTTTAAA	1062	8	+	Nicotiana glutinos
Csa3G852640.1	ERE	ATTTTAAA	1097	8	-	Nicotiana glutinos
Csa3G852640.1	WUN-motif	AAATTACT	343	8	+	Nicotiana glutinosa
Csa3G852640.1	MYC	CAATTG	374	6	+	Arabidopsis thaliana
Csa3G852640.1	MYC	CATGTG	1222	6	-	Arabidopsis thaliana
Csa3G852640.1	MYC	CATTTG	1666	6	+	Arabidopsis thaliana
Csa3G852640.1	MYC	CATTTG	1709	6	+	Arabidopsis thaliana
Csa3G852640.1	TCA-element	CCATCTTTTT	533	9	+	Nicotiana tabacum	cis-acting element involved in salicylic acid responsiveness
Csa3G852640.1	WRE3	CCACCT	533	6	+	Pisum sativum
Csa3G852640.1	WRE3	CCACCT	1556	6	-	Pisum sativum
Csa3G852640.1	LTR	CCGAAA	1779	6	-	Hordeum vulgare	cis-acting element involved in low-temperature responsiveness
Csa3G852640.1	ABRE	CACGTG	207	6	+	Arabidopsis thaliana	cis-acting element involved in the abscisic acid responsiveness
Csa3G852640.1	ABRE	ACGTG	208	5	+	Arabidopsis thaliana	cis-acting element involved in the abscisic acid responsiveness
Csa3G852640.1	ABRE	ACGTG	245	5	-	Arabidopsis thaliana	cis-acting element involved in the abscisic acid responsiveness
Csa3G852640.1	ABRE	CACGTG	1230	6	-	Arabidopsis thaliana	cis-acting element involved in the abscisic acid responsiveness
Csa3G852640.1	ABRE	ACGTG	1231	5	+	Arabidopsis thaliana	cis-acting element involved in the abscisic acid responsiveness
Csa3G852640.1	TGA-element	AACGAC	1598	6	-	Brassica oleracea	auxin-responsive element
Csa3G852640.1	Unnamed__4	CTCC	1540	4	-	Petroselinum hortense
Csa3G852640.1	Unnamed__4	CTCC	1560	4	-	Petroselinum hortense
Csa3G852640.1	Unnamed__4	CTCC	1657	4	-	Petroselinum hortense
Csa3G852640.1	Unnamed__4	CTCC	1831	4	-	Petroselinum hortense
Csa3G852640.1	Unnamed__4	CTCC	1947	4	+	Petroselinum hortense
Csa3G852640.1	Unnamed__4	CTCC	1977	4	+	Petroselinum hortense
Csa3G852640.1	TATA-box	TATAA	13	5	-	Arabidopsis thaliana	core promoter element around -30 of transcription start
Csa3G852640.1	TATA-box	TATA	14	4	+	Arabidopsis thaliana	core promoter element around -30 of transcription start
Csa3G852640.1	TATA-box	TATA	20	4	+	Arabidopsis thaliana	core promoter element around -30 of transcription start
Csa3G852640.1	TATA-box	TATTTAAA	105	8	-	Arabidopsis thaliana	core promoter element around -30 of transcription start
Csa3G852640.1	TATA-box	ATATAA	288	6	+	Brassica oleracea	core promoter element around -30 of transcription start
Csa3G852640.1	TATA-box	TATA	289	4	+	Arabidopsis thaliana	core promoter element around -30 of transcription start
Csa3G852640.1	TATA-box	ATTATA	483	6	+	Brassica napus	core promoter element around -30 of transcription start
Csa3G852640.1	TATA-box	TATAA	484	5	-	Arabidopsis thaliana	core promoter element around -30 of transcription start
Csa3G852640.1	TATA-box	TATA	485	4	+	Arabidopsis thaliana	core promoter element around -30 of transcription start
Csa3G852640.1	TATA-box	TATAAAA	510	7	-	Pisum sativum	core promoter element around -30 of transcription start
Csa3G852640.1	TATA-box	TATAAA	511	6	-	Helianthus annuus	core promoter element around -30 of transcription start
Csa3G852640.1	TATA-box	TATAA	512	5	-	Arabidopsis thaliana	core promoter element around -30 of transcription start
Csa3G852640.1	TATA-box	TATA	513	4	+	Arabidopsis thaliana	core promoter element around -30 of transcription start
Csa3G852640.1	TATA-box	TATA	586	4	+	Arabidopsis thaliana	core promoter element around -30 of transcription start
Csa3G852640.1	TATA-box	TATA	614	4	+	Arabidopsis thaliana	core promoter element around -30 of transcription start
Csa3G852640.1	TATA-box	taTATAAAtc	687	9	-	Arabidopsis thaliana	core promoter element around -30 of transcription start
Csa3G852640.1	TATA-box	TATAAAT	701	7	-	Brassica juncea	core promoter element around -30 of transcription start
Csa3G852640.1	TATA-box	TATAAA	702	6	-	Helianthus annuus	core promoter element around -30 of transcription start
Csa3G852640.1	TATA-box	TATAA	703	5	-	Arabidopsis thaliana	core promoter element around -30 of transcription start
Csa3G852640.1	TATA-box	TATA	704	4	+	Arabidopsis thaliana	core promoter element around -30 of transcription start
Csa3G852640.1	TATA-box	ATATAT	767	6	+	Brassica napus	core promoter element around -30 of transcription start
Csa3G852640.1	TATA-box	TATATA	768	6	+	Arabidopsis thaliana	core promoter element around -30 of transcription start
Csa3G852640.1	TATA-box	ATATAT	769	6	+	Brassica napus	core promoter element around -30 of transcription start
Csa3G852640.1	TATA-box	TATA	770	4	+	Arabidopsis thaliana	core promoter element around -30 of transcription start
Csa3G852640.1	TATA-box	TATA	784	4	+	Arabidopsis thaliana	core promoter element around -30 of transcription start
Csa3G852640.1	TATA-box	TATA	817	4	+	Arabidopsis thaliana	core promoter element around -30 of transcription start
Csa3G852640.1	TATA-box	ATATAA	891	6	+	Brassica oleracea	core promoter element around -30 of transcription start
Csa3G852640.1	TATA-box	TATA	892	4	+	Arabidopsis thaliana	core promoter element around -30 of transcription start
Csa3G852640.1	TATA-box	TATAAA	915	6	-	Helianthus annuus	core promoter element around -30 of transcription start
Csa3G852640.1	TATA-box	TATAA	916	5	-	Arabidopsis thaliana	core promoter element around -30 of transcription start
Csa3G852640.1	TATA-box	TATA	917	4	+	Arabidopsis thaliana	core promoter element around -30 of transcription start
Csa3G852640.1	TATA-box	ATTATA	940	6	+	Brassica napus	core promoter element around -30 of transcription start
Csa3G852640.1	TATA-box	TATAA	941	5	-	Arabidopsis thaliana	core promoter element around -30 of transcription start
Csa3G852640.1	TATA-box	TATA	942	4	+	Arabidopsis thaliana	core promoter element around -30 of transcription start
Csa3G852640.1	TATA-box	TATAAAT	960	7	-	Brassica juncea	core promoter element around -30 of transcription start
Csa3G852640.1	TATA-box	TATAAA	961	6	-	Helianthus annuus	core promoter element around -30 of transcription start
Csa3G852640.1	TATA-box	TATAA	962	5	-	Arabidopsis thaliana	core promoter element around -30 of transcription start
Csa3G852640.1	TATA-box	TATA	963	4	+	Arabidopsis thaliana	core promoter element around -30 of transcription start
Csa3G852640.1	TATA-box	TATAAATA	1018	8	-	Daucus carota	core promoter element around -30 of transcription start
Csa3G852640.1	TATA-box	TATAAAT	1019	7	-	Brassica juncea	core promoter element around -30 of transcription start
Csa3G852640.1	TATA-box	TATAAA	1020	6	-	Helianthus annuus	core promoter element around -30 of transcription start
Csa3G852640.1	TATA-box	TATAA	1021	5	-	Arabidopsis thaliana	core promoter element around -30 of transcription start
Csa3G852640.1	TATA-box	TATA	1022	4	-	Arabidopsis thaliana	core promoter element around -30 of transcription start
Csa3G852640.1	TATA-box	TATAA	1075	5	-	Arabidopsis thaliana	core promoter element around -30 of transcription start
Csa3G852640.1	TATA-box	TATA	1076	4	-	Arabidopsis thaliana	core promoter element around -30 of transcription start
Csa3G852640.1	TATA-box	TATACA	1104	6	-	Helianthus annuus	core promoter element around -30 of transcription start
Csa3G852640.1	TATA-box	TATA	1106	4	-	Arabidopsis thaliana	core promoter element around -30 of transcription start
Csa3G852640.1	TATA-box	TATATA	1135	6	-	Arabidopsis thaliana	core promoter element around -30 of transcription start
Csa3G852640.1	TATA-box	ATATAA	1136	6	+	Brassica oleracea	core promoter element around -30 of transcription start
Csa3G852640.1	TATA-box	TATA	1137	4	-	Arabidopsis thaliana	core promoter element around -30 of transcription start
Csa3G852640.1	TATA-box	ATTATA	1295	6	+	Brassica napus	core promoter element around -30 of transcription start
Csa3G852640.1	TATA-box	TATAA	1296	5	-	Arabidopsis thaliana	core promoter element around -30 of transcription start
Csa3G852640.1	TATA-box	TATA	1297	4	-	Arabidopsis thaliana	core promoter element around -30 of transcription start
Csa3G852640.1	TATA-box	ATATAA	1318	6	+	Brassica oleracea	core promoter element around -30 of transcription start
Csa3G852640.1	TATA-box	TATA	1319	4	-	Arabidopsis thaliana	core promoter element around -30 of transcription start
Csa3G852640.1	TATA-box	ATTATA	1385	6	+	Brassica napus	core promoter element around -30 of transcription start
Csa3G852640.1	TATA-box	TATAA	1386	5	-	Arabidopsis thaliana	core promoter element around -30 of transcription start
Csa3G852640.1	TATA-box	TATA	1387	4	-	Arabidopsis thaliana	core promoter element around -30 of transcription start
Csa3G852640.1	TATA-box	ccTATAAAaa	1495	10	-	Arabidopsis thaliana	core promoter element around -30 of transcription start
Csa3G852640.1	TATA-box	TATAAAA	1496	7	-	Pisum sativum	core promoter element around -30 of transcription start
Csa3G852640.1	TATA-box	TATAAA	1497	6	-	Helianthus annuus	core promoter element around -30 of transcription start
Csa3G852640.1	TATA-box	TATAA	1498	5	-	Arabidopsis thaliana	core promoter element around -30 of transcription start
Csa3G852640.1	TATA-box	TATA	1499	4	-	Arabidopsis thaliana	core promoter element around -30 of transcription start
Csa3G852640.1	TATA-box	TATA	1593	4	-	Arabidopsis thaliana	core promoter element around -30 of transcription start
Csa3G852640.1	TATA-box	TATACA	1637	6	-	Helianthus annuus	core promoter element around -30 of transcription start
Csa3G852640.1	TATA-box	TATA	1639	4	-	Arabidopsis thaliana	core promoter element around -30 of transcription start
Csa3G852640.1	TATA-box	ATTATA	1797	6	+	Brassica napus	core promoter element around -30 of transcription start
Csa3G852640.1	TATA-box	TATAA	1798	5	-	Arabidopsis thaliana	core promoter element around -30 of transcription start
Csa3G852640.1	TATA-box	TATA	1799	4	-	Arabidopsis thaliana	core promoter element around -30 of transcription start
Csa3G852640.1	TATA-box	TATAA	1851	5	-	Arabidopsis thaliana	core promoter element around -30 of transcription start
Csa3G852640.1	TATA-box	TATA	1852	4	-	Arabidopsis thaliana	core promoter element around -30 of transcription start
Csa3G852640.1	TATA-box	TATAAAA	1877	7	-	Pisum sativum	core promoter element around -30 of transcription start
Csa3G852640.1	TATA-box	TATAAA	1878	6	-	Helianthus annuus	core promoter element around -30 of transcription start
Csa3G852640.1	TATA-box	TATAA	1879	5	-	Arabidopsis thaliana	core promoter element around -30 of transcription start
Csa3G852640.1	TATA-box	TATA	1880	4	-	Arabidopsis thaliana	core promoter element around -30 of transcription start
Csa3G852640.1	AAGAA-motif	GAAAGAA	1688	7	+	Avena sativa
Csa3G852640.1	MYB-like sequence	TAACCA	555	6	+	Arabidopsis thaliana
Csa3G852640.1	MYB-like sequence	TAACCA	597	6	+	Arabidopsis thaliana
Csa3G852640.1	MYB-like sequence	TAACCA	1955	6	+	Arabidopsis thaliana
Csa3G852640.1	GATA-motif	AAGATAAGATT	1327	10	+	Arabidopsis thaliana	part of a light responsive element
Csa3G853140.1	GATA-motif	AAGGATAAGG	1419	9	+	Solanum tuberosum	part of a light responsive element
Csa3G853140.1	GATA-motif	AAGGATAAGG	1818	9	+	Solanum tuberosum	part of a light responsive element
Csa3G853140.1	AE-box	AGAAACAA	302	8	-	Arabidopsis thaliana	part of a module for light response
Csa3G853140.1	AAGAA-motif	GAAAGAA	306	7	-	Avena sativa
Csa3G853140.1	MYB-like sequence	TAACCA	169	6	-	Arabidopsis thaliana
Csa3G853140.1	Unnamed__1	CGTGG	1327	5	+	Zea mays
Csa3G853140.1	TCT-motif	TCTTAC	686	6	+	Arabidopsis thaliana	part of a light responsive element
Csa3G853140.1	TCT-motif	TCTTAC	1460	6	+	Arabidopsis thaliana	part of a light responsive element
Csa3G853140.1	TGA-element	AACGAC	633	6	-	Brassica oleracea	auxin-responsive element
Csa3G853140.1	circadian	CAAAGATATC	1908	9	+	Lycopersicon esculentum	cis-acting regulatory element involved in circadian control
Csa3G853140.1	I-box	ccttatcct	1420	9	-	Arabidopsis thaliana	part of a light responsive element
Csa3G853140.1	I-box	gGATAAGGTG	1421	9	+	Zea mays	part of a light responsive element
Csa3G853140.1	I-box	atGATAAGGTC	1700	10	-	Helianthus annuus	part of a light responsive element
Csa3G853140.1	ABRE	CACGTG	1993	6	-	Arabidopsis thaliana	cis-acting element involved in the abscisic acid responsiveness
Csa3G853140.1	ABRE	ACGTG	1994	5	+	Arabidopsis thaliana	cis-acting element involved in the abscisic acid responsiveness
Csa3G853140.1	TATA-box	TACAAAA	11	7	+	Oryza sativa	core promoter element around -30 of transcription start
Csa3G853140.1	TATA-box	ATATAA	119	6	+	Brassica oleracea	core promoter element around -30 of transcription start
Csa3G853140.1	TATA-box	TATA	120	4	+	Arabidopsis thaliana	core promoter element around -30 of transcription start
Csa3G853140.1	TATA-box	TAAAGATT	294	8	+	Arabidopsis thaliana	core promoter element around -30 of transcription start
Csa3G853140.1	TATA-box	TATAAAA	736	7	-	Pisum sativum	core promoter element around -30 of transcription start
Csa3G853140.1	TATA-box	TATAAA	737	6	-	Helianthus annuus	core promoter element around -30 of transcription start
Csa3G853140.1	TATA-box	TATATAA	738	7	-	Arabidopsis thaliana	core promoter element around -30 of transcription start
Csa3G853140.1	TATA-box	TATATA	739	6	+	Arabidopsis thaliana	core promoter element around -30 of transcription start
Csa3G853140.1	TATA-box	ATATAT	740	6	+	Brassica napus	core promoter element around -30 of transcription start
Csa3G853140.1	TATA-box	TATATA	741	6	+	Arabidopsis thaliana	core promoter element around -30 of transcription start
Csa3G853140.1	TATA-box	ATATAT	742	6	+	Brassica napus	core promoter element around -30 of transcription start
Csa3G853140.1	TATA-box	TATATA	743	6	+	Arabidopsis thaliana	core promoter element around -30 of transcription start
Csa3G853140.1	TATA-box	TATA	745	4	+	Arabidopsis thaliana	core promoter element around -30 of transcription start
Csa3G853140.1	TATA-box	taTATAAAtc	782	9	-	Arabidopsis thaliana	core promoter element around -30 of transcription start
Csa3G853140.1	TATA-box	TATAAAT	783	7	-	Brassica juncea	core promoter element around -30 of transcription start
Csa3G853140.1	TATA-box	TATAAA	784	6	-	Helianthus annuus	core promoter element around -30 of transcription start
Csa3G853140.1	TATA-box	TATATAA	785	7	-	Arabidopsis thaliana	core promoter element around -30 of transcription start
Csa3G853140.1	TATA-box	TATATA	786	6	+	Arabidopsis thaliana	core promoter element around -30 of transcription start
Csa3G853140.1	TATA-box	ATATAT	787	6	+	Brassica napus	core promoter element around -30 of transcription start
Csa3G853140.1	TATA-box	TATATA	788	6	+	Arabidopsis thaliana	core promoter element around -30 of transcription start
Csa3G853140.1	TATA-box	ATATAT	789	6	+	Brassica napus	core promoter element around -30 of transcription start
Csa3G853140.1	TATA-box	TATA	790	4	+	Arabidopsis thaliana	core promoter element around -30 of transcription start
Csa3G853140.1	TATA-box	taTATAAAtc	824	9	-	Arabidopsis thaliana	core promoter element around -30 of transcription start
Csa3G853140.1	TATA-box	TATAAAT	825	7	-	Brassica juncea	core promoter element around -30 of transcription start
Csa3G853140.1	TATA-box	TATAAA	826	6	-	Helianthus annuus	core promoter element around -30 of transcription start
Csa3G853140.1	TATA-box	TATATAA	827	7	-	Arabidopsis thaliana	core promoter element around -30 of transcription start
Csa3G853140.1	TATA-box	TATATA	828	6	+	Arabidopsis thaliana	core promoter element around -30 of transcription start
Csa3G853140.1	TATA-box	ATATAT	829	6	+	Brassica napus	core promoter element around -30 of transcription start
Csa3G853140.1	TATA-box	TATA	830	4	+	Arabidopsis thaliana	core promoter element around -30 of transcription start
Csa3G853140.1	TATA-box	ATATAA	843	6	+	Brassica oleracea	core promoter element around -30 of transcription start
Csa3G853140.1	TATA-box	TATA	844	4	+	Arabidopsis thaliana	core promoter element around -30 of transcription start
Csa3G853140.1	TATA-box	ATATAT	851	6	+	Brassica napus	core promoter element around -30 of transcription start
Csa3G853140.1	TATA-box	TATATA	852	6	+	Arabidopsis thaliana	core promoter element around -30 of transcription start
Csa3G853140.1	TATA-box	ATATAT	853	6	+	Brassica napus	core promoter element around -30 of transcription start
Csa3G853140.1	TATA-box	TATATA	854	6	+	Arabidopsis thaliana	core promoter element around -30 of transcription start
Csa3G853140.1	TATA-box	ATATAT	855	6	+	Brassica napus	core promoter element around -30 of transcription start
Csa3G853140.1	TATA-box	TATATA	856	6	+	Arabidopsis thaliana	core promoter element around -30 of transcription start
Csa3G853140.1	TATA-box	ATATAT	857	6	+	Brassica napus	core promoter element around -30 of transcription start
Csa3G853140.1	TATA-box	TATA	858	4	+	Arabidopsis thaliana	core promoter element around -30 of transcription start
Csa3G853140.1	TATA-box	ATTATA	1389	6	+	Brassica napus	core promoter element around -30 of transcription start
Csa3G853140.1	TATA-box	TATAA	1390	5	-	Arabidopsis thaliana	core promoter element around -30 of transcription start
Csa3G853140.1	TATA-box	TATA	1391	4	-	Arabidopsis thaliana	core promoter element around -30 of transcription start
Csa3G853140.1	TATA-box	TATTTAAA	1405	8	+	Arabidopsis thaliana	core promoter element around -30 of transcription start
Csa3G853140.1	TATA-box	TATTTAAA	1407	8	-	Arabidopsis thaliana	core promoter element around -30 of transcription start
Csa3G853140.1	TATA-box	TACAAAA	1511	7	+	Oryza sativa	core promoter element around -30 of transcription start
Csa3G853140.1	TATA-box	ATATAT	1640	6	-	Brassica napus	core promoter element around -30 of transcription start
Csa3G853140.1	TATA-box	TATATA	1641	6	-	Arabidopsis thaliana	core promoter element around -30 of transcription start
Csa3G853140.1	TATA-box	ATATAT	1642	6	-	Brassica napus	core promoter element around -30 of transcription start
Csa3G853140.1	TATA-box	TATATA	1643	6	-	Arabidopsis thaliana	core promoter element around -30 of transcription start
Csa3G853140.1	TATA-box	ATATAT	1644	6	-	Brassica napus	core promoter element around -30 of transcription start
Csa3G853140.1	TATA-box	TATA	1645	4	-	Arabidopsis thaliana	core promoter element around -30 of transcription start
Csa3G853140.1	TATA-box	ATTATA	1750	6	+	Brassica napus	core promoter element around -30 of transcription start
Csa3G853140.1	TATA-box	TATAA	1751	5	-	Arabidopsis thaliana	core promoter element around -30 of transcription start
Csa3G853140.1	TATA-box	TATA	1752	4	-	Arabidopsis thaliana	core promoter element around -30 of transcription start
Csa3G853140.1	TATA-box	TATAA	1843	5	-	Arabidopsis thaliana	core promoter element around -30 of transcription start
Csa3G853140.1	TATA-box	TATA	1844	4	-	Arabidopsis thaliana	core promoter element around -30 of transcription start
Csa3G853140.1	TATA-box	TATAAGAA	1951	8	-	Zea mays	core promoter element around -30 of transcription start
Csa3G853140.1	TATA-box	TATAA	1954	5	-	Arabidopsis thaliana	core promoter element around -30 of transcription start
Csa3G853140.1	TATA-box	TATA	1955	4	-	Arabidopsis thaliana	core promoter element around -30 of transcription start
Csa3G853140.1	Myb	CAACTG	213	6	-	Arabidopsis thaliana
Csa3G853140.1	Unnamed__4	CTCC	331	4	+	Petroselinum hortense
Csa3G853140.1	Unnamed__4	CTCC	380	4	+	Petroselinum hortense
Csa3G853140.1	Unnamed__4	CTCC	491	4	-	Petroselinum hortense
Csa3G853140.1	Unnamed__4	CTCC	1602	4	+	Petroselinum hortense
Csa3G853140.1	GT1-motif	GGTTAA	1280	6	-	Arabidopsis thaliana	light responsive element
Csa3G853140.1	GT1-motif	GGTTAA	1563	6	-	Arabidopsis thaliana	light responsive element
Csa3G853140.1	ERE	ATTTTAAA	314	8	+	Nicotiana glutinos
Csa3G853140.1	CAAT-box	CAAT	1	4	+	Nicotiana glutinosa
Csa3G853140.1	CAAT-box	CCAAT	30	5	-	Arabidopsis thaliana	common cis-acting element in promoter and enhancer regions
Csa3G853140.1	CAAT-box	CAAAT	54	5	-	Pisum sativum	common cis-acting element in promoter and enhancer regions
Csa3G853140.1	CAAT-box	CAAT	66	4	-	Nicotiana glutinosa
Csa3G853140.1	CAAT-box	CAAAT	70	5	-	Pisum sativum	common cis-acting element in promoter and enhancer regions
Csa3G853140.1	CAAT-box	CAAAT	103	5	-	Pisum sativum	common cis-acting element in promoter and enhancer regions
Csa3G853140.1	CAAT-box	CAAAT	116	5	+	Pisum sativum	common cis-acting element in promoter and enhancer regions
Csa3G853140.1	CAAT-box	CAAAT	145	5	-	Pisum sativum	common cis-acting element in promoter and enhancer regions
Csa3G853140.1	CAAT-box	CAAAT	166	5	-	Pisum sativum	common cis-acting element in promoter and enhancer regions
Csa3G853140.1	CAAT-box	CAAAT	197	5	+	Pisum sativum	common cis-acting element in promoter and enhancer regions
Csa3G853140.1	CAAT-box	CCAAT	287	5	-	Arabidopsis thaliana	common cis-acting element in promoter and enhancer regions
Csa3G853140.1	CAAT-box	CAAAT	347	5	-	Pisum sativum	common cis-acting element in promoter and enhancer regions
Csa3G853140.1	CAAT-box	CAAT	428	4	+	Nicotiana glutinosa
Csa3G853140.1	CAAT-box	CAAT	463	4	-	Nicotiana glutinosa
Csa3G853140.1	CAAT-box	CAAAT	609	5	-	Pisum sativum	common cis-acting element in promoter and enhancer regions
Csa3G853140.1	CAAT-box	CAAAT	664	5	-	Pisum sativum	common cis-acting element in promoter and enhancer regions
Csa3G853140.1	CAAT-box	CCAAT	705	5	-	Arabidopsis thaliana	common cis-acting element in promoter and enhancer regions
Csa3G853140.1	CAAT-box	CAAAT	1307	5	-	Pisum sativum	common cis-acting element in promoter and enhancer regions
Csa3G853140.1	CAAT-box	CAAT	1312	4	+	Nicotiana glutinosa
Csa3G853140.1	CAAT-box	CAAT	1387	4	+	Nicotiana glutinosa
Csa3G853140.1	CAAT-box	CAAT	1414	4	-	Nicotiana glutinosa
Csa3G853140.1	CAAT-box	CAAT	1553	4	-	Nicotiana glutinosa
Csa3G853140.1	CAAT-box	CAAAT	1557	5	+	Pisum sativum	common cis-acting element in promoter and enhancer regions
Csa3G853140.1	CAAT-box	CAAAT	1592	5	-	Pisum sativum	common cis-acting element in promoter and enhancer regions
Csa3G853140.1	CAAT-box	CAAT	1618	4	+	Nicotiana glutinosa
Csa3G853140.1	CAAT-box	CCAAT	1717	5	+	Arabidopsis thaliana	common cis-acting element in promoter and enhancer regions
Csa3G853140.1	CAAT-box	CAAT	1718	4	+	Nicotiana glutinosa
Csa3G853140.1	CAAT-box	CAAAT	1747	5	+	Pisum sativum	common cis-acting element in promoter and enhancer regions
Csa3G853140.1	CAAT-box	CAAAT	1775	5	-	Pisum sativum	common cis-acting element in promoter and enhancer regions
Csa3G853140.1	CAAT-box	CCAAT	1835	5	+	Arabidopsis thaliana	common cis-acting element in promoter and enhancer regions
Csa3G853140.1	CAAT-box	CAAT	1836	4	+	Nicotiana glutinosa
Csa3G853140.1	CAAT-box	CAAAT	1838	5	-	Pisum sativum	common cis-acting element in promoter and enhancer regions
Csa3G853140.1	CAAT-box	CAAT	1875	4	+	Nicotiana glutinosa
Csa3G853140.1	CAAT-box	CAAT	1927	4	-	Nicotiana glutinosa
Csa3G853140.1	AT~TATA-box	TATATAAA	737	8	-	Arabidopsis thaliana
Csa3G853140.1	AT~TATA-box	TATATA	739	6	+	Arabidopsis thaliana
Csa3G853140.1	AT~TATA-box	TATATA	741	6	+	Arabidopsis thaliana
Csa3G853140.1	AT~TATA-box	TATATA	743	6	+	Arabidopsis thaliana
Csa3G853140.1	AT~TATA-box	TATATAAA	784	8	-	Arabidopsis thaliana
Csa3G853140.1	AT~TATA-box	TATATA	786	6	+	Arabidopsis thaliana
Csa3G853140.1	AT~TATA-box	TATATA	788	6	+	Arabidopsis thaliana
Csa3G853140.1	AT~TATA-box	TATATAAA	826	8	-	Arabidopsis thaliana
Csa3G853140.1	AT~TATA-box	TATATA	828	6	+	Arabidopsis thaliana
Csa3G853140.1	AT~TATA-box	TATATA	852	6	+	Arabidopsis thaliana
Csa3G853140.1	AT~TATA-box	TATATA	854	6	+	Arabidopsis thaliana
Csa3G853140.1	AT~TATA-box	TATATA	856	6	+	Arabidopsis thaliana
Csa3G853140.1	AT~TATA-box	TATATA	1641	6	-	Arabidopsis thaliana
Csa3G853140.1	AT~TATA-box	TATATA	1643	6	-	Arabidopsis thaliana
Csa3G853140.1	Box 4	ATTAAT	26	6	+	Petroselinum crispum	part of a conserved DNA module involved in light responsiveness
Csa3G853140.1	Box 4	ATTAAT	1268	6	-	Petroselinum crispum	part of a conserved DNA module involved in light responsiveness
Csa3G853140.1	MYB	TAACCA	169	6	-	Arabidopsis thaliana
Csa3G853140.1	MYC	CATTTG	197	6	-	Arabidopsis thaliana
Csa3G853140.1	MYC	CATTTG	1774	6	+	Arabidopsis thaliana
Csa3G853140.1	STRE	AGGGG	1607	5	-	Arabidopsis thaliana
Csa3G853140.1	ARE	AAACCA	204	6	-	Zea mays	cis-acting regulatory element essential for the anaerobic induction
Csa3G853140.1	as-1	TGACG	239	5	+	Arabidopsis thaliana
Csa3G853140.1	as-1	TGACG	1448	5	+	Arabidopsis thaliana
Csa3G853140.1	CGTCA-motif	CGTCA	239	5	-	Hordeum vulgare	cis-acting regulatory element involved in the MeJA-responsiveness
Csa3G853140.1	CGTCA-motif	CGTCA	1448	5	-	Hordeum vulgare	cis-acting regulatory element involved in the MeJA-responsiveness
Csa3G853140.1	TGACG-motif	TGACG	239	5	+	Hordeum vulgare	cis-acting regulatory element involved in the MeJA-responsiveness
Csa3G853140.1	TGACG-motif	TGACG	1448	5	+	Hordeum vulgare	cis-acting regulatory element involved in the MeJA-responsiveness
Csa3G853140.1	MBS	CAACTG	213	6	-	Arabidopsis thaliana	MYB binding site involved in drought-inducibility
Csa3G853140.1	G-Box	CACGTG	1993	6	-	Pisum sativum	cis-acting regulatory element involved in light responsiveness
Csa3G853140.1	G-box	CACGTG	1993	6	-	Arabidopsis thaliana	cis-acting regulatory element involved in light responsiveness
Csa3G853140.1	MRE	AACCTAA	1282	7	+	Petroselinum crispum	MYB binding site involved in light responsiveness
Csa3G853140.1	Myc	TCTCTTA	1862	7	+	Arabidopsis thaliana
Csa3G853140.1	Unnamed__5	TGTAATAATATATTTATATT	844	18	+	Glycine max cv. Provar	SEF1 factor binding site
Csa3G853150.1	TCT-motif	TCTTAC	91	6	+	Arabidopsis thaliana	part of a light responsive element
Csa3G853150.1	TCT-motif	TCTTAC	285	6	+	Arabidopsis thaliana	part of a light responsive element
Csa3G853150.1	TCT-motif	TCTTAC	425	6	+	Arabidopsis thaliana	part of a light responsive element
Csa3G853150.1	ABRE	ACGTG	333	5	-	Arabidopsis thaliana	cis-acting element involved in the abscisic acid responsiveness
Csa3G853150.1	ABRE	ACGTG	1265	5	-	Arabidopsis thaliana	cis-acting element involved in the abscisic acid responsiveness
Csa3G853150.1	ABRE	ACGTG	1306	5	+	Arabidopsis thaliana	cis-acting element involved in the abscisic acid responsiveness
Csa3G853150.1	TATA-box	TATA	230	4	+	Arabidopsis thaliana	core promoter element around -30 of transcription start
Csa3G853150.1	TATA-box	TATAA	400	5	-	Arabidopsis thaliana	core promoter element around -30 of transcription start
Csa3G853150.1	TATA-box	TATA	401	4	+	Arabidopsis thaliana	core promoter element around -30 of transcription start
Csa3G853150.1	TATA-box	TATA	511	4	+	Arabidopsis thaliana	core promoter element around -30 of transcription start
Csa3G853150.1	TATA-box	TATA	530	4	+	Arabidopsis thaliana	core promoter element around -30 of transcription start
Csa3G853150.1	TATA-box	ATTATA	565	6	+	Brassica napus	core promoter element around -30 of transcription start
Csa3G853150.1	TATA-box	TATAA	566	5	-	Arabidopsis thaliana	core promoter element around -30 of transcription start
Csa3G853150.1	TATA-box	TATA	567	4	+	Arabidopsis thaliana	core promoter element around -30 of transcription start
Csa3G853150.1	TATA-box	TACATAAA	581	8	-	Oryza sativa	core promoter element around -30 of transcription start
Csa3G853150.1	TATA-box	ATATAA	791	6	+	Brassica oleracea	core promoter element around -30 of transcription start
Csa3G853150.1	TATA-box	TATA	792	4	+	Arabidopsis thaliana	core promoter element around -30 of transcription start
Csa3G853150.1	TATA-box	ATATAT	827	6	+	Brassica napus	core promoter element around -30 of transcription start
Csa3G853150.1	TATA-box	TATA	828	4	+	Arabidopsis thaliana	core promoter element around -30 of transcription start
Csa3G853150.1	TATA-box	TATAAAA	904	7	-	Pisum sativum	core promoter element around -30 of transcription start
Csa3G853150.1	TATA-box	TATAAA	905	6	-	Helianthus annuus	core promoter element around -30 of transcription start
Csa3G853150.1	TATA-box	TATAA	906	5	-	Arabidopsis thaliana	core promoter element around -30 of transcription start
Csa3G853150.1	TATA-box	TATA	907	4	+	Arabidopsis thaliana	core promoter element around -30 of transcription start
Csa3G853150.1	TATA-box	ATTATA	955	6	+	Brassica napus	core promoter element around -30 of transcription start
Csa3G853150.1	TATA-box	TATATAA	956	7	-	Arabidopsis thaliana	core promoter element around -30 of transcription start
Csa3G853150.1	TATA-box	TATATA	957	6	+	Arabidopsis thaliana	core promoter element around -30 of transcription start
Csa3G853150.1	TATA-box	ATATAT	958	6	+	Brassica napus	core promoter element around -30 of transcription start
Csa3G853150.1	TATA-box	TATA	959	4	+	Arabidopsis thaliana	core promoter element around -30 of transcription start
Csa3G853150.1	TATA-box	TATACA	1079	6	-	Helianthus annuus	core promoter element around -30 of transcription start
Csa3G853150.1	TATA-box	TATA	1081	4	-	Arabidopsis thaliana	core promoter element around -30 of transcription start
Csa3G853150.1	TATA-box	TATA	1364	4	-	Arabidopsis thaliana	core promoter element around -30 of transcription start
Csa3G853150.1	TATA-box	ATTATA	1463	6	+	Brassica napus	core promoter element around -30 of transcription start
Csa3G853150.1	TATA-box	TATAA	1464	5	-	Arabidopsis thaliana	core promoter element around -30 of transcription start
Csa3G853150.1	TATA-box	TATA	1465	4	-	Arabidopsis thaliana	core promoter element around -30 of transcription start
Csa3G853150.1	TATA-box	TATTTAAA	1467	8	+	Arabidopsis thaliana	core promoter element around -30 of transcription start
Csa3G853150.1	TATA-box	ATATAA	1476	6	+	Brassica oleracea	core promoter element around -30 of transcription start
Csa3G853150.1	TATA-box	TATA	1477	4	-	Arabidopsis thaliana	core promoter element around -30 of transcription start
Csa3G853150.1	TATA-box	TATA	1499	4	-	Arabidopsis thaliana	core promoter element around -30 of transcription start
Csa3G853150.1	TATA-box	TATAAAA	1689	7	-	Pisum sativum	core promoter element around -30 of transcription start
Csa3G853150.1	TATA-box	TATAAA	1690	6	-	Helianthus annuus	core promoter element around -30 of transcription start
Csa3G853150.1	TATA-box	TATAA	1691	5	-	Arabidopsis thaliana	core promoter element around -30 of transcription start
Csa3G853150.1	TATA-box	TATA	1692	4	-	Arabidopsis thaliana	core promoter element around -30 of transcription start
Csa3G853150.1	TATA-box	TATAAATA	1722	8	-	Daucus carota	core promoter element around -30 of transcription start
Csa3G853150.1	TATA-box	TATAAAT	1723	7	-	Brassica juncea	core promoter element around -30 of transcription start
Csa3G853150.1	TATA-box	TATAAA	1724	6	-	Helianthus annuus	core promoter element around -30 of transcription start
Csa3G853150.1	TATA-box	TATAA	1725	5	-	Arabidopsis thaliana	core promoter element around -30 of transcription start
Csa3G853150.1	TATA-box	TATA	1726	4	-	Arabidopsis thaliana	core promoter element around -30 of transcription start
Csa3G853150.1	TATA-box	ATTATA	1789	6	+	Brassica napus	core promoter element around -30 of transcription start
Csa3G853150.1	TATA-box	TATAA	1790	5	-	Arabidopsis thaliana	core promoter element around -30 of transcription start
Csa3G853150.1	TATA-box	TATA	1791	4	-	Arabidopsis thaliana	core promoter element around -30 of transcription start
Csa3G853150.1	MYB recognition site	CCGTTG	1821	6	-	Arabidopsis thaliana
Csa3G853150.1	Unnamed__4	CTCC	325	4	+	Petroselinum hortense
Csa3G853150.1	Unnamed__4	CTCC	1298	4	-	Petroselinum hortense
Csa3G853150.1	Unnamed__4	CTCC	1683	4	-	Petroselinum hortense
Csa3G853150.1	GATA-motif	AAGATAAGATT	391	10	-	Arabidopsis thaliana	part of a light responsive element
Csa3G853150.1	AAGAA-motif	GAAAGAA	215	7	-	Avena sativa
Csa3G853150.1	Gap-box	CAAATGAA(A/G)A	1650	9.5	+	Arabidopsis thaliana	part of a light responsive element
Csa3G853150.1	W box	TTGACC	444	6	+	Arabidopsis thaliana
Csa3G853150.1	CGTCA-motif	CGTCA	980	5	-	Hordeum vulgare	cis-acting regulatory element involved in the MeJA-responsiveness
Csa3G853150.1	CGTCA-motif	CGTCA	1767	5	+	Hordeum vulgare	cis-acting regulatory element involved in the MeJA-responsiveness
Csa3G853150.1	TGACG-motif	TGACG	980	5	+	Hordeum vulgare	cis-acting regulatory element involved in the MeJA-responsiveness
Csa3G853150.1	TGACG-motif	TGACG	1767	5	-	Hordeum vulgare	cis-acting regulatory element involved in the MeJA-responsiveness
Csa3G853150.1	as-1	TGACG	980	5	+	Arabidopsis thaliana
Csa3G853150.1	as-1	TGACG	1767	5	-	Arabidopsis thaliana
Csa3G853150.1	CCAAT-box	CAACGG	1821	6	+	Hordeum vulgare	MYBHv1 binding site
Csa3G853150.1	ARE	AAACCA	806	6	-	Zea mays	cis-acting regulatory element essential for the anaerobic induction
Csa3G853150.1	ARE	AAACCA	920	6	-	Zea mays	cis-acting regulatory element essential for the anaerobic induction
Csa3G853150.1	ARE	AAACCA	1085	6	-	Zea mays	cis-acting regulatory element essential for the anaerobic induction
Csa3G853150.1	ARE	AAACCA	1931	6	+	Zea mays	cis-acting regulatory element essential for the anaerobic induction
Csa3G853150.1	TC-rich repeats	ATTCTCTAAC	515	9	+	Nicotiana tabacum	cis-acting element involved in defense and stress responsiveness
Csa3G853150.1	TATA	TATAAAAT	907	8	+	Arabidopsis thaliana
Csa3G853150.1	TATC-box	TATCCCA	1945	7	+	Oryza sativa	cis-acting element involved in gibberellin-responsiveness
Csa3G853150.1	MRE	AACCTAA	414	7	-	Petroselinum crispum	MYB binding site involved in light responsiveness
Csa3G853150.1	G-box	TACGTG	333	6	-	Arabidopsis thaliana	cis-acting regulatory element involved in light responsiveness
Csa3G853150.1	G-box	CACGTC	1265	6	+	Zea mays	cis-acting regulatory element involved in light responsiveness
Csa3G853150.1	G-box	CACGTC	1305	6	-	Zea mays	cis-acting regulatory element involved in light responsiveness
Csa3G853150.1	Myb-binding site	CAACAG	1600	6	+	Nicotiana tabacum
Csa3G853150.1	ABRE4	CACGTA	333	6	+	Zea mays
Csa3G853150.1	ABRE3a	TACGTG	333	6	-	Zea mays
Csa3G853150.1	ERE	ATTTCATA	27	8	-	Nicotiana glutinos
Csa3G853150.1	ERE	ATTTCATA	852	8	-	Nicotiana glutinos
Csa3G853150.1	GT1-motif	GGTTAA	100	6	-	Arabidopsis thaliana	light responsive element
Csa3G853150.1	GT1-motif	GGTTAA	550	6	-	Arabidopsis thaliana	light responsive element
Csa3G853150.1	AT~TATA-box	TATATA	957	6	+	Arabidopsis thaliana
Csa3G853150.1	Box 4	ATTAAT	1109	6	-	Petroselinum crispum	part of a conserved DNA module involved in light responsiveness
Csa3G853150.1	Box 4	ATTAAT	1113	6	-	Petroselinum crispum	part of a conserved DNA module involved in light responsiveness
Csa3G853150.1	MYB	CAACCA	177	6	+	Arabidopsis thaliana
Csa3G853150.1	MYB	CAACCA	1185	6	-	Arabidopsis thaliana
Csa3G853150.1	MYB	CAACCA	1277	6	-	Arabidopsis thaliana
Csa3G853150.1	MYB	CAACAG	1600	6	+	Arabidopsis thaliana
Csa3G853150.1	CAAT-box	CAAT	43	4	+	Nicotiana glutinosa
Csa3G853150.1	CAAT-box	CAAAT	50	5	-	Pisum sativum	common cis-acting element in promoter and enhancer regions
Csa3G853150.1	CAAT-box	CAAAT	119	5	-	Pisum sativum	common cis-acting element in promoter and enhancer regions
Csa3G853150.1	CAAT-box	CAAAT	167	5	+	Pisum sativum	common cis-acting element in promoter and enhancer regions
Csa3G853150.1	CAAT-box	CCAAT	234	5	+	Arabidopsis thaliana	common cis-acting element in promoter and enhancer regions
Csa3G853150.1	CAAT-box	CAAT	235	4	+	Nicotiana glutinosa
Csa3G853150.1	CAAT-box	CAAT	430	4	+	Nicotiana glutinosa
Csa3G853150.1	CAAT-box	CAAT	461	4	+	Nicotiana glutinosa
Csa3G853150.1	CAAT-box	CAAAT	463	5	-	Pisum sativum	common cis-acting element in promoter and enhancer regions
Csa3G853150.1	CAAT-box	CAAAT	471	5	-	Pisum sativum	common cis-acting element in promoter and enhancer regions
Csa3G853150.1	CAAT-box	CAAAT	576	5	-	Pisum sativum	common cis-acting element in promoter and enhancer regions
Csa3G853150.1	CAAT-box	CAAT	589	4	-	Nicotiana glutinosa
Csa3G853150.1	CAAT-box	CCAAT	597	5	+	Arabidopsis thaliana	common cis-acting element in promoter and enhancer regions
Csa3G853150.1	CAAT-box	CAAT	598	4	+	Nicotiana glutinosa
Csa3G853150.1	CAAT-box	CAAT	621	4	+	Nicotiana glutinosa
Csa3G853150.1	CAAT-box	CAAT	628	4	-	Nicotiana glutinosa
Csa3G853150.1	CAAT-box	CCAAT	804	5	-	Arabidopsis thaliana	common cis-acting element in promoter and enhancer regions
Csa3G853150.1	CAAT-box	CAAT	871	4	-	Nicotiana glutinosa
Csa3G853150.1	CAAT-box	CAAAT	890	5	-	Pisum sativum	common cis-acting element in promoter and enhancer regions
Csa3G853150.1	CAAT-box	CAAT	913	4	-	Nicotiana glutinosa
Csa3G853150.1	CAAT-box	CAAT	937	4	+	Nicotiana glutinosa
Csa3G853150.1	CAAT-box	CAAT	946	4	-	Nicotiana glutinosa
Csa3G853150.1	CAAT-box	CAAT	962	4	-	Nicotiana glutinosa
Csa3G853150.1	CAAT-box	CAAAT	977	5	-	Pisum sativum	common cis-acting element in promoter and enhancer regions
Csa3G853150.1	CAAT-box	CAAAT	1015	5	-	Pisum sativum	common cis-acting element in promoter and enhancer regions
Csa3G853150.1	CAAT-box	CAAT	1028	4	-	Nicotiana glutinosa
Csa3G853150.1	CAAT-box	CAAAT	1155	5	-	Pisum sativum	common cis-acting element in promoter and enhancer regions
Csa3G853150.1	CAAT-box	CAAT	1164	4	+	Nicotiana glutinosa
Csa3G853150.1	CAAT-box	CAAT	1205	4	+	Nicotiana glutinosa
Csa3G853150.1	CAAT-box	CAAT	1331	4	-	Nicotiana glutinosa
Csa3G853150.1	CAAT-box	CCAAT	1345	5	+	Arabidopsis thaliana	common cis-acting element in promoter and enhancer regions
Csa3G853150.1	CAAT-box	CAAT	1346	4	+	Nicotiana glutinosa
Csa3G853150.1	CAAT-box	CAAAT	1371	5	-	Pisum sativum	common cis-acting element in promoter and enhancer regions
Csa3G853150.1	CAAT-box	CAAT	1429	4	-	Nicotiana glutinosa
Csa3G853150.1	CAAT-box	CAAAT	1441	5	+	Pisum sativum	common cis-acting element in promoter and enhancer regions
Csa3G853150.1	CAAT-box	CAAT	1519	4	+	Nicotiana glutinosa
Csa3G853150.1	CAAT-box	CAAT	1636	4	+	Nicotiana glutinosa
Csa3G853150.1	CAAT-box	CAAAT	1650	5	+	Pisum sativum	common cis-acting element in promoter and enhancer regions
Csa3G853150.1	CAAT-box	CAAT	1807	4	+	Nicotiana glutinosa
Csa3G853150.1	CAAT-box	CAAAT	1900	5	+	Pisum sativum	common cis-acting element in promoter and enhancer regions
Csa3G853150.1	CAAT-box	CCAAT	1934	5	+	Arabidopsis thaliana	common cis-acting element in promoter and enhancer regions
Csa3G853150.1	CAAT-box	CAAT	1935	4	+	Nicotiana glutinosa
Csa3G853150.1	CAAT-box	CAAT	1972	4	+	Nicotiana glutinosa
Csa3G853150.1	WRE3	CCACCT	1872	6	+	Pisum sativum
Csa3G853150.1	MYC	CATTTG	889	6	+	Arabidopsis thaliana
Csa3G853150.1	MYC	CATTTG	1154	6	+	Arabidopsis thaliana
Csa3G853150.1	MYC	CATTTG	1650	6	-	Arabidopsis thaliana
Csa3G853150.1	STRE	AGGGG	773	5	+	Arabidopsis thaliana
Csa3G853150.1	STRE	AGGGG	1839	5	-	Arabidopsis thaliana
Csa3G853150.1	WUN-motif	CAATTACAT	584	9	-	Nicotiana glutinosa
Csa3G853160.1	ACE	CTAACGTATT	546	9	+	Petroselinum crispum	cis-acting element involved in light responsiveness
Csa3G853160.1	GA-motif	ATAGATAA	1109	8	+	Arabidopsis thaliana	part of a light responsive element
Csa3G853160.1	TCA-element	CCATCTTTTT	207	9	-	Nicotiana tabacum	cis-acting element involved in salicylic acid responsiveness
Csa3G853160.1	MYC	CAATTG	229	6	+	Arabidopsis thaliana
Csa3G853160.1	MYC	CAATTG	868	6	+	Arabidopsis thaliana
Csa3G853160.1	MYB	CAACAG	87	6	+	Arabidopsis thaliana
Csa3G853160.1	MYB	TAACCA	347	6	+	Arabidopsis thaliana
Csa3G853160.1	MYB	TAACCA	617	6	+	Arabidopsis thaliana
Csa3G853160.1	MYB	CAACCA	801	6	-	Arabidopsis thaliana
Csa3G853160.1	MYB	TAACCA	1275	6	-	Arabidopsis thaliana
Csa3G853160.1	MYB	TAACCA	1650	6	-	Arabidopsis thaliana
Csa3G853160.1	MYB	TAACCA	1711	6	+	Arabidopsis thaliana
Csa3G853160.1	AT~TATA-box	TATATA	366	6	+	Arabidopsis thaliana
Csa3G853160.1	AT~TATA-box	TATATA	1826	6	-	Arabidopsis thaliana
Csa3G853160.1	AT~TATA-box	TATATA	1939	6	-	Arabidopsis thaliana
Csa3G853160.1	AT~TATA-box	TATATA	1941	6	-	Arabidopsis thaliana
Csa3G853160.1	AT~TATA-box	TATATA	1943	6	-	Arabidopsis thaliana
Csa3G853160.1	AT~TATA-box	TATATA	1945	6	-	Arabidopsis thaliana
Csa3G853160.1	Box 4	ATTAAT	667	6	+	Petroselinum crispum	part of a conserved DNA module involved in light responsiveness
Csa3G853160.1	Box 4	ATTAAT	980	6	+	Petroselinum crispum	part of a conserved DNA module involved in light responsiveness
Csa3G853160.1	Box 4	ATTAAT	1909	6	-	Petroselinum crispum	part of a conserved DNA module involved in light responsiveness
Csa3G853160.1	Box 4	ATTAAT	1960	6	-	Petroselinum crispum	part of a conserved DNA module involved in light responsiveness
Csa3G853160.1	CAAT-box	CAAT	2	4	-	Nicotiana glutinosa
Csa3G853160.1	CAAT-box	CAAAT	10	5	+	Pisum sativum	common cis-acting element in promoter and enhancer regions
Csa3G853160.1	CAAT-box	CAAT	15	4	+	Nicotiana glutinosa
Csa3G853160.1	CAAT-box	CAAT	65	4	+	Nicotiana glutinosa
Csa3G853160.1	CAAT-box	CAAT	117	4	+	Nicotiana glutinosa
Csa3G853160.1	CAAT-box	CCAAT	228	5	+	Arabidopsis thaliana	common cis-acting element in promoter and enhancer regions
Csa3G853160.1	CAAT-box	CAAT	229	4	+	Nicotiana glutinosa
Csa3G853160.1	CAAT-box	CAAT	231	4	-	Nicotiana glutinosa
Csa3G853160.1	CAAT-box	CAAT	376	4	-	Nicotiana glutinosa
Csa3G853160.1	CAAT-box	CAAAT	427	5	+	Pisum sativum	common cis-acting element in promoter and enhancer regions
Csa3G853160.1	CAAT-box	CAAT	544	4	+	Nicotiana glutinosa
Csa3G853160.1	CAAT-box	CAAT	579	4	+	Nicotiana glutinosa
Csa3G853160.1	CAAT-box	CAAT	631	4	+	Nicotiana glutinosa
Csa3G853160.1	CAAT-box	CAAAT	679	5	+	Pisum sativum	common cis-acting element in promoter and enhancer regions
Csa3G853160.1	CAAT-box	CCAAT	867	5	+	Arabidopsis thaliana	common cis-acting element in promoter and enhancer regions
Csa3G853160.1	CAAT-box	CAAT	868	4	+	Nicotiana glutinosa
Csa3G853160.1	CAAT-box	CAAT	870	4	-	Nicotiana glutinosa
Csa3G853160.1	CAAT-box	CAAAT	977	5	+	Pisum sativum	common cis-acting element in promoter and enhancer regions
Csa3G853160.1	CAAT-box	CAAAT	1002	5	-	Pisum sativum	common cis-acting element in promoter and enhancer regions
Csa3G853160.1	CAAT-box	CAAAT	1046	5	-	Pisum sativum	common cis-acting element in promoter and enhancer regions
Csa3G853160.1	CAAT-box	CAAT	1071	4	-	Nicotiana glutinosa
Csa3G853160.1	CAAT-box	CAAT	1091	4	-	Nicotiana glutinosa
Csa3G853160.1	CAAT-box	CCAAT	1106	5	+	Arabidopsis thaliana	common cis-acting element in promoter and enhancer regions
Csa3G853160.1	CAAT-box	CAAT	1107	4	+	Nicotiana glutinosa
Csa3G853160.1	CAAT-box	CAAT	1118	4	-	Nicotiana glutinosa
Csa3G853160.1	CAAT-box	CAAT	1208	4	-	Nicotiana glutinosa
Csa3G853160.1	CAAT-box	CAAT	1213	4	+	Nicotiana glutinosa
Csa3G853160.1	CAAT-box	CAAAT	1252	5	+	Pisum sativum	common cis-acting element in promoter and enhancer regions
Csa3G853160.1	CAAT-box	CAAAT	1255	5	-	Pisum sativum	common cis-acting element in promoter and enhancer regions
Csa3G853160.1	CAAT-box	CAAT	1311	4	-	Nicotiana glutinosa
Csa3G853160.1	CAAT-box	CAAT	1505	4	-	Nicotiana glutinosa
Csa3G853160.1	CAAT-box	CAAT	1562	4	-	Nicotiana glutinosa
Csa3G853160.1	CAAT-box	CAAAT	1566	5	+	Pisum sativum	common cis-acting element in promoter and enhancer regions
Csa3G853160.1	CAAT-box	CCAAT	1635	5	+	Arabidopsis thaliana	common cis-acting element in promoter and enhancer regions
Csa3G853160.1	CAAT-box	CAAT	1636	4	+	Nicotiana glutinosa
Csa3G853160.1	CAAT-box	CAAT	1721	4	-	Nicotiana glutinosa
Csa3G853160.1	CAAT-box	CAAT	1776	4	-	Nicotiana glutinosa
Csa3G853160.1	CAAT-box	CAAT	1835	4	-	Nicotiana glutinosa
Csa3G853160.1	CAAT-box	CAAT	1932	4	-	Nicotiana glutinosa
Csa3G853160.1	ERE	ATTTCATA	1279	8	-	Nicotiana glutinos
Csa3G853160.1	GT1-motif	GGTTAA	346	6	-	Arabidopsis thaliana	light responsive element
Csa3G853160.1	GT1-motif	GGTTAA	1651	6	+	Arabidopsis thaliana	light responsive element
Csa3G853160.1	GT1-motif	GGTTAA	1756	6	+	Arabidopsis thaliana	light responsive element
Csa3G853160.1	G-box	TAAACGTG	465	8	+	Brassica oleracea	cis-acting regulatory element involved in light responsiveness
Csa3G853160.1	Myb-binding site	CAACAG	87	6	+	Nicotiana tabacum
Csa3G853160.1	G-Box	CACGTT	175	6	+	Pisum sativum	cis-acting regulatory element involved in light responsiveness
Csa3G853160.1	G-Box	CACGTT	467	6	-	Pisum sativum	cis-acting regulatory element involved in light responsiveness
Csa3G853160.1	MBS	CAACTG	621	6	+	Arabidopsis thaliana	MYB binding site involved in drought-inducibility
Csa3G853160.1	ARE	AAACCA	246	6	+	Zea mays	cis-acting regulatory element essential for the anaerobic induction
Csa3G853160.1	ARE	AAACCA	278	6	+	Zea mays	cis-acting regulatory element essential for the anaerobic induction
Csa3G853160.1	ARE	AAACCA	829	6	-	Zea mays	cis-acting regulatory element essential for the anaerobic induction
Csa3G853160.1	ARE	AAACCA	1716	6	+	Zea mays	cis-acting regulatory element essential for the anaerobic induction
Csa3G853160.1	ARE	AAACCA	1797	6	-	Zea mays	cis-acting regulatory element essential for the anaerobic induction
Csa3G853160.1	TATA	TATAAAAT	203	8	+	Arabidopsis thaliana
Csa3G853160.1	TATA	TATAAAAT	688	8	+	Arabidopsis thaliana
Csa3G853160.1	TATA	TATAAAAT	1079	8	-	Arabidopsis thaliana
Csa3G853160.1	TATA	TATAAAAT	1695	8	-	Arabidopsis thaliana
Csa3G853160.1	TCA	TCATCTTCAT	769	9	+	Pisum sativum
Csa3G853160.1	TCA	TCATCTTCAT	785	9	+	Pisum sativum
Csa3G853160.1	Unnamed__1	CGTGG	174	5	-	Zea mays
Csa3G853160.1	W box	TTGACC	3	6	+	Arabidopsis thaliana
Csa3G853160.1	AAGAA-motif	GAAAGAA	563	7	+	Avena sativa
Csa3G853160.1	AAGAA-motif	gGTAAAGAAA	891	9	-	Avena sativa
Csa3G853160.1	MYB-like sequence	TAACCA	347	6	+	Arabidopsis thaliana
Csa3G853160.1	MYB-like sequence	TAACCA	617	6	+	Arabidopsis thaliana
Csa3G853160.1	MYB-like sequence	TAACCA	1275	6	-	Arabidopsis thaliana
Csa3G853160.1	MYB-like sequence	TAACCA	1650	6	-	Arabidopsis thaliana
Csa3G853160.1	MYB-like sequence	TAACCA	1711	6	+	Arabidopsis thaliana
Csa3G853160.1	LAMP-element	CTTTATCA	1167	8	+	Pisum sativum	part of a light responsive element
Csa3G853160.1	Unnamed__4	CTCC	158	4	-	Petroselinum hortense
Csa3G853160.1	Unnamed__4	CTCC	198	4	+	Petroselinum hortense
Csa3G853160.1	Unnamed__4	CTCC	226	4	+	Petroselinum hortense
Csa3G853160.1	Unnamed__4	CTCC	315	4	+	Petroselinum hortense
Csa3G853160.1	Unnamed__4	CTCC	461	4	-	Petroselinum hortense
Csa3G853160.1	Unnamed__4	CTCC	530	4	+	Petroselinum hortense
Csa3G853160.1	Unnamed__4	CTCC	1104	4	+	Petroselinum hortense
Csa3G853160.1	Unnamed__4	CTCC	1201	4	-	Petroselinum hortense
Csa3G853160.1	Myb	CAACTG	621	6	+	Arabidopsis thaliana
Csa3G853160.1	GARE-motif	TCTGTTG	87	7	-	Brassica oleracea	gibberellin-responsive element
Csa3G853160.1	AT-rich element	ATAGAAATCAA	1019	10	+	Glycine max	binding site of AT-rich DNA binding protein (ATBP-1)
Csa3G853160.1	TATA-box	TATA	113	4	+	Arabidopsis thaliana	core promoter element around -30 of transcription start
Csa3G853160.1	TATA-box	ATATAA	202	6	+	Brassica oleracea	core promoter element around -30 of transcription start
Csa3G853160.1	TATA-box	TATA	203	4	+	Arabidopsis thaliana	core promoter element around -30 of transcription start
Csa3G853160.1	TATA-box	TATA	308	4	+	Arabidopsis thaliana	core promoter element around -30 of transcription start
Csa3G853160.1	TATA-box	TATA	332	4	+	Arabidopsis thaliana	core promoter element around -30 of transcription start
Csa3G853160.1	TATA-box	TATATA	366	6	+	Arabidopsis thaliana	core promoter element around -30 of transcription start
Csa3G853160.1	TATA-box	TATA	368	4	+	Arabidopsis thaliana	core promoter element around -30 of transcription start
Csa3G853160.1	TATA-box	TATA	439	4	+	Arabidopsis thaliana	core promoter element around -30 of transcription start
Csa3G853160.1	TATA-box	ATTATA	509	6	+	Brassica napus	core promoter element around -30 of transcription start
Csa3G853160.1	TATA-box	TATAA	510	5	-	Arabidopsis thaliana	core promoter element around -30 of transcription start
Csa3G853160.1	TATA-box	TATA	511	4	+	Arabidopsis thaliana	core promoter element around -30 of transcription start
Csa3G853160.1	TATA-box	ATTATA	686	6	+	Brassica napus	core promoter element around -30 of transcription start
Csa3G853160.1	TATA-box	TATAA	687	5	-	Arabidopsis thaliana	core promoter element around -30 of transcription start
Csa3G853160.1	TATA-box	TATA	688	4	+	Arabidopsis thaliana	core promoter element around -30 of transcription start
Csa3G853160.1	TATA-box	ATTATA	762	6	+	Brassica napus	core promoter element around -30 of transcription start
Csa3G853160.1	TATA-box	TATAA	763	5	-	Arabidopsis thaliana	core promoter element around -30 of transcription start
Csa3G853160.1	TATA-box	TATA	764	4	+	Arabidopsis thaliana	core promoter element around -30 of transcription start
Csa3G853160.1	TATA-box	TATAAA	960	6	-	Helianthus annuus	core promoter element around -30 of transcription start
Csa3G853160.1	TATA-box	TATAA	961	5	-	Arabidopsis thaliana	core promoter element around -30 of transcription start
Csa3G853160.1	TATA-box	TATA	962	4	+	Arabidopsis thaliana	core promoter element around -30 of transcription start
Csa3G853160.1	TATA-box	TATAA	1075	5	-	Arabidopsis thaliana	core promoter element around -30 of transcription start
Csa3G853160.1	TATA-box	TATA	1076	4	-	Arabidopsis thaliana	core promoter element around -30 of transcription start
Csa3G853160.1	TATA-box	TATAAAA	1080	7	-	Pisum sativum	core promoter element around -30 of transcription start
Csa3G853160.1	TATA-box	TATAAA	1081	6	-	Helianthus annuus	core promoter element around -30 of transcription start
Csa3G853160.1	TATA-box	TATAA	1082	5	-	Arabidopsis thaliana	core promoter element around -30 of transcription start
Csa3G853160.1	TATA-box	TATA	1083	4	-	Arabidopsis thaliana	core promoter element around -30 of transcription start
Csa3G853160.1	TATA-box	TATA	1286	4	-	Arabidopsis thaliana	core promoter element around -30 of transcription start
Csa3G853160.1	TATA-box	ATTATA	1299	6	+	Brassica napus	core promoter element around -30 of transcription start
Csa3G853160.1	TATA-box	TATAA	1300	5	-	Arabidopsis thaliana	core promoter element around -30 of transcription start
Csa3G853160.1	TATA-box	TATA	1301	4	-	Arabidopsis thaliana	core promoter element around -30 of transcription start
Csa3G853160.1	TATA-box	TATAAAA	1446	7	-	Pisum sativum	core promoter element around -30 of transcription start
Csa3G853160.1	TATA-box	TATAAA	1447	6	-	Helianthus annuus	core promoter element around -30 of transcription start
Csa3G853160.1	TATA-box	TATAA	1448	5	-	Arabidopsis thaliana	core promoter element around -30 of transcription start
Csa3G853160.1	TATA-box	TATA	1449	4	-	Arabidopsis thaliana	core promoter element around -30 of transcription start
Csa3G853160.1	TATA-box	ATATAA	1543	6	+	Brassica oleracea	core promoter element around -30 of transcription start
Csa3G853160.1	TATA-box	TATA	1544	4	-	Arabidopsis thaliana	core promoter element around -30 of transcription start
Csa3G853160.1	TATA-box	TATA	1570	4	-	Arabidopsis thaliana	core promoter element around -30 of transcription start
Csa3G853160.1	TATA-box	TATA	1664	4	-	Arabidopsis thaliana	core promoter element around -30 of transcription start
Csa3G853160.1	TATA-box	TATAAA	1672	6	-	Helianthus annuus	core promoter element around -30 of transcription start
Csa3G853160.1	TATA-box	TATAA	1673	5	-	Arabidopsis thaliana	core promoter element around -30 of transcription start
Csa3G853160.1	TATA-box	TATA	1674	4	-	Arabidopsis thaliana	core promoter element around -30 of transcription start
Csa3G853160.1	TATA-box	TATAAAA	1696	7	-	Pisum sativum	core promoter element around -30 of transcription start
Csa3G853160.1	TATA-box	TATAAA	1697	6	-	Helianthus annuus	core promoter element around -30 of transcription start
Csa3G853160.1	TATA-box	TATAA	1698	5	-	Arabidopsis thaliana	core promoter element around -30 of transcription start
Csa3G853160.1	TATA-box	TATA	1699	4	-	Arabidopsis thaliana	core promoter element around -30 of transcription start
Csa3G853160.1	TATA-box	TATAAAA	1770	7	-	Pisum sativum	core promoter element around -30 of transcription start
Csa3G853160.1	TATA-box	TATAAA	1771	6	-	Helianthus annuus	core promoter element around -30 of transcription start
Csa3G853160.1	TATA-box	TATAA	1772	5	-	Arabidopsis thaliana	core promoter element around -30 of transcription start
Csa3G853160.1	TATA-box	TATA	1773	4	-	Arabidopsis thaliana	core promoter element around -30 of transcription start
Csa3G853160.1	TATA-box	ATTATA	1824	6	+	Brassica napus	core promoter element around -30 of transcription start
Csa3G853160.1	TATA-box	TATATAA	1825	7	-	Arabidopsis thaliana	core promoter element around -30 of transcription start
Csa3G853160.1	TATA-box	TATATA	1826	6	-	Arabidopsis thaliana	core promoter element around -30 of transcription start
Csa3G853160.1	TATA-box	ATATAA	1827	6	+	Brassica oleracea	core promoter element around -30 of transcription start
Csa3G853160.1	TATA-box	TATA	1828	4	-	Arabidopsis thaliana	core promoter element around -30 of transcription start
Csa3G853160.1	TATA-box	TAAAGATT	1830	8	+	Arabidopsis thaliana	core promoter element around -30 of transcription start
Csa3G853160.1	TATA-box	TATTTAAA	1839	8	+	Arabidopsis thaliana	core promoter element around -30 of transcription start
Csa3G853160.1	TATA-box	ATATAA	1926	6	+	Brassica oleracea	core promoter element around -30 of transcription start
Csa3G853160.1	TATA-box	TATA	1927	4	-	Arabidopsis thaliana	core promoter element around -30 of transcription start
Csa3G853160.1	TATA-box	taTATAAAtc	1937	9	-	Arabidopsis thaliana	core promoter element around -30 of transcription start
Csa3G853160.1	TATA-box	ATATAT	1938	6	-	Brassica napus	core promoter element around -30 of transcription start
Csa3G853160.1	TATA-box	TATATA	1939	6	-	Arabidopsis thaliana	core promoter element around -30 of transcription start
Csa3G853160.1	TATA-box	ATATAT	1940	6	-	Brassica napus	core promoter element around -30 of transcription start
Csa3G853160.1	TATA-box	TATATA	1941	6	-	Arabidopsis thaliana	core promoter element around -30 of transcription start
Csa3G853160.1	TATA-box	ATATAT	1942	6	-	Brassica napus	core promoter element around -30 of transcription start
Csa3G853160.1	TATA-box	TATATA	1943	6	-	Arabidopsis thaliana	core promoter element around -30 of transcription start
Csa3G853160.1	TATA-box	ATATAT	1944	6	-	Brassica napus	core promoter element around -30 of transcription start
Csa3G853160.1	TATA-box	TATATA	1945	6	-	Arabidopsis thaliana	core promoter element around -30 of transcription start
Csa3G853160.1	TATA-box	ATATAT	1946	6	-	Brassica napus	core promoter element around -30 of transcription start
Csa3G853160.1	TATA-box	TATA	1947	4	-	Arabidopsis thaliana	core promoter element around -30 of transcription start
Csa3G853160.1	ABRE	ACGTG	175	5	-	Arabidopsis thaliana	cis-acting element involved in the abscisic acid responsiveness
Csa3G853160.1	ABRE	ACGTG	468	5	+	Arabidopsis thaliana	cis-acting element involved in the abscisic acid responsiveness
Csa3G853160.1	ABRE	TACGGTC	1385	7	-	Arabidopsis thaliana	cis-acting element involved in the abscisic acid responsiveness
Csa3G853160.1	Box III	atCATTTTCACt	790	11	+	Pisum sativum	protein binding site
Csa3G853160.1	LTR	CCGAAA	1030	6	+	Hordeum vulgare	cis-acting element involved in low-temperature responsiveness
Csa3G853160.1	LTR	CCGAAA	1894	6	+	Hordeum vulgare	cis-acting element involved in low-temperature responsiveness
Csa3G853160.1	TCT-motif	TCTTAC	952	6	+	Arabidopsis thaliana	part of a light responsive element
Csa3G853160.1	Unnamed__6	taTAAATATct	1936	10	-	Zea mays
Csa3G853170.1	G-Box	TCCACATGGCA	1491	10	+	Triticum aestivum	cis-acting regulatory element involved in light responsiveness
Csa3G853170.1	MBS	CAACTG	235	6	+	Arabidopsis thaliana	MYB binding site involved in drought-inducibility
Csa3G853170.1	AAAC-motif	CAATCAAAACCT	1039	11	+	Spinacia oleracea	light responsive element
Csa3G853170.1	HD-Zip 1	CAAT(A/T)ATTG	1677	8	-	Arabidopsis thaliana	element involved in differentiation of the palisade mesophyll cells
Csa3G853170.1	ARE	AAACCA	539	6	+	Zea mays	cis-acting regulatory element essential for the anaerobic induction
Csa3G853170.1	TATA	TATAAAAT	604	8	-	Arabidopsis thaliana
Csa3G853170.1	TATA	TATAAAAT	789	8	-	Arabidopsis thaliana
Csa3G853170.1	TATA	TATAAAAT	1886	8	-	Arabidopsis thaliana
Csa3G853170.1	ABRE3a	TACGTG	1389	6	+	Zea mays
Csa3G853170.1	ATC-motif	AGTAATCT	1805	8	+	Spinacia oleracea	part of a conserved DNA module involved in light responsiveness
Csa3G853170.1	G-box	TACGTG	1389	6	+	Arabidopsis thaliana	cis-acting regulatory element involved in light responsiveness
Csa3G853170.1	MRE	AACCTAA	1046	7	+	Petroselinum crispum	MYB binding site involved in light responsiveness
Csa3G853170.1	MRE	AACCTAA	1346	7	+	Petroselinum crispum	MYB binding site involved in light responsiveness
Csa3G853170.1	Myb-binding site	CAACAG	847	6	-	Nicotiana tabacum
Csa3G853170.1	Myb-binding site	CAACAG	1471	6	-	Nicotiana tabacum
Csa3G853170.1	ABRE4	CACGTA	1389	6	-	Zea mays
Csa3G853170.1	Box 4	ATTAAT	322	6	+	Petroselinum crispum	part of a conserved DNA module involved in light responsiveness
Csa3G853170.1	Box 4	ATTAAT	464	6	+	Petroselinum crispum	part of a conserved DNA module involved in light responsiveness
Csa3G853170.1	Box 4	ATTAAT	1037	6	-	Petroselinum crispum	part of a conserved DNA module involved in light responsiveness
Csa3G853170.1	Box 4	ATTAAT	1650	6	-	Petroselinum crispum	part of a conserved DNA module involved in light responsiveness
Csa3G853170.1	AT~TATA-box	TATATA	703	6	+	Arabidopsis thaliana
Csa3G853170.1	AT~TATA-box	TATATA	1619	6	-	Arabidopsis thaliana
Csa3G853170.1	AT~TATA-box	TATATA	1621	6	-	Arabidopsis thaliana
Csa3G853170.1	AT~TATA-box	TATATAAA	1908	8	-	Arabidopsis thaliana
Csa3G853170.1	AT~TATA-box	TATATA	1910	6	-	Arabidopsis thaliana
Csa3G853170.1	AT~TATA-box	TATATA	1912	6	-	Arabidopsis thaliana
Csa3G853170.1	AT~TATA-box	TATATA	1914	6	-	Arabidopsis thaliana
Csa3G853170.1	AT~TATA-box	TATATA	1916	6	-	Arabidopsis thaliana
Csa3G853170.1	MYB	CAACAG	847	6	-	Arabidopsis thaliana
Csa3G853170.1	MYB	CAACAG	1471	6	-	Arabidopsis thaliana
Csa3G853170.1	MYB	CAACCA	1589	6	+	Arabidopsis thaliana
Csa3G853170.1	MYB	TAACCA	1766	6	+	Arabidopsis thaliana
Csa3G853170.1	CAAT-box	CAAT	4	4	-	Nicotiana glutinosa
Csa3G853170.1	CAAT-box	CAAT	42	4	-	Nicotiana glutinosa
Csa3G853170.1	CAAT-box	CAAT	71	4	-	Nicotiana glutinosa
Csa3G853170.1	CAAT-box	CAAAT	246	5	-	Pisum sativum	common cis-acting element in promoter and enhancer regions
Csa3G853170.1	CAAT-box	CAAAT	317	5	-	Pisum sativum	common cis-acting element in promoter and enhancer regions
Csa3G853170.1	CAAT-box	CCCAATTT	335	8	-	Arabidopsis thaliana	common cis-acting element in promoter and enhancer regions
Csa3G853170.1	CAAT-box	CCAAT	337	5	-	Arabidopsis thaliana	common cis-acting element in promoter and enhancer regions
Csa3G853170.1	CAAT-box	CAAAT	503	5	+	Pisum sativum	common cis-acting element in promoter and enhancer regions
Csa3G853170.1	CAAT-box	CAAT	530	4	-	Nicotiana glutinosa
Csa3G853170.1	CAAT-box	CAAT	551	4	+	Nicotiana glutinosa
Csa3G853170.1	CAAT-box	CAAT	696	4	-	Nicotiana glutinosa
Csa3G853170.1	CAAT-box	CAAT	779	4	+	Nicotiana glutinosa
Csa3G853170.1	CAAT-box	CAAT	801	4	-	Nicotiana glutinosa
Csa3G853170.1	CAAT-box	CCAAT	863	5	-	Arabidopsis thaliana	common cis-acting element in promoter and enhancer regions
Csa3G853170.1	CAAT-box	CAAAT	949	5	-	Pisum sativum	common cis-acting element in promoter and enhancer regions
Csa3G853170.1	CAAT-box	CAAAT	956	5	-	Pisum sativum	common cis-acting element in promoter and enhancer regions
Csa3G853170.1	CAAT-box	CAAT	1024	4	+	Nicotiana glutinosa
Csa3G853170.1	CAAT-box	CCAAT	1097	5	+	Arabidopsis thaliana	common cis-acting element in promoter and enhancer regions
Csa3G853170.1	CAAT-box	CAAT	1098	4	+	Nicotiana glutinosa
Csa3G853170.1	CAAT-box	CAAT	1116	4	+	Nicotiana glutinosa
Csa3G853170.1	CAAT-box	CAAT	1315	4	-	Nicotiana glutinosa
Csa3G853170.1	CAAT-box	CAAT	1426	4	+	Nicotiana glutinosa
Csa3G853170.1	CAAT-box	CAAAT	1493	5	+	Pisum sativum	common cis-acting element in promoter and enhancer regions
Csa3G853170.1	CAAT-box	CAAAT	1551	5	+	Pisum sativum	common cis-acting element in promoter and enhancer regions
Csa3G853170.1	CAAT-box	CAAT	1585	4	+	Nicotiana glutinosa
Csa3G853170.1	CAAT-box	CAAAT	1596	5	+	Pisum sativum	common cis-acting element in promoter and enhancer regions
Csa3G853170.1	CAAT-box	CAAT	1601	4	-	Nicotiana glutinosa
Csa3G853170.1	CAAT-box	CAAT	1626	4	-	Nicotiana glutinosa
Csa3G853170.1	CAAT-box	CAAAT	1631	5	+	Pisum sativum	common cis-acting element in promoter and enhancer regions
Csa3G853170.1	CAAT-box	CAAAT	1642	5	+	Pisum sativum	common cis-acting element in promoter and enhancer regions
Csa3G853170.1	CAAT-box	CAAT	1654	4	-	Nicotiana glutinosa
Csa3G853170.1	CAAT-box	CAAT	1677	4	+	Nicotiana glutinosa
Csa3G853170.1	CAAT-box	CAAT	1682	4	-	Nicotiana glutinosa
Csa3G853170.1	CAAT-box	CAAT	1697	4	+	Nicotiana glutinosa
Csa3G853170.1	CAAT-box	CAAT	1734	4	+	Nicotiana glutinosa
Csa3G853170.1	CAAT-box	CAAAT	1762	5	+	Pisum sativum	common cis-acting element in promoter and enhancer regions
Csa3G853170.1	CAAT-box	CCAAT	1769	5	+	Arabidopsis thaliana	common cis-acting element in promoter and enhancer regions
Csa3G853170.1	CAAT-box	CAAT	1770	4	+	Nicotiana glutinosa
Csa3G853170.1	CAAT-box	CAAT	1796	4	+	Nicotiana glutinosa
Csa3G853170.1	CAAT-box	CAAT	1824	4	+	Nicotiana glutinosa
Csa3G853170.1	CAAT-box	CAAAT	1826	5	-	Pisum sativum	common cis-acting element in promoter and enhancer regions
Csa3G853170.1	CAAT-box	CCAAT	1928	5	-	Arabidopsis thaliana	common cis-acting element in promoter and enhancer regions
Csa3G853170.1	CAAT-box	CAAAT	1947	5	+	Pisum sativum	common cis-acting element in promoter and enhancer regions
Csa3G853170.1	GT1-motif	GGTTAA	1687	6	+	Arabidopsis thaliana	light responsive element
Csa3G853170.1	GT1-motif	GGTTAA	1689	6	-	Arabidopsis thaliana	light responsive element
Csa3G853170.1	STRE	AGGGG	944	5	+	Arabidopsis thaliana
Csa3G853170.1	WUN-motif	AAATTTCTT	1702	9	-	Nicotiana glutinosa
Csa3G853170.1	P-box	CCTTTTG	1609	7	+	Oryza sativa	gibberellin-responsive element
Csa3G853170.1	TCA-element	CCATCTTTTT	1289	9	-	Nicotiana tabacum	cis-acting element involved in salicylic acid responsiveness
Csa3G853170.1	MYC	CATTTG	245	6	+	Arabidopsis thaliana
Csa3G853170.1	MYC	CATTTG	955	6	+	Arabidopsis thaliana
Csa3G853170.1	MYC	CATTTG	1493	6	-	Arabidopsis thaliana
Csa3G853170.1	ABRE	GCAACGTGTC	13	9	-	Hordeum vulgare	cis-acting element involved in the abscisic acid responsiveness
Csa3G853170.1	ABRE	ACGTG	1390	5	+	Arabidopsis thaliana	cis-acting element involved in the abscisic acid responsiveness
Csa3G853170.1	LTR	CCGAAA	873	6	-	Hordeum vulgare	cis-acting element involved in low-temperature responsiveness
Csa3G853170.1	circadian	CAAAGATATC	136	9	+	Lycopersicon esculentum	cis-acting regulatory element involved in circadian control
Csa3G853170.1	circadian	CAAAGATATC	629	9	-	Lycopersicon esculentum	cis-acting regulatory element involved in circadian control
Csa3G853170.1	TCT-motif	TCTTAC	1784	6	+	Arabidopsis thaliana	part of a light responsive element
Csa3G853170.1	Unnamed__6	taTAAATATct	748	10	+	Zea mays
Csa3G853170.1	Unnamed__6	taTAAATATct	1914	10	+	Zea mays
Csa3G853170.1	Unnamed__4	CTCC	341	4	-	Petroselinum hortense
Csa3G853170.1	Unnamed__4	CTCC	369	4	-	Petroselinum hortense
Csa3G853170.1	Unnamed__4	CTCC	372	4	-	Petroselinum hortense
Csa3G853170.1	Unnamed__4	CTCC	425	4	+	Petroselinum hortense
Csa3G853170.1	Unnamed__4	CTCC	518	4	-	Petroselinum hortense
Csa3G853170.1	Unnamed__4	CTCC	821	4	-	Petroselinum hortense
Csa3G853170.1	Unnamed__4	CTCC	985	4	+	Petroselinum hortense
Csa3G853170.1	Unnamed__4	CTCC	1332	4	+	Petroselinum hortense
Csa3G853170.1	Unnamed__4	CTCC	1341	4	+	Petroselinum hortense
Csa3G853170.1	Unnamed__4	CTCC	1716	4	+	Petroselinum hortense
Csa3G853170.1	Unnamed__4	CTCC	1931	4	-	Petroselinum hortense
Csa3G853170.1	Unnamed__4	CTCC	1975	4	-	Petroselinum hortense
Csa3G853170.1	Myb	CAACTG	235	6	+	Arabidopsis thaliana
Csa3G853170.1	GARE-motif	TCTGTTG	1470	7	+	Brassica oleracea	gibberellin-responsive element
Csa3G853170.1	TATA-box	TATAAA	24	6	-	Helianthus annuus	core promoter element around -30 of transcription start
Csa3G853170.1	TATA-box	TATAA	25	5	-	Arabidopsis thaliana	core promoter element around -30 of transcription start
Csa3G853170.1	TATA-box	TATA	26	4	+	Arabidopsis thaliana	core promoter element around -30 of transcription start
Csa3G853170.1	TATA-box	TACAAAA	198	7	+	Oryza sativa	core promoter element around -30 of transcription start
Csa3G853170.1	TATA-box	ATTATA	446	6	+	Brassica napus	core promoter element around -30 of transcription start
Csa3G853170.1	TATA-box	TATAA	447	5	-	Arabidopsis thaliana	core promoter element around -30 of transcription start
Csa3G853170.1	TATA-box	TATA	448	4	+	Arabidopsis thaliana	core promoter element around -30 of transcription start
Csa3G853170.1	TATA-box	TATAAAA	605	7	-	Pisum sativum	core promoter element around -30 of transcription start
Csa3G853170.1	TATA-box	TATAAA	606	6	-	Helianthus annuus	core promoter element around -30 of transcription start
Csa3G853170.1	TATA-box	TATAA	607	5	-	Arabidopsis thaliana	core promoter element around -30 of transcription start
Csa3G853170.1	TATA-box	TATA	608	4	+	Arabidopsis thaliana	core promoter element around -30 of transcription start
Csa3G853170.1	TATA-box	TACAAAA	634	7	-	Oryza sativa	core promoter element around -30 of transcription start
Csa3G853170.1	TATA-box	ATATAT	702	6	+	Brassica napus	core promoter element around -30 of transcription start
Csa3G853170.1	TATA-box	TATATA	703	6	+	Arabidopsis thaliana	core promoter element around -30 of transcription start
Csa3G853170.1	TATA-box	ATATAA	704	6	+	Brassica oleracea	core promoter element around -30 of transcription start
Csa3G853170.1	TATA-box	TATA	705	4	+	Arabidopsis thaliana	core promoter element around -30 of transcription start
Csa3G853170.1	TATA-box	TATAAAA	745	7	-	Pisum sativum	core promoter element around -30 of transcription start
Csa3G853170.1	TATA-box	TATAAA	746	6	-	Helianthus annuus	core promoter element around -30 of transcription start
Csa3G853170.1	TATA-box	TATAA	747	5	-	Arabidopsis thaliana	core promoter element around -30 of transcription start
Csa3G853170.1	TATA-box	TATA	748	4	+	Arabidopsis thaliana	core promoter element around -30 of transcription start
Csa3G853170.1	TATA-box	ATATAT	753	6	+	Brassica napus	core promoter element around -30 of transcription start
Csa3G853170.1	TATA-box	TATA	754	4	+	Arabidopsis thaliana	core promoter element around -30 of transcription start
Csa3G853170.1	TATA-box	TATAAAA	790	7	-	Pisum sativum	core promoter element around -30 of transcription start
Csa3G853170.1	TATA-box	TATAAA	791	6	-	Helianthus annuus	core promoter element around -30 of transcription start
Csa3G853170.1	TATA-box	TATAA	792	5	-	Arabidopsis thaliana	core promoter element around -30 of transcription start
Csa3G853170.1	TATA-box	TATA	793	4	+	Arabidopsis thaliana	core promoter element around -30 of transcription start
Csa3G853170.1	TATA-box	TACATAAA	967	8	+	Oryza sativa	core promoter element around -30 of transcription start
Csa3G853170.1	TATA-box	ATATAA	1100	6	+	Brassica oleracea	core promoter element around -30 of transcription start
Csa3G853170.1	TATA-box	TATA	1101	4	-	Arabidopsis thaliana	core promoter element around -30 of transcription start
Csa3G853170.1	TATA-box	TACATAAA	1123	8	+	Oryza sativa	core promoter element around -30 of transcription start
Csa3G853170.1	TATA-box	TATA	1139	4	-	Arabidopsis thaliana	core promoter element around -30 of transcription start
Csa3G853170.1	TATA-box	ATATAT	1169	6	-	Brassica napus	core promoter element around -30 of transcription start
Csa3G853170.1	TATA-box	TATA	1170	4	-	Arabidopsis thaliana	core promoter element around -30 of transcription start
Csa3G853170.1	TATA-box	ATATAA	1191	6	+	Brassica oleracea	core promoter element around -30 of transcription start
Csa3G853170.1	TATA-box	TATA	1192	4	-	Arabidopsis thaliana	core promoter element around -30 of transcription start
Csa3G853170.1	TATA-box	TATAAATA	1364	8	-	Daucus carota	core promoter element around -30 of transcription start
Csa3G853170.1	TATA-box	TATAAAT	1365	7	-	Brassica juncea	core promoter element around -30 of transcription start
Csa3G853170.1	TATA-box	TATAAA	1366	6	-	Helianthus annuus	core promoter element around -30 of transcription start
Csa3G853170.1	TATA-box	TATAA	1367	5	-	Arabidopsis thaliana	core promoter element around -30 of transcription start
Csa3G853170.1	TATA-box	TATA	1368	4	-	Arabidopsis thaliana	core promoter element around -30 of transcription start
Csa3G853170.1	TATA-box	TATATA	1619	6	-	Arabidopsis thaliana	core promoter element around -30 of transcription start
Csa3G853170.1	TATA-box	ATATAT	1620	6	-	Brassica napus	core promoter element around -30 of transcription start
Csa3G853170.1	TATA-box	TATATA	1621	6	-	Arabidopsis thaliana	core promoter element around -30 of transcription start
Csa3G853170.1	TATA-box	ATATAT	1622	6	-	Brassica napus	core promoter element around -30 of transcription start
Csa3G853170.1	TATA-box	TATA	1623	4	-	Arabidopsis thaliana	core promoter element around -30 of transcription start
Csa3G853170.1	TATA-box	ATATAA	1645	6	+	Brassica oleracea	core promoter element around -30 of transcription start
Csa3G853170.1	TATA-box	TATA	1646	4	-	Arabidopsis thaliana	core promoter element around -30 of transcription start
Csa3G853170.1	TATA-box	ATTATA	1798	6	+	Brassica napus	core promoter element around -30 of transcription start
Csa3G853170.1	TATA-box	TATAA	1799	5	-	Arabidopsis thaliana	core promoter element around -30 of transcription start
Csa3G853170.1	TATA-box	TATA	1800	4	-	Arabidopsis thaliana	core promoter element around -30 of transcription start
Csa3G853170.1	TATA-box	TAAAGATT	1808	8	-	Arabidopsis thaliana	core promoter element around -30 of transcription start
Csa3G853170.1	TATA-box	TATAAAA	1887	7	-	Pisum sativum	core promoter element around -30 of transcription start
Csa3G853170.1	TATA-box	TATAAA	1888	6	-	Helianthus annuus	core promoter element around -30 of transcription start
Csa3G853170.1	TATA-box	TATAA	1889	5	-	Arabidopsis thaliana	core promoter element around -30 of transcription start
Csa3G853170.1	TATA-box	TATA	1890	4	-	Arabidopsis thaliana	core promoter element around -30 of transcription start
Csa3G853170.1	TATA-box	TATAAAA	1907	7	-	Pisum sativum	core promoter element around -30 of transcription start
Csa3G853170.1	TATA-box	TATAAA	1908	6	-	Helianthus annuus	core promoter element around -30 of transcription start
Csa3G853170.1	TATA-box	TATATAA	1909	7	-	Arabidopsis thaliana	core promoter element around -30 of transcription start
Csa3G853170.1	TATA-box	TATATA	1910	6	-	Arabidopsis thaliana	core promoter element around -30 of transcription start
Csa3G853170.1	TATA-box	ATATAT	1911	6	-	Brassica napus	core promoter element around -30 of transcription start
Csa3G853170.1	TATA-box	TATATA	1912	6	-	Arabidopsis thaliana	core promoter element around -30 of transcription start
Csa3G853170.1	TATA-box	ATATAT	1913	6	-	Brassica napus	core promoter element around -30 of transcription start
Csa3G853170.1	TATA-box	TATATA	1914	6	-	Arabidopsis thaliana	core promoter element around -30 of transcription start
Csa3G853170.1	TATA-box	ATATAT	1915	6	-	Brassica napus	core promoter element around -30 of transcription start
Csa3G853170.1	TATA-box	TATATA	1916	6	-	Arabidopsis thaliana	core promoter element around -30 of transcription start
Csa3G853170.1	TATA-box	ATATAT	1917	6	-	Brassica napus	core promoter element around -30 of transcription start
Csa3G853170.1	TATA-box	TATA	1918	4	-	Arabidopsis thaliana	core promoter element around -30 of transcription start
Csa3G853170.1	MYB-like sequence	TAACCA	1766	6	+	Arabidopsis thaliana
Csa3G853170.1	AAGAA-motif	GAAAGAA	1255	7	+	Avena sativa
Csa3G853170.1	AAGAA-motif	GAAAGAA	1756	7	-	Avena sativa
Csa3G853170.1	GATA-motif	GATAGGA	979	7	-	Arabidopsis thaliana	part of a light responsive element
Csa3G853170.1	Unnamed__1	GAATTTAATTAA	315	11	+	Glycine max	60K protein binding site
Csa3G853170.1	Unnamed__1	CGTGG	427	5	-	Zea mays
