# Supplementary material for: Genome-wide identification of the CYP82 gene family in cucumber and functional characterization of CsCYP82D102 in regulating resistance to powdery mildew
Source: PeerJ. 2024 Mar 28;12:e17162. doi: 10.7717/peerj.17162 (PMC10981884; doi:10.7717/peerj.17162)
Supplement: Supplemental Information 16 [file peerj-12-17162-s016.xlsx]

## Sheet: Hormone treatment
ABA
0h	6h	12h	24h	48h
1	0.0208051	0.08466	0.08655	0.0678686
1	0.140851	0.0636578	0.0344566	0.05757
1	0.220697	0.06335	0.024564	0.0467464
GA3
0h	6h	12h	24h	48h
1	0.014097	0.032788	0.0354376	0.04655
1	0.019866	0.045786	0.0254658	0.036556
1	0.024776	0.065788	0.0566788	0.056678
Salt
0h	6h	12h	24h	48h
1	0.0291521	0.0297998	0.00675009	0.0424075
1	0.0391521	0.0197977	0.016575	0.0524075
1	0.0481521	0.0167998	0.00875009	0.0494075
PEG6000
0h	6h	12h	24h	48h
1	0.442919	1.51621	0.786858	0.8578
1	0.342919	1.41621	0.867578	0.847657
1	0.382919	1.56621	0.857858	0.797686
SA
0h	6h	12h	24h	48h
1	1.56711	2.13945	14.5428	1601.07
1	1.75671	2.10876	14.7428	1599.95
1	1.76711	2.14941	14.4281	1601.69
MeJA
0h	6h	12h	24h	48h
1	1.3716	1.86172	218.449	0.478423
1	1.24456	1.76348	219.067	0.568832
1	1.4803	1.84327	218.342	0.468324
ETH
0h	6h	12h	24h	48h
1	0.349421	0.234482	0.198834	0.0143
1	0.305127	0.274723	0.204342	0.04342
1	0.372349	0.389294	0.178432	0.0164923

## Sheet: Downstream gene detection
APX
	WT		OE#1		OE#3
0d	1	1	1.1988	1.2897	1.34556	1.35989
7d	1.2655	1.22658	2.3566	2.54588	2.45886	2.41889
15d	1.2655	1.2236	2.84999	2.97813	3.45213	3.51545
PR2
	WT		OE#1		OE#3
0d	1	1	0.899856	0.814666	0.79565	0.78945
7d	0.98989	0.9788	0.732265	0.728446	0.6898	0.5898
15d	1.00557	1.00455	0.69466	0.594645	0.545123	0.453516
PR4
	WT		OE#1		OE#3
0d	1	1	0.76552	0.71235	0.65126	0.55126
7d	1.14646	1.14566	0.614522	0.691156	0.423565	0.323565
15d	1.11562	1.11534	0.302284	0.402284	0.202888	0.102338
PR1
	WT		OE#1		OE#3
0d	1	1.20022	1.94585	1.84585	1.15848	1.05848
7d	1.59895	1.69896	2.78585	2.68485	2.85848	2.75848
15d	1.75887	1.6589	2.12566	2.13569	2.98488	2.84888
PR5
	WT		OE#1		OE#3
0d	1	1	36.2319	36.3319	34.2659	34.365
7d	3.56511	3.56956	39.2157	39.1156	35.4567	35.8665
15d	5.45623	5.35987	39.9198	40.0112	37.4564	37.8657
LOX2
	WT		OE#1		OE#3
0d	1	1.01259	8.19898	8.29866	9.6585	9.78656
7d	1.21588	1.15234	9.1833	9.2833	10.1557	10.2557
15d	1.32155	1.22156	10.8989	10.9864	10.3586	10.4586
JAR1
	WT		OE#1		OE#3
0d	1	1.00021	58.8303	58.123	48.8302	48.7302
7d	12.2327	12.4589	59.9457	60.9457	49.7302	48.6585
15d	10.2568	10.4586	62.1255	62.2253	50.2315	51.3347
CAT2
	WT		OE#1		OE#3
0d	1	1	4.1988	4.2897	5.34556	5.35989
7d	1.2655	1.22658	5.3566	5.54588	6.45886	6.41889
15d	1.2655	1.2236	6.84999	6.97813	7.45213	7.51545

## Sheet: Expression of transgenic plants
Expression in different tissue parts
CK	Roots	Stems	Leaves	Flowers	Seeds
1	21.7898	8.34655	10.5588	3.46768	1.58768
1	21.5668	8.34647	10.6768	3.67685	1.57869
1	21.4566	8.38969	10.3343	3.21536	1.57869
Expression quantity of RNAi cucumber
CK	RNAi#1	RNAi#2	RNAi#3	RNAi#4	RNAi#5
1	0.798946	0.563849	0.643646	0.654636	0.523113
1	0.677995	0.453234	0.623222	0.663728	0.459934
1	0.7434	0.534353	0.594345	0.62295	0.454543

## Sheet: Physiological index detection
POD
	WT		OE#1		OE#3			WT		RNAi#2		RNAi#5
0d	37333	36333	31400	32400	37258	36258		37333	36333	35623	35222	37258	36258
7d	95800	94833	41067	42067	56867	54728		95800	94833	82678	83243	89345	87443
15d	71733	72733	36667	37667	45866	44866		71733	72733	62122	63122	55637	54876
SOD
	WT		OE#1		OE#3			WT		RNAi#2		RNAi#5
0d	30.8	31.9	40.6	41.8	44.1	43.2		30.8	31.9	27.9	26.3	34.2	33.8
7d	15.8	14.6	30.3	31.2	29.2	28.3		15.8	14.6	24.7	23.8	29.2	28.3
15d	10.6	11.8	25.3	28	16.1	15.4		10.6	11.8	18.9	19.3	16.1	15.4
CAT
	WT		OE#1		OE#3			WT		RNAi#2		RNAi#5
0d	235	240	420	410	438	439.5		235	240	275	268.6	387.5	390.1
7d	350	355	312.5	318	342.5	345		350	355	372	373.8	312.3	315.4
15d	212.5	217	322.5	328.6	385.4	386		212.5	217	322.5	328.6	287.6	289
MDA
	WT		OE#1		OE#3			WT		RNAi#2		RNAi#5
0d	5.8	5.1	5.8	5.5	6.8	7		31.8	31.1	35	34.8	31.7	30.8
7d	9.2	9.9	9.4	9.8	11.5	12.7		16.8	16	27.8	28.3	17.3	18.2
15d	10.3	10.9	15.3	15.8	15.3	15.8		11.6	11.4	16.3	17.2	11.6	11.4

## Sheet: Lesion area
	7d		15d
WT	29.7	30.5	65.8	66.7
OEi#1	18.3	17.5	28.3	29.6
OE#3	7.9	8.7	27.6	26.8
	7d		15d
WT	29.7	30.5	65.8	66.7
RNAi#2	32.4	31.8	89.4	88.3
RNAi#5	32.9	33.8	89.6	90.2

## Sheet: Sheet1
Csa3G852610
female flower	male flower	leaf	root	stem	tendril
0.46611	0.172752	0.916515	1.09736	0.842906	2.30773
0.454568	0.16898	0.937495	1.53487	0.67687	2.08945
0.452233	0.173443	0.89384	1.3443	0.883924	2.19733
Csa3G852560
female flower	male flower	leaf	root	stem	tendril
1.51809	0.772539	1.28515	0.314413	1.41077	6.85918
1.34344	0.67896	1.23443	0.378979	1.34323	7.9091
1.34324	0.334294	1.32349	0.44543	1.34932	6.33242
Csa3G852580
female flower	male flower	leaf	root	stem	tendril
1.1977	0.754033	1.30299	0.502313	1.00413	0.419657
1.1879	0.45466	1.23409	0.459549	0.90909	0.233342
1.29438	0.673244	1.23942	0.342873	0.823943	0.334248
Csa3G852590
female flower	male flower	leaf	root	stem	tendril
3.56328	1.78933	6.08923	0.3434	3.02778	8.77778
3.45656	1.54645	6.43453	0.435345	3.4536	8.54266
3.45924	1.6833	6.23424	0.132123	3.08412	7.99023
Csa3G852600
female flower	male flower	leaf	root	stem	tendril
3.10526	1.15159	1.36321	6.06552	4.05455	8.64638
3.24234	1.34342	1.56756	5.32452	4.32423	8.979
3.8234	1.23443	1.34545	6.02432	4.24324	8.62423
Csa3G853140
female flower	male flower	leaf	root	stem	tendril
0.0408659	0.121788	0.403803	0.784341	0	0.0169937
0.234244	0.134342	0.352534	0.856766	0.123132	0.143645
0.34324	0.324324	0.324325	0.674238	0.34328	0.03434
Csa3G852610PM
0h	6h	12h	24h
1	1.29523	2.89283	3.67285
1	1.28375	2.9898	3.23432
1	1.49758	2.9898	3.56455
Csa3G852630PM
0h	6h	12h	24h
1	0.851717	1.1583	3.28901
1	0.756783	1.40716	3.21583
1	0.8555	1.23343	4.10295
Csa3G853160PM
0h	6h	12h	24h
1	1.78109	5.34858	6.86328
1	1.86869	5.78294	6.87298
1	1.9787	5.98293	6.9898
Csa3G852640PM
0h	6h	12h	24h
1	0.918541	0.947846	1.005
1	0.979474	0.887834	0.983984
1	0.78347	0.872395	0.938925
